# Supplementary material for: Merging Allosteric and Active Site Binding Motifs: De novo Generation of Target Selectivity and Potency via Natural-Product-Derived Fragments
Source: PubMed Central journal article supplement (PMC4506557; doi:10.1002/cmdc.201402478), 2014-12-08
Supplement: cmdc0010-0451-sd1.pdf [file cmdc0010-0451-sd1.pdf]

## Supporting Information

© Copyright Wiley-VCH Verlag GmbH & Co. KGaA, 69451 Weinheim, 2015

### **Merging Allosteric and Active Site Binding Motifs: De novo Generation of Target Selectivity and Potency via Natural-Product-Derived Fragments**

Jan Lanz and Rainer Riedl<sup>\*[a]</sup>

cmdc\_201402478\_sm\_miscellaneous\_information.pdf

# **Supporting Information**

## **Table of Contents**

|                                                          |     |
|----------------------------------------------------------|-----|
| Molecular Modeling .....                                 | S2  |
| Structure Activity Relationship (SAR) .....              | S4  |
| General Experimental Conditions .....                    | S7  |
| Synthetic Procedures .....                               | S8  |
| - General procedure for amid coupling .....              | S11 |
| - General procedure for Sonogashira cross-coupling ..... | S15 |
| Biological Assays .....                                  | S20 |
| Analytical Data .....                                    | S24 |
| - NMR spectra.....                                       | S24 |
| - ESI-TOF-HRMS.....                                      | S62 |
| - IR spectra .....                                       | S70 |
| - HPLC – Purity .....                                    | S78 |
| - Elemental analysis.....                                | S81 |
| References.....                                          | S83 |

## Molecular Modeling

All molecular modeling experiments were performed using the Molecular Operating Environment (MOE) software (Versions: 2012.10 and 2013.08) from Chemical Computing Group (<http://www.chemcomp.com>).<sup>[1]</sup> The co-crystal structure 2OW9<sup>[2]</sup> was obtained as PDB-file from the RCSB Protein Data Bank (<http://www.rcsb.org>),<sup>[3]</sup> loaded to MOE, reduced to a monomer and prepared by calculating the protonation using the *Protonate 3D* application with default settings (Temperature = 300 K, pH = 7, Salt = 0.1). New ligands were loaded to MOE as 2D structures from SD-files. The 3D coordinates were calculated using the *Rebuild3D* application with default settings (RMSD gradient = 0.1). Even though the calculation of the 3D coordinates produces a local minimum of the molecular energy of the ligands, a further minimization was performed using the energy minimize application. The docking experiments were carried out applying the MMFF94x force field and the triangle matcher placement. All ligands were docked against the co-crystal structure (incl. water molecules; without the water molecules 747, 836 and 915 for docking experiments of compound 4).

### Probing the MMP-13 S1'-binding site by uracil

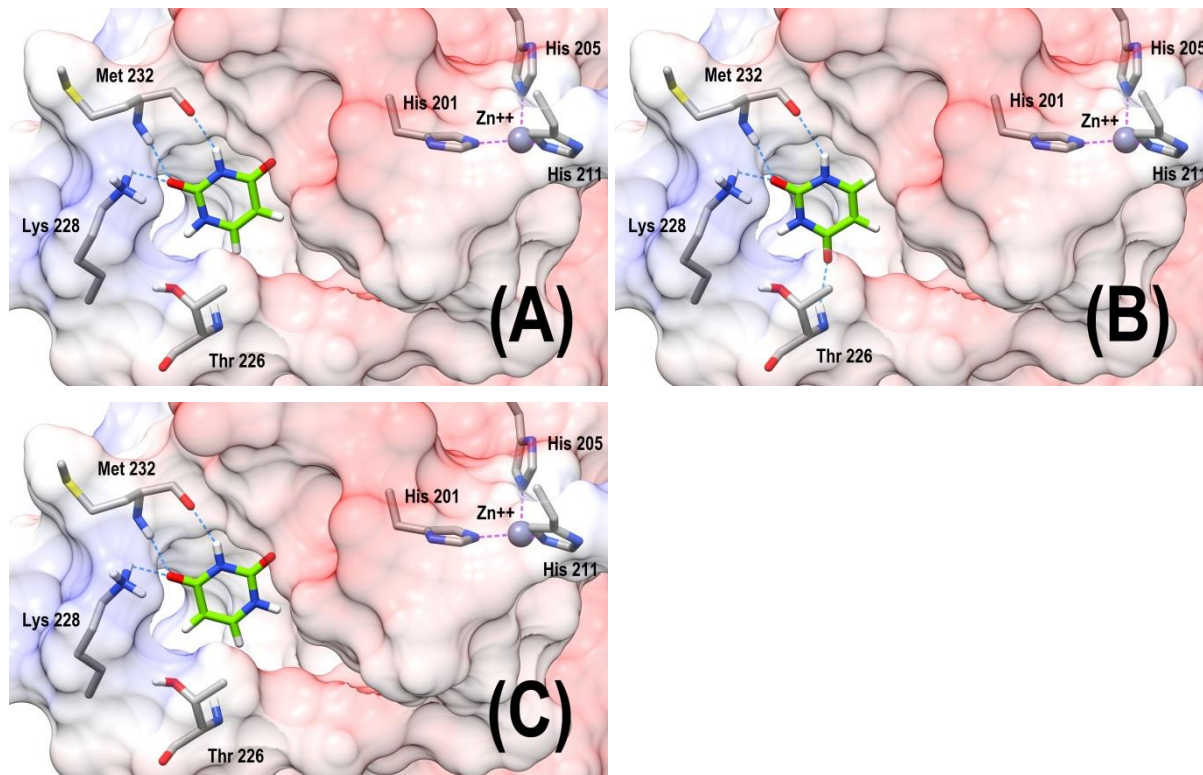

**Figure S1:** Top-ranked poses of uracil (A, B, C) showing the binding motif which addresses the Met232 backbone NH/CO and the side chain amino functionality of Lys228; color code: C (protein): gray; C (inhibitor scaffold): green; N: blue; O: red. Pose A was used for the *de novo* design approach. Molecular models were generated with MOE; Images were generated with CHIMERA;<sup>[4]</sup> (MMP-13 PDB code: 2OW9).

## De novo design approach from uracil to scaffold 2

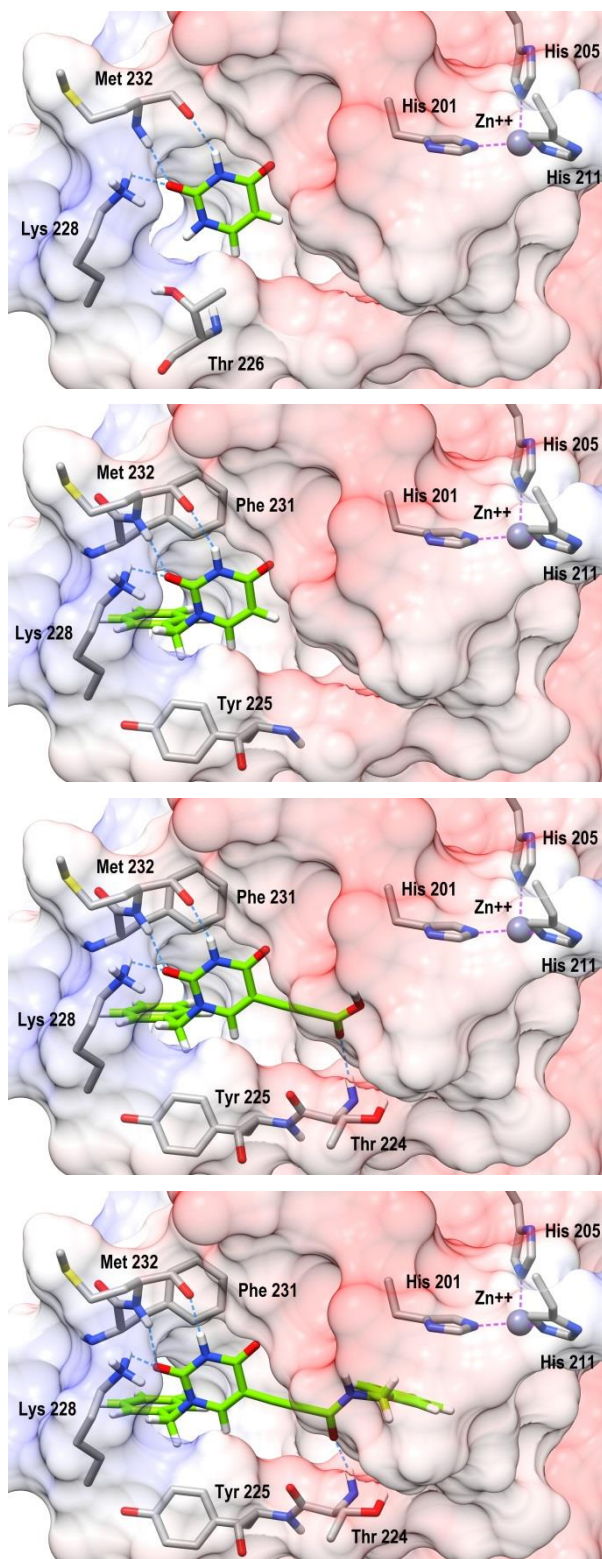

Uracil as NPDF interacts via its *cis* amide bonds with the backbone NH and CO of Met232, as well as the side chain amino group of Lys228 in the top ranked poses.

After a thorough investigation of the binding site for possible binding partners and the vectors provided by the uracil fragment for synthetic modifications, we introduced a benzylic group by N1-alkylation of the uracil in order to interact with the aromatic side chains of Tyr225 and Phe231 via CH- $\pi$  interactions. The top-ranked pose for this elongation shows the unique H-bonding pattern to Met232 as well as the intended CH- $\pi$  interactions in a sandwich-type binding orientation.

Consequently, we aimed to bind deeper into the S1'-binding site of the target protein to further improve the affinity of the emerging inhibitor. C5 of the uracil fragment offered an attractive vector to take advantage of the linear S1'-binding site by the introduction of a linear propionic acid fragment addressing the backbone NH of Thr224 via the carboxylic acid of the emerging inhibitor.

Adding a benzyl amine to the carboxylic acid terminus in order to interact with His201 via  $\pi$ - $\pi$ -interaction, furnished the final scaffold of our design approach. Again, the top-ranked poses confirmed all the intended interactions between the de novo designed inhibitor scaffold and the target protein.

**Figure S2:** *De novo* design approach from uracil to scaffold 2; color code: C (protein): gray; C (inhibitor scaffold): green; N: blue; O: red. Molecular models were generated with MOE; images were generated with CHIMERA; (MMP-13 PDB code: 2OW9).

## Structure Activity Relationship (SAR)

A directed compound library was designed, synthesized, and tested *in vitro* against MMP-13 in order to verify the docked binding motif of the scaffold **2** (not all data shown). The top ranked poses in the docking experiments of all library compounds showed the same binding motif as the scaffold **2**. Though, the inhibitory potency of all compounds containing a substituent in the *ortho*-position on the benzyl group on the right hand side of the scaffold was eliminated completely at  $c(\text{inhibitor}) = 6.5 \mu\text{M}$ . These findings correlate consistently regarding the narrowness of the S1'-binding site close to the active site and the clashes that occurred between the docked poses of the library compounds and MMP-13, shown using the example of the three representative library compounds **9a-c**. (Table S1, Figure S3).

**Table S1:** MMP-13 single dose inhibition data.

| Compound  | Structure                                                                           | Inhibition <sup>[a]</sup> |
|-----------|-------------------------------------------------------------------------------------|---------------------------|
| <b>2</b>  | 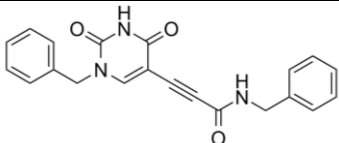  | 32 ± 9                    |
| <b>3</b>  |  | 100 ± 1                   |
| <b>9a</b> |  | -2 ± 10                   |
| <b>9b</b> |  | 32 ± 4                    |
| <b>9c</b> |  | 51 ± 2                    |

[a] Single dose values in % ± SD from one experiment measured in-house in triplicate at  $c(\text{inhibitor}) = 6.5 \mu\text{M}$ .



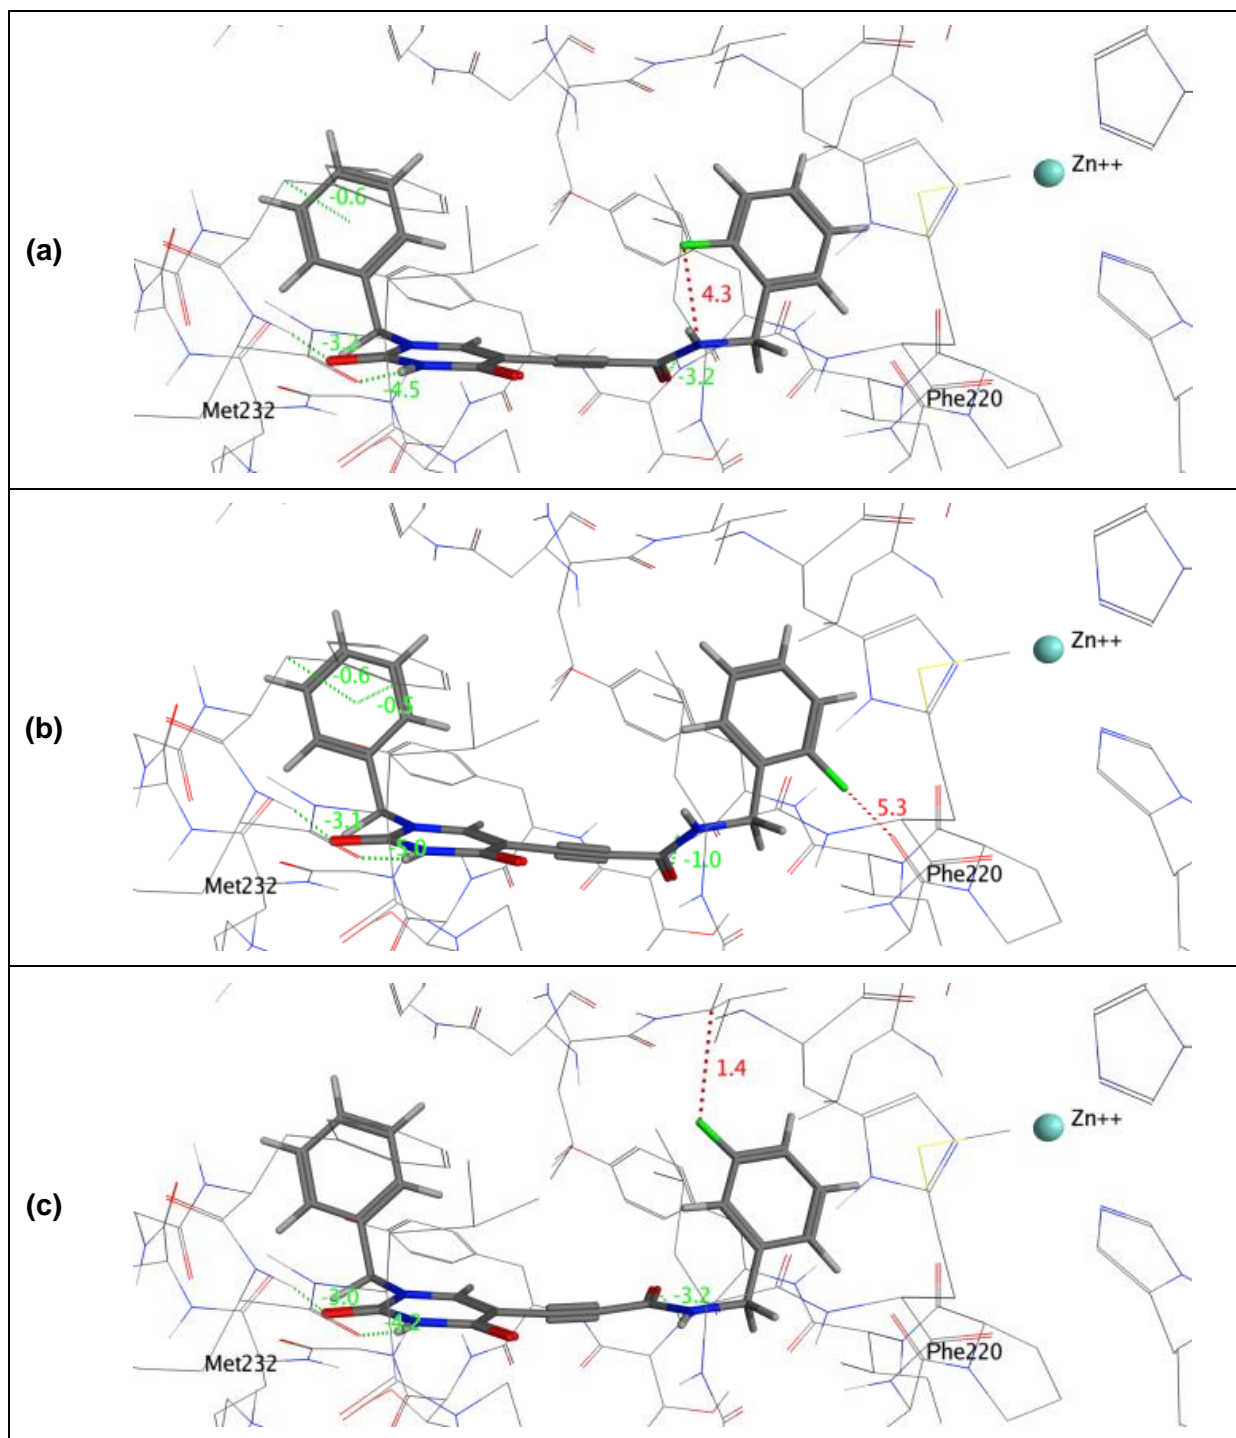

**Figure S3:** Top-ranked poses of **9a-c** showing the same binding motif as the scaffold **2**; Two possible conformations for **9a**: (a) Intramolecular clash between the fluoro atom and the amid group, (b) intermolecular clash between the fluoro atom and the backbone CO from Phe220; Two possible conformations for **9b**: (c) Weak clash between the fluoro atom and the backbone of Val198; (d) No interaction or clash of the fluoro atom; **9c**: (e) No interaction or clash of the fluoro atom; Color code: C (protein): gray; C (inhibitor): gray; N: blue; O: red. Molecular models and images were generated with MOE; Binding energies (green) and clashes (red) were calculated with MOE, values in kcal/mol; (MMP-13 PDB code: 2OW9).

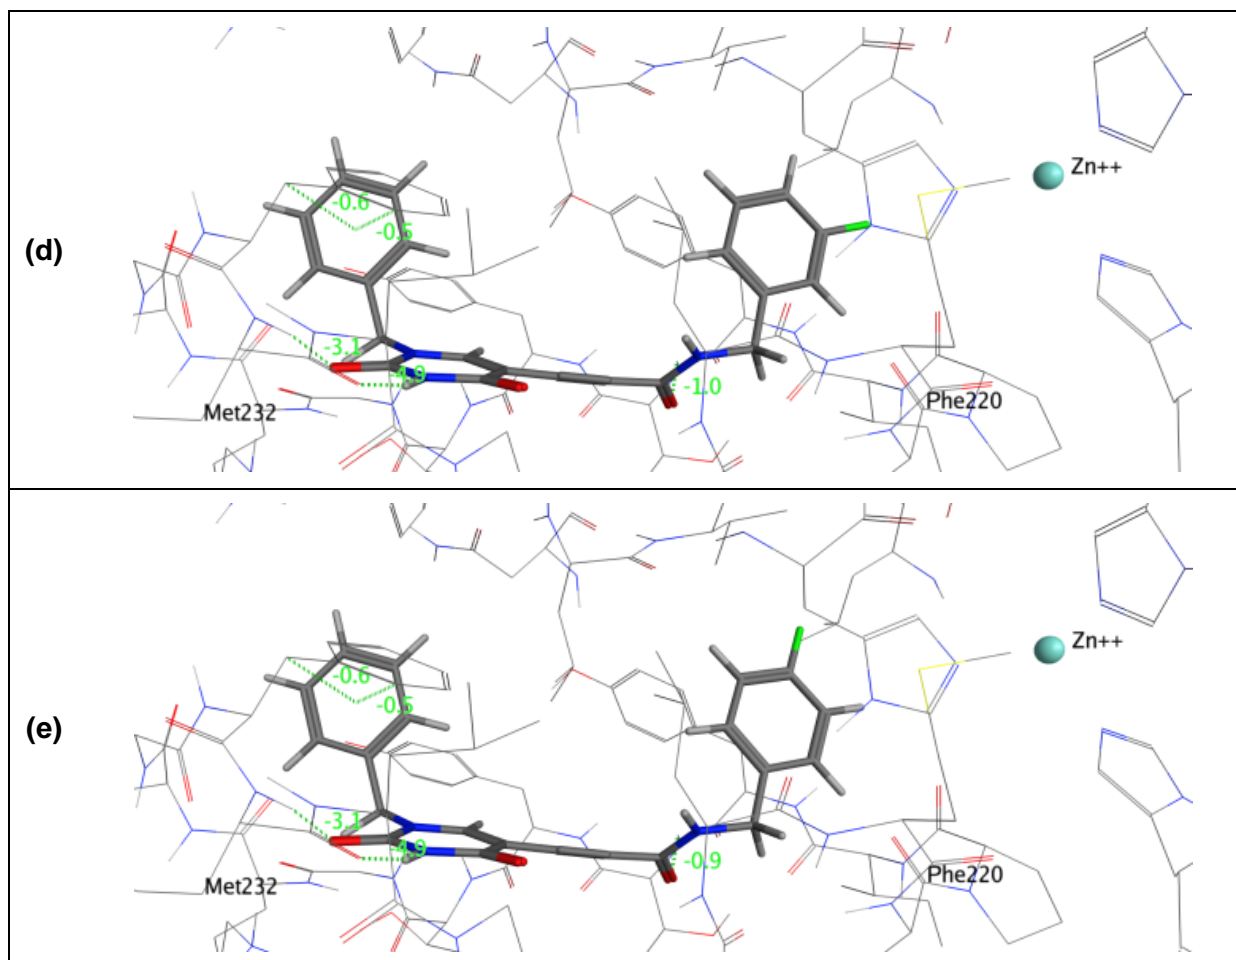

**Figure S3 (continued):** Top-ranked poses of **9a-c** showing the same binding motif as the scaffold **2**; Two possible conformations for **9a**: (a) Intramolecular clash between the fluoro atom and the amid group, (b) intermolecular clash between the fluoro atom and the backbone CO from Phe220; Two possible conformations for **9b**: (c) Weak clash between the fluoro atom and the backbone of Val198; (d) No interaction or clash of the fluoro atom; **9c**: (e) No interaction or clash of the fluoro atom; Color code: C (protein): gray; C (inhibitor): gray; N: blue; O: red. Molecular models and images were generated with MOE; Binding energies (green) and clashes (red) were calculated with MOE, values in kcal/mol; (MMP-13 PDB code: 2OW9).

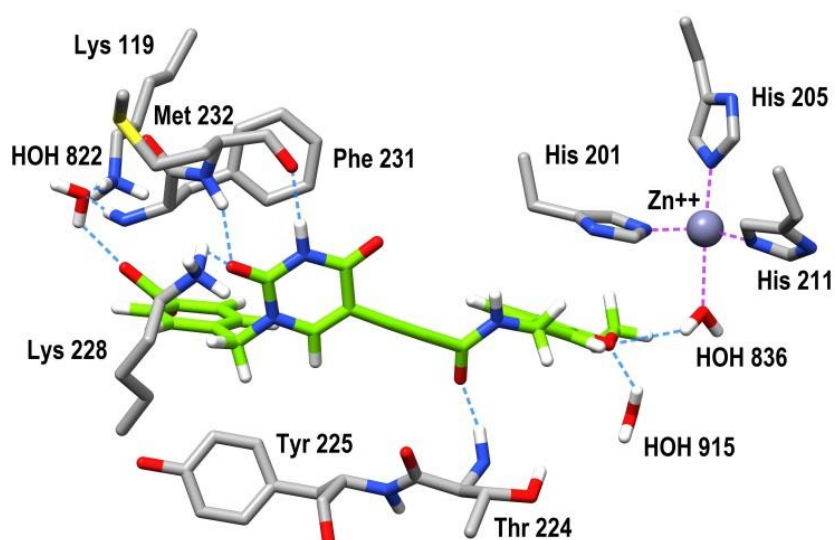

**Figure S4:** Inhibitor **3** targeting water-mediated interactions; Color code: C (protein): gray; C (inhibitor scaffold): green; N: blue; O: red. Molecular models were generated with MOE; images were generated with CHIMERA; (MMP-13 PDB code: 2OW9).

## General Experimental Conditions

Reagents and solvents were purchased from commercial suppliers and used without further purification. Solvents for water free reactions were stored over molecular sieves 4 Å. All microwave assisted reactions were carried out with a Biotage Initiator. Normal-phase (solid phase: silica gel, liquid phase: cyclohexane/ethyl acetate) and reversed-phase (solid phase: C18-reversed phase silica gel, liquid phase: H<sub>2</sub>O/MeOH) column chromatography were performed on a Teledyne ISCO CombiFlash Rf system equipped with RediSep Rf columns. NMR spectra were recorded on a Bruker Avance 800 NMR spectrometer (800 MHz for <sup>1</sup>H NMR, 201 MHz for <sup>13</sup>C NMR), on a Bruker Avance 700 NMR spectrometer (700 MHz for <sup>1</sup>H NMR, 176 MHz for <sup>13</sup>C NMR) or on a Bruker Avance 300 NMR spectrometer (300 MHz for <sup>1</sup>H NMR, 75 MHz for <sup>13</sup>C NMR) with chemical shifts reported in ppm relative to the residual solvent peak (DMSO-d<sub>6</sub>, <sup>1</sup>H NMR δ = 2.50 ppm; <sup>13</sup>C NMR δ = 39.52 ppm). <sup>1</sup>H and <sup>13</sup>C NMR data are reported as follows: Chemical shift, multiplicity (s = singlet, d = doublet, t = triplet, quin = quintet, m = multiplet, ps. = pseudo), coupling constants (Hz) and integration. High-resolution mass spectrometry was performed on an Agilent Technologies 6530 Q-TOF. Infrared spectra were recorded on a Bruker Tensor 37 device equipped with an ATR Golden Gate measuring unit. Melting points were measured on a BUCHI Melting Point M-565. The purity of the compounds was determined by HPLC using an Agilent 1200 Series system equipped with an Interchim Uptisphere Strategy C18-2, 5µm, 4.6 x 250mm HPLC column and diode array detector. A standard method was used with conditions as follows: Eluent A: H<sub>2</sub>O/MeOH (95:5, v/v) + 0.2 % acetic acid and eluent B: H<sub>2</sub>O/MeOH (5:95, v/v) + 0.2 % acetic acid (Table S2); Column temperature ϑ = 40 °C.

**Table S2:** HPLC Gradient

| Time [min] | Flow [mL/min] | Eluent A [%] | Eluent B [%] |
|------------|---------------|--------------|--------------|
| 0.0        | 1             | 100          | 0            |
| 10.0       | 1             | 0            | 100          |
| 18.0       | 1             | 0            | 100          |
| 18.1       | 1             | 100          | 0            |
| 20.0       | 1             | 100          | 0            |



## Synthetic Procedures

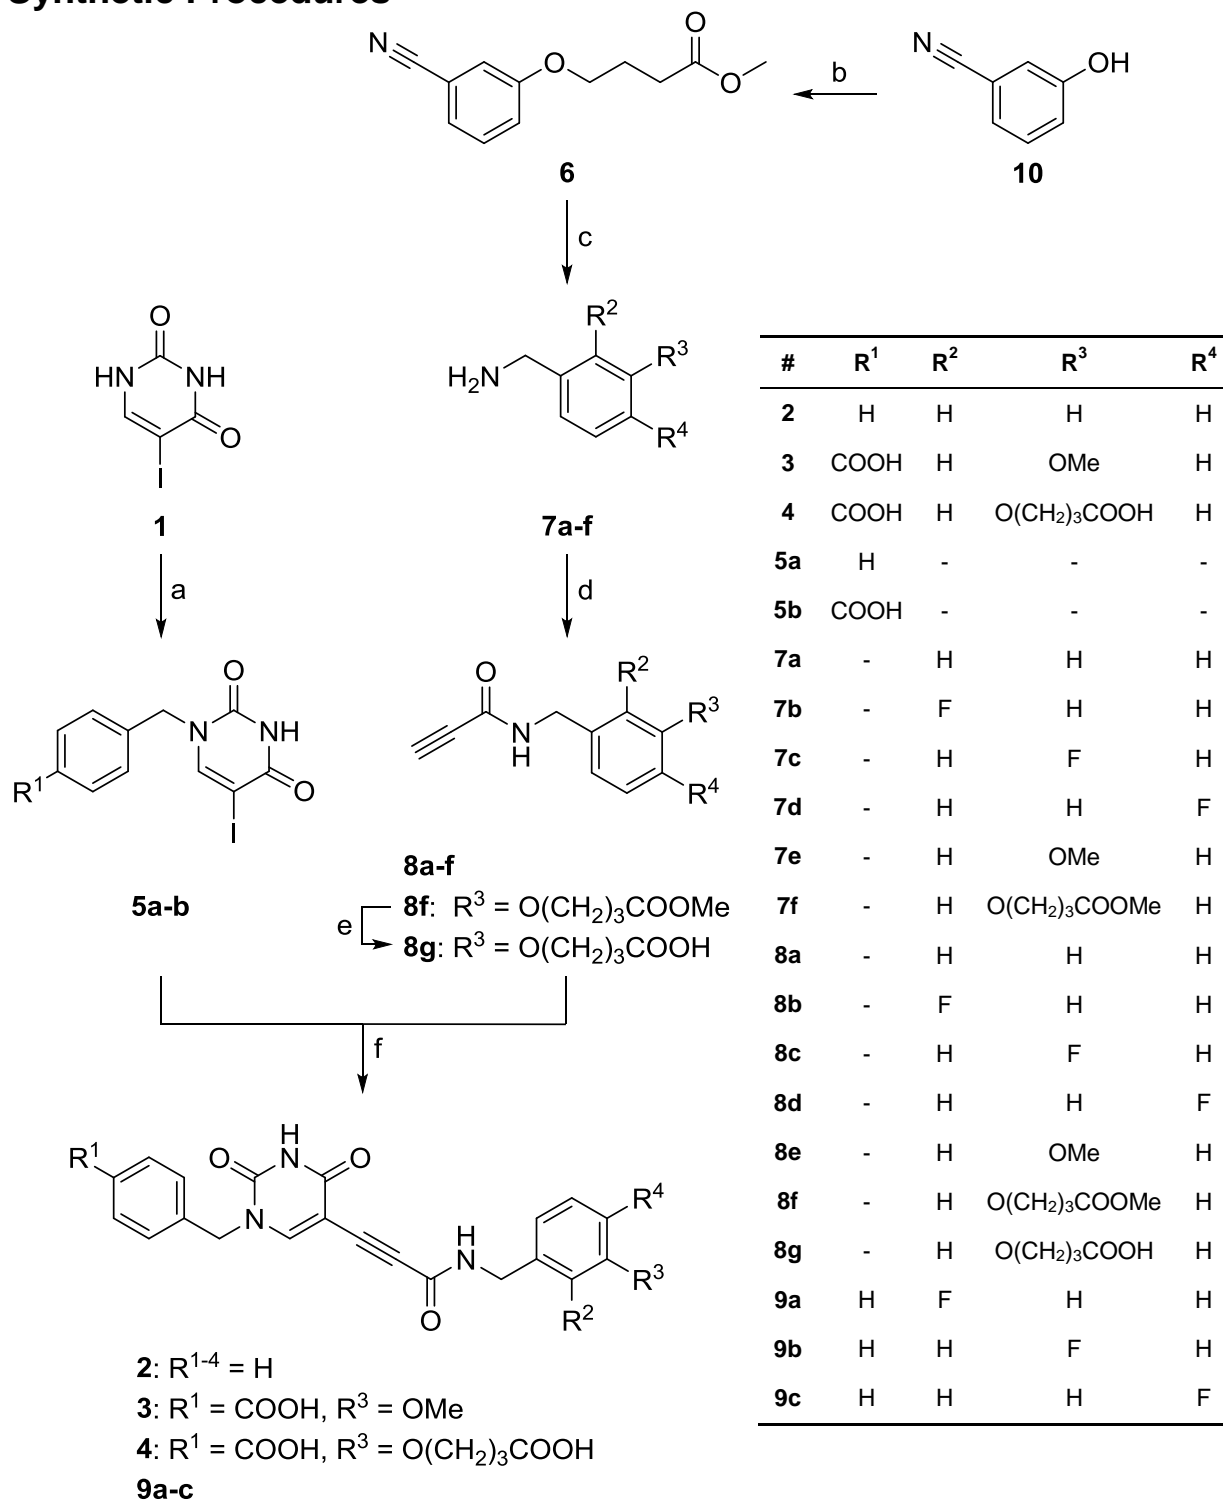

**Scheme S1.** Synthesis of the *de novo* uracil-based inhibitors. Reagents and conditions: a) BnBr / 4-(Bromomethyl)benzoic acid (1.0 eq.), Cs<sub>2</sub>CO<sub>3</sub> (1.05 eq.), DMF, rt, 4 h; b) Methyl 4-bromobutyrate (1.1 eq.), K<sub>2</sub>CO<sub>3</sub> (1.5 eq.), DMF, 100 °C, 2 h; c) Pd/C 10% (0.05 eq.), H<sub>2</sub>, HCl 32 %, MeOH, rt, 2 h; d) Propionic acid (1.5 eq.), EEDQ (1.5 eq.), CH<sub>2</sub>Cl<sub>2</sub>, N<sub>2</sub>, rt, overnight; e) LiOH (2 eq.), THF/H<sub>2</sub>O (4:1), rt, 3 h; f) Pd(PPh<sub>3</sub>)<sub>4</sub> (0.1 eq.), Cul (0.2 eq.), TEA, DMF, N<sub>2</sub>, rt, 2 h.

### 1-Benzyl-5-iodo-1,2,3,4-tetrahydropyrimidine-2,4-dione<sup>[5]</sup> (5a)

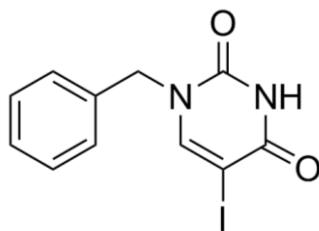

Anhydrous cesium carbonate (6.55 g, 20.3 mmol, 1.05 eq.) was added to a solution of 5-iodouracil (**1**) (4.60 g, 19.3 mmol, 1.00 eq.) in anhydrous DMF (70 mL). The suspension was stirred vigorously at ambient temperature for 1 h. A solution of a benzyl bromide (3.24 g, 19.3 mmol, 1.00 eq.) in anhydrous DMF (10 mL) was added dropwise and the mixture was stirred for another 3 h at ambient temperature. Water (200 mL) was added and the solution was acidified with 2 M HCl. The mixture was extracted with ethyl acetate. The combined organic phase was washed with water and brine, dried over Na<sub>2</sub>SO<sub>4</sub> and concentrated under reduced pressure. The crude product was purified by reversed-phase flash chromatography.

Yield: 1.76 g, 5.36 mmol, 28 %, colorless square plates; Purity: >99 %; mp 217-219 °C; <sup>1</sup>H NMR (300 MHz, DMSO-d<sub>6</sub>): δ = 11.67 (s, 1H), 8.32 (s, 1H), 7.40-7.28 (m, 5H), 4.88 (s, 2H); <sup>13</sup>C NMR (75 MHz, DMSO-d<sub>6</sub>): δ = 160.91, 150.67, 149.67, 136.60, 128.58 (2C), 127.67, 127.45 (2C), 68.54, 50.44; IR (ATR): ν̄ = 3147, 3112, 3076, 2992, 2824, 1707, 1647, 1608, 1451, 1421, 1338, 882, 729, 691 cm<sup>-1</sup>; HPLC: *t*<sub>R</sub> 12.07 min; ESI-TOF-HRMS: *m/z* 328.9777 [M + H]<sup>+</sup>, calculated for C<sub>11</sub>H<sub>9</sub>IN<sub>2</sub>O<sub>2</sub> 327.9709, found: 327.9705.

### 4-[(5-Iodo-2,4-dioxo-1,2,3,4-tetrahydropyrimidin-1-yl)methyl]benzoic acid (5b)

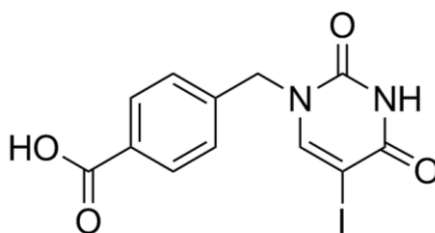

Anhydrous cesium carbonate (2.85 g, 8.82 mmol, 1.05 eq.) was added to a solution of 5-iodouracil (**1**) (10.0 g, 42.02 mmol, 5.0 eq.) in anhydrous DMF (200 mL). The suspension was stirred vigorously at ambient temperature for 1 h. A solution of a 4-(bromomethyl)benzoic acid (1.75 g, 8.40 mol, 1.00 eq.) in anhydrous DMF (50 mL) was added dropwise and the mixture was stirred for another 3 h at ambient temperature. Water (200 mL) was added and the solution was acidified with 2 M HCl. The mixture was extracted

with ethyl acetate. The combined organic phase was washed with water and brine, dried over  $\text{Na}_2\text{SO}_4$  and concentrated under reduced pressure. The crude product was purified by reversed-phase flash chromatography.

Yield: 0.63 g, 1.70 mmol, 20 %, colorless crystals; Purity: >99 %; dp 300 °C;  $^1\text{H}$  NMR (300 MHz, DMSO- $d_6$ ):  $\delta$  = 12.96 (s, 1H), 11.73 (s, 1H), 8.36 (s, 1H), 7.92 (d,  $J$  = 8.3 Hz, 2H), 7.40 (d,  $J$  = 8.3 Hz, 2H), 4.95 (s, 2H);  $^{13}\text{C}$  NMR (75 MHz, DMSO- $d_6$ ):  $\delta$  = 166.99, 161.05, 150.73, 149.78, 141.59, 130.08, 129.64 (2C), 127.40 (2C), 68.90, 50.38; IR (ATR):  $\tilde{\nu}$  = 3071, 2999, 2833, 2561, 1725, 1650, 1603, 1574, 1421, 1324, 1281, 1243, 1184, 889, 748, 619  $\text{cm}^{-1}$ ; HPLC:  $t_R$  10.19 min; ESI-TOF-HRMS:  $m/z$  372.9665 [ $\text{M} + \text{H}$ ] $^+$ , calculated for  $\text{C}_{12}\text{H}_9\text{IN}_2\text{O}_4$  371.9607, found: 371.9593.

### Methyl 4-(3-cyanophenoxy)butanoate (6)

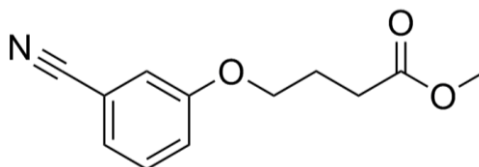

3-Cyanophenol (**10**) (1.00 g, 8.39 mmol, 1.0 eq.), methyl 4-bromobutyrate (1.67 g, 9.23 mmol, 1.1 eq.), anhydrous potassium carbonate (1.74 g, 12.59 mmol, 1.5 eq.) and anhydrous DMF (20 mL) were mixed in a microwave tube with a magnetic stir bar, sealed with a septum, and heated in a microwave at 100 °C for 2 h. After cooling down, the reaction mixture was diluted with ethyl acetate and washed with water and brine, dried over  $\text{Na}_2\text{SO}_4$  and concentrated under reduced pressure. The crude product was purified by normal-phase flash chromatography.

Yield: 1.54 g, 7.01 mmol, 83 %, yellow oil; Purity: >99 %;  $^1\text{H}$  NMR (300 MHz, DMSO- $d_6$ ):  $\delta$  = 7.50-7.45 (m, 1H), 7.40-7.36 (m, 2H), 7.27 (ddd,  $J$  = 8.3 Hz,  $J$  = 2.5 Hz,  $J$  = 1.3 Hz, 1H), 4.05 (t,  $J$  = 6.4 Hz, 2H), 3.60 (s, 3H), 2.47 (t,  $J$  = 7.4 Hz, 2H), 1.97 (ps. quin,  $J$  = 6.6 Hz, 2H);  $^{13}\text{C}$  NMR (75 MHz, DMSO- $d_6$ ):  $\delta$  = 172.91, 158.55, 130.82, 124.47, 120.28, 118.62, 117.27, 112.22, 67.06, 51.33, 29.80, 23.96; IR (ATR):  $\tilde{\nu}$  = 2953, 2359, 2230, 1736, 1598, 1579, 1436, 1263, 1048, 888, 792, 684, 631  $\text{cm}^{-1}$ ; HPLC:  $t_R$  12.04 min.

### Methyl 4-[3-(aminomethyl)phenoxy]butanoate (7f)

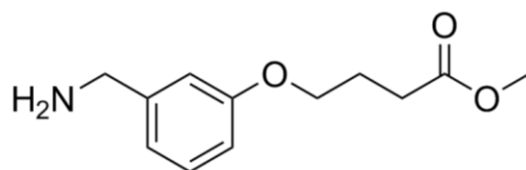

Methyl 4-(3-cyanophenoxy)butanoate (**6**) (1.00 g, 4.56 mmol, 1.0 eq.) was dissolved in MeOH (20 mL) under N<sub>2</sub> atmosphere. Palladium on active charcoal 10% (0.25 g, 0.23 mmol, 0.05 eq.) and 0.5 mL HCl 32 % were added to the stirred solution. The mixture was then stirred under H<sub>2</sub> atmosphere for 2 h at ambient temperature. The catalyst was filtered off and the solvent was removed from the filtrate under reduced pressure. The crude product was dissolved in water and the pH was adjusted to 8 with aqueous NaHCO<sub>3</sub> 10 %. The mixture was extracted with ethyl acetate. The combined organic phase was washed with water and brine, dried over Na<sub>2</sub>SO<sub>4</sub> and concentrated under reduced pressure. The product was used for the next step without further purification.

Yield: 0.66 g, 2.96 mmol, 65 %, yellow oil; <sup>1</sup>H NMR (300 MHz, DMSO-d<sub>6</sub>): δ = 7.20 (t, *J* = 7.8 Hz, 1H), 6.97-6.83 (m, 2H), 6.75 (ddd, *J* = 8.2 Hz, *J* = 2.6 Hz, *J* = 1.0 Hz, 1H), 3.97 (t, *J* = 6.3 Hz, 2H), 3.70 (s, 2H), 3.61 (s, 3H), 2.47 (t, *J* = 7.3 Hz, 2H), 1.97 (ps. quin, *J* = 6.7 Hz, 2H); <sup>13</sup>C NMR (75 MHz, DMSO-d<sub>6</sub>): δ = 173.01, 158.46, 144.86, 129.09, 119.40, 113.21, 112.37, 66.27, 51.32, 45.21, 29.94, 24.26; HPLC: *t*<sub>R</sub> 7.5 min; ESI-TOF-HRMS: *m/z* 224.1275 [M + H]<sup>+</sup>, calculated for C<sub>12</sub>H<sub>17</sub>NO<sub>3</sub> 223.1208, found: 223.1203.

### General procedure for amid coupling

Propiolic acid (1.5 eq.) was added dropwise to a stirred solution of EEDQ (1.5 eq.) and benzyl amine reactant (1.0 eq) in CH<sub>2</sub>Cl<sub>2</sub> (15-20 mL/g benzyl amine reactant) at ambient temperature under N<sub>2</sub> atmosphere. The resulting mixture was stirred overnight at ambient temperature. Water (50 mL) was added and the solution was acidified with 2 M HCl. The mixture was extracted with CH<sub>2</sub>Cl<sub>2</sub>. The combined organic phase was washed with 1 M HCl, water and brine, dried over Na<sub>2</sub>SO<sub>4</sub> and concentrated under reduced pressure. The crude product was purified by reversed-phase flash chromatography.

### ***N*-Benzylprop-2-ynamide<sup>[6]</sup> (8a)**

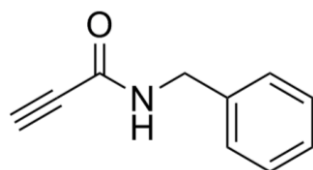

Yield: 2.27 g, 14.24 mmol, 78 %, colorless needles; Purity: >99 %; mp 92-94 °C; <sup>1</sup>H NMR (300 MHz, DMSO-d<sub>6</sub>): δ = 9.25 (t, *J* = 6.1 Hz, 1H), 7.36-7.23 (m, 5H), 4.29 (d, *J* = 6.1 Hz, 2H), 4.17 (s, 1H); <sup>13</sup>C NMR (75 MHz, DMSO-d<sub>6</sub>): δ = 151.65, 138.49, 128.34 (2C), 127.29 (2C), 126.98, 78.16, 76.01, 42.27; IR (ATR):  $\tilde{\nu}$  = 3201, 3062, 2106, 1616, 1556, 1293, 1001, 748, 725, 696 cm<sup>-1</sup>; HPLC: *t<sub>R</sub>* 11.26 min; ESI-TOF-HRMS: *m/z* 160.0751 [M + H]<sup>+</sup>, calculated for C<sub>10</sub>H<sub>9</sub>NO 159.0684, found: 159.0678.

### ***N*-[(2-Fluorophenyl)methyl]prop-2-ynamide (8b)**

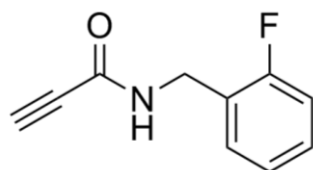

Yield: 0.33 g, 1.87 mmol, 43 %, colorless needles; Purity: >99 %; mp 90-92 °C; <sup>1</sup>H NMR (300 MHz, DMSO-d<sub>6</sub>): δ = 9.22 (t, *J* = 5.9 Hz, 1H), 7.37-7.29 (m, 2H), 7.20-7.14 (m, 2H), 4.34 (d, *J* = 5.9 Hz, 2H), 4.15 (s, 1H); <sup>13</sup>C NMR (75 MHz, DMSO-d<sub>6</sub>): δ = 159.96 (d, *J* = 244.9 Hz), 129.66 (d, *J* = 4.3 Hz), 129.14 (d, *J* = 8.1 Hz), 124.95 (d, *J* = 14.8 Hz), 124.30 (d, *J* = 3.5 Hz), 115.09 (d, *J* = 21.2 Hz), 77.96, 76.08, 36.14 (d, *J* = 4.5 Hz); <sup>19</sup>F NMR (282 MHz, DMSO-d<sub>6</sub>): δ = - 118.72-118.81 (m); IR (ATR):  $\tilde{\nu}$  = 3229, 3069, 2108, 1653, 1617, 1588, 1551, 1488, 1456, 1436, 1274, 1229, 1181, 1108, 996, 843, 755, 697 cm<sup>-1</sup>; HPLC: *t<sub>R</sub>* 11.41 min; ESI-TOF-HRMS: *m/z* 178.0658 [M + H]<sup>+</sup>, calculated for C<sub>10</sub>H<sub>8</sub>FNO: 177.0590, found: 177.0586.

### ***N*-[(3-Fluorophenyl)methyl]prop-2-ynamide (8c)**

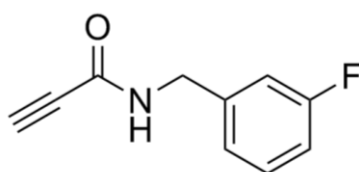

Yield: 0.25 g, 1.43 mmol, 33 %, colorless needles; Purity: >99 %; mp 75-77 °C; <sup>1</sup>H NMR (300 MHz, DMSO-d<sub>6</sub>): δ = 9.25 (t, *J* = 6.1 Hz, 1H), 7.41-7.34 (m, 1H), 7.11-7.05 (m, 3H), 4.31 (d, *J* = 6.1 Hz, 2H), 4.17 (s, 1H); <sup>13</sup>C NMR (75 MHz, DMSO-d<sub>6</sub>): δ = 162.12 (d, *J* = 243.5 Hz), 151.70, 141.40 (d, *J* = 7.4 Hz), 130.28 (d, *J* = 8.3 Hz), 123.21 (d, *J* = 2.7 Hz), 113.90 (d, *J* = 21.6 Hz), 113.71 (d, *J* = 20.9 Hz), 77.98, 76.15, 41.76 (d, *J* = 1.8 Hz); <sup>19</sup>F NMR (282 MHz, DMSO-d<sub>6</sub>): δ = -113.44 (td, *J* = 9.7 Hz, *J* = 6.2 Hz); IR (ATR):  $\tilde{\nu}$  = 3281, 3214, 3065, 2106, 1659, 1632, 1615, 1591, 1540, 1485, 1449, 1421, 1359, 1279, 1265, 1236, 1138, 1026, 945, 780, 758, 728, 680 cm<sup>-1</sup>; HPLC: *t<sub>R</sub>* 11.54 min; ESI-TOF-HRMS: *m/z* 178.0658 [M + H]<sup>+</sup>, calculated for C<sub>10</sub>H<sub>8</sub>FNO: 177.0590, found: 177.0586.

#### ***N*-[(4-Fluorophenyl)methyl]prop-2-ynamide (8d)**

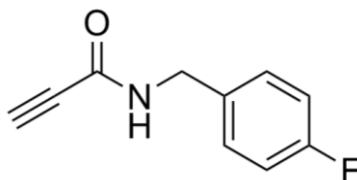

Yield: 0.21 g, 1.17 mmol, 27 %, colorless needles; Purity: >99 %; mp 77-79 °C; <sup>1</sup>H NMR (300 MHz, DMSO-d<sub>6</sub>): δ = 9.22 (t, *J* = 6.1 Hz, 1H), 7.32-7.25 (m, 2H), 7.19-7.11 (m, *J* = 9.0 Hz, 2H), 4.27 (d, *J* = 6.1 Hz, 2H), 4.15 (s, 1H); <sup>13</sup>C NMR (75 MHz, DMSO-d<sub>6</sub>): δ = 161.21 (d, *J* = 242.5 Hz), 151.60, 134.66 (d, *J* = 3.1 Hz), 129.30 (d, *J* = 8.2 Hz, 2C), 115.02 (d, *J* = 21.3 Hz, 2C), 78.06, 76.00, 41.55; <sup>19</sup>F NMR (282 MHz, DMSO-d<sub>6</sub>): δ = -115.85 (tt, *J* = 9.1 Hz, *J* = 5.6 Hz); IR (ATR):  $\tilde{\nu}$  = 3288, 3040, 2360, 2325, 2114, 1622, 1527, 1509, 1259, 1219, 1159, 836, 682, 665 cm<sup>-1</sup>; HPLC: *t<sub>R</sub>* 11.57 min; ESI-TOF-HRMS: *m/z* 178.0655 [M + H]<sup>+</sup>, calculated for C<sub>10</sub>H<sub>8</sub>FNO: 177.0590, found: 177.0583.

#### ***N*-[(3-Methoxyphenyl)methyl]prop-2-ynamide (8e)**

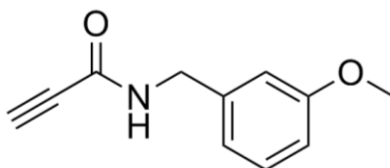

Yield: 0.99 g, 5.25 mmol, 68 %, colorless crystals; Purity: >99 %; mp 63-65 °C; <sup>1</sup>H NMR (300 MHz, DMSO-d<sub>6</sub>): δ = 9.23 (t, *J* = 5.7 Hz, 1H), 7.28-7.20 (m, 1H), 6.85-6.79 (m, 3H), 4.26 (d, *J*



= 6.1 Hz, 2H), 4.16 (s, 1H), 3.74 (s, 3H);  $^{13}\text{C}$  NMR (75 MHz, DMSO- $d_6$ ):  $\delta$  = 159.30, 151.66, 140.06, 129.44, 119.42, 112.99, 112.36, 78.15, 76.04, 54.98, 42.21; IR (ATR):  $\tilde{\nu}$  = 3265, 3053, 2110, 1641, 1603, 1543, 1282, 1261, 1164, 1032, 789, 689  $\text{cm}^{-1}$ ; HPLC:  $t_R$  10.97 min; ESI-TOF-HRMS:  $m/z$  190.0853  $[\text{M} + \text{H}]^+$ , calculated for  $\text{C}_{11}\text{H}_{11}\text{NO}_2$  189.0790, found: 189.0780.

#### Methyl 4-[3-(prop-2-ynamidomethyl)phenoxy]butanoate (**8f**)

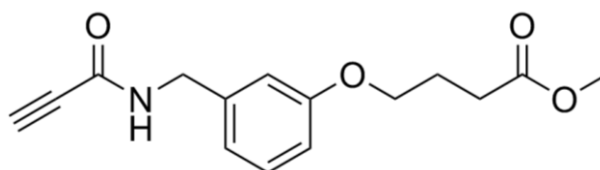

Yield: 0.52 g, 1.90 mmol, 85 %, yellow oil; Purity: >95 %;  $^1\text{H}$  NMR (300 MHz, DMSO- $d_6$ ):  $\delta$  = 9.22 (t,  $J$  = 6.0 Hz, 1H), 7.27-7.16 (m, 1H), 6.84-6.75 (m, 3H), 4.25 (d,  $J$  = 6.1 Hz, 2H), 4.17 (s, 1H), 3.96 (t,  $J$  = 6.3 Hz, 2H), 3.61 (s, 3H), 2.47 (t,  $J$  = 7.3 Hz, 2H), 1.97 (m, 2H);  $^{13}\text{C}$  NMR (75 MHz, DMSO- $d_6$ ):  $\delta$  = 173.00, 158.48, 151.64, 140.07, 129.43, 119.48, 113.51, 112.81, 78.14, 76.05, 66.36, 51.32, 42.18, 29.94, 24.22; IR (ATR):  $\tilde{\nu}$  = 3280, 2918, 2360, 2109, 1734, 1652, 1541, 1456, 1266, 1172, 1053, 892, 631  $\text{cm}^{-1}$ ; HPLC:  $t_R$  11.83 min; ESI-TOF-HRMS:  $m/z$  276.1225  $[\text{M} + \text{H}]^+$ , calculated for  $\text{C}_{15}\text{H}_{17}\text{NO}_4$ : 275.1158, found: 275.1153.

#### 4-[3-(Prop-2-ynamidomethyl)phenoxy]butanoic acid (**8g**)

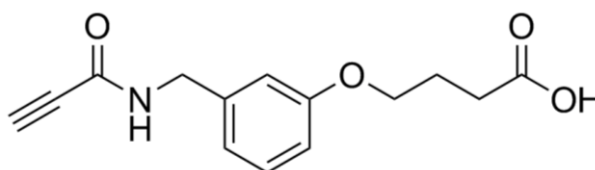

Lithium hydroxide monohydrate (0.62 g, 14.75 mmol, 2 eq.) was added to a stirred solution of **8f** (2.03 g, 7.37 mmol, 1 eq.) in THF (60 mL) and water (15 mL) at 0 °C. The reaction mixture was allowed to warm ambient temperature and stirred for 3 h. The reaction mixture was concentrated under reduced pressure, neutralized with 1 M HCl and extracted with ethyl acetate. The combined organic phase was washed with water and brine, dried over  $\text{Na}_2\text{SO}_4$  and concentrated under reduced pressure. The crude product was purified by normal-phase flash chromatography.

Yield: 0.90 g, 3.46 mmol, 47 %, white solid; Purity: >99 %; mp 103-105 °C; <sup>1</sup>H NMR (300 MHz, DMSO-d<sub>6</sub>): δ = 12.15 (s, 1H), 9.23 (t, *J* = 6.1 Hz, 1H), 7.29-7.16 (m, 1H), 6.87-6.75 (m, 3H), 4.25 (d, *J* = 6.1 Hz, 2H), 4.18 (s, 1H), 3.95 (t, *J* = 6.4 Hz, 2H), 2.38 (t, *J* = 7.3 Hz, 2H), 1.93 (ps. quin, *J* = 6.9 Hz, 2H); <sup>13</sup>C NMR (75 MHz, DMSO-d<sub>6</sub>): δ = 174.07, 158.55, 151.64, 140.05, 129.44, 113.52, 112.85, 78.15, 76.08, 66.46, 42.19, 30.11, 24.25; IR (ATR):  $\tilde{\nu}$  = 3272, 2940, 2361, 2112, 1688, 1628, 1614, 1586, 1539, 1454, 1269, 1161, 1072, 1062, 1008, 924, 773, 711, 688, 670 cm<sup>-1</sup>; HPLC: *t<sub>R</sub>* 10.25 min; ESI-TOF-HRMS: *m/z* 262.1070 [M + H]<sup>+</sup>, calculated for C<sub>14</sub>H<sub>15</sub>NO<sub>4</sub>: 261.1001, found: 261.0998.

### General procedure for Sonogashira cross-coupling

The iodouracil intermediate (100 mg, 1.0 eq.) and the alkyne intermediate (1.5 eq.) were dissolved in anhydrous DMF (2 mL). Stirred, at ambient temperature and under N<sub>2</sub> atmosphere, Pd(PPh<sub>3</sub>)<sub>4</sub> (0.1 eq.), CuI (0.2 eq.) and triethylamine (0.5 mL) were added in succession. The resulting mixture was continued to stir for 2 h at ambient temperature. The reaction was quenched by adding water. The aqueous phase was acidified with 2 M HCl and extracted with DCM. The combined organic phase was washed with water and brine, dried over Na<sub>2</sub>SO<sub>4</sub> and concentrated under reduced pressure. The crude product was purified by reverse-phase flash chromatography and recrystallization from MeOH.

### *N*-Benzyl-3-(1-benzyl-2,4-dioxo-1,2,3,4-tetrahydropyrimidin-5-yl)prop-2-ynamide (2)

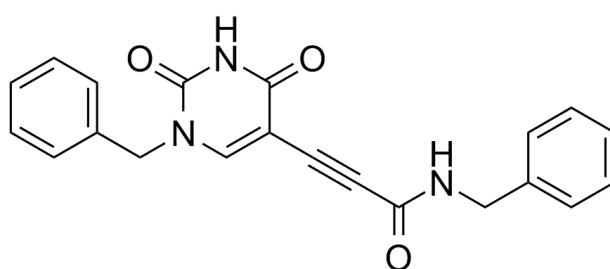

The iodouracil intermediate **5a** (300 mg, 0.91 mmol, 1.0 eq.) and the alkyne intermediate **8a** (218 mg, 1.37 mmol, 1.5 eq.) were dissolved in anhydrous DMF (4 mL) under N<sub>2</sub> atmosphere. Pd(PPh<sub>3</sub>)<sub>4</sub> (106 mg, 0.091 mmol, 0.1 eq.), CuI (35 mg, 0.183 mmol, 0.2 eq.) and triethylamine (1 mL) were added at 20 °C. The resulting mixture was continued to stir for 2 h at 20 °C. The reaction mixture was quenched by adding water. The aqueous phase was acidified with 2 M HCl and extracted with CH<sub>2</sub>Cl<sub>2</sub>. The organic phase was washed with water

and brine, dried over Na<sub>2</sub>SO<sub>4</sub> and concentrated under reduced pressure. The crude product was purified by reversed-phase flash chromatography and recrystallization from MeOH.

Yield: 121 mg, 0.34 mmol, 37 %, colorless crystals; Purity: >99 %; dp 195 °C; <sup>1</sup>H NMR (800 MHz, DMSO-d<sub>6</sub>): δ = 11.82 (s, 1H), 9.19 (t, *J* = 6.2 Hz, 1H), 8.43 (s, 1H), 7.38-7.35 (m, 2H), 7.34-7.30 (m, 5H), 7.27-7.23 (m, 3H), 4.92 (s, 2H), 4.31 (d, *J* = 6.2 Hz, 2H); <sup>13</sup>C NMR (201 MHz, DMSO-d<sub>6</sub>): δ = 161.57, 152.23, 151.55, 149.90, 138.74, 136.21, 128.70 (2C), 128.33 (2C), 127.89, 127.66 (2C), 127.33 (2C), 126.95, 95.47, 86.91, 77.50, 51.01, 42.36; IR (ATR):  $\tilde{\nu}$  = 3334, 3170, 3035, 2846, 2227, 1721, 1672, 1639, 1543, 1429, 1282, 1250, 1026, 969, 728, 696 cm<sup>-1</sup>; HPLC: *t<sub>R</sub>* 12.74 min; ESI-TOF-HRMS: *m/z* 382.1152 [M + Na]<sup>+</sup>, calculated for C<sub>21</sub>H<sub>17</sub>N<sub>3</sub>O<sub>3</sub>: 359.1270, found: 359.1259; Anal. calculated for C<sub>21</sub>H<sub>17</sub>N<sub>3</sub>O<sub>3</sub> [%]: C 70.18, H 4.77, N 11.69, found [%]: C 70.22, H 4.69, N 11.66.

**4-[[5-(2-[[3-methoxyphenyl)methyl]carbamoyl]eth-1-yn-1-yl)-2,4-dioxo-1,2,3,4-tetrahydropyrimidin-1-yl]methyl]benzoic acid (3)**

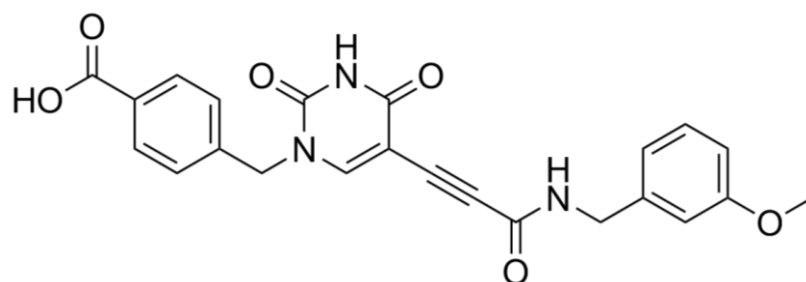

The iodouracil intermediate **5b** (250 mg, 0.67 mmol, 1.0 eq.) and the alkyne intermediate **8e** (191 mg, 1.01 mmol, 1.5 eq.) were dissolved in anhydrous DMF (4 mL) under N<sub>2</sub> atmosphere. Pd(PPh<sub>3</sub>)<sub>4</sub> (78 mg, 0.067 mmol, 0.1 eq.), CuI (26 mg, 0.134 mmol, 0.2 eq.) and triethylamine (1 mL) were added at 20 °C. The resulting mixture was continued to stir for 2 h at 20 °C. The reaction mixture was quenched by adding water. The resulting suspension was acidified with 2 M HCl. The precipitate was filtered off, washed with water, suspended in MeOH and cooled to -20 °C. Again the precipitate was filtered off and washed with cold MeOH. The crude product was purified by reversed-phase flash chromatography and recrystallization from MeOH.

Yield: 125 mg, 0.29 mmol, 43 %, white solid; Purity: >99 %; dp 207 °C; <sup>1</sup>H NMR (800 MHz, DMSO-d<sub>6</sub>): δ = 13.05 (s, 1H), 11.84 (s, 1H), 9.17 (t, *J* = 6.2 Hz, 1H), 8.46 (s, 1H), 7.93 (d, *J* = 8.3 Hz, 2H), 7.43 (d, *J* = 8.3 Hz, 2H), 7.25-7.23 (m, 1H), 6.83-6.81 (m, 3H), 4.99 (s, 2H), 4.28 (d, *J* = 6.2 Hz, 2H), 3.73 (s, 3H); <sup>13</sup>C NMR (201 MHz, DMSO-d<sub>6</sub>): δ = 167.11, 161.61, 159.30, 152.23, 151.66, 149.91, 140.99, 140.31, 130.51, 129.65 (2C), 129.43, 127.51 (2C), 119.46,

113.04, 112.31, 95.64, 86.94, 77.52, 55.00, 50.92, 42.32; IR (ATR):  $\tilde{\nu}$  = 3457, 3355, 3036, 2846, 2220, 1675, 1636, 1286, 1148, 1048, 779, 691  $\text{cm}^{-1}$ ; HPLC:  $t_R$  11.79 min; ESI-TOF-HRMS:  $m/z$  456.1157  $[\text{M} + \text{Na}]^+$ , calculated for  $\text{C}_{23}\text{H}_{19}\text{N}_3\text{O}_6$ : 433.1274, found: 433.1264; Anal. calculated for  $\text{C}_{23}\text{H}_{19}\text{N}_3\text{O}_6$  [%]: C 63.74, H 4.42, N 9.70, found [%]: C 63.73, H 4.37, N 9.81.

**4-({5-[2-({[3-(3-Carboxypropoxy)phenyl]methyl)carbamoyl]eth-1-yn-1-yl]-2,4-dioxo-1,2,3,4-tetrahydropyrimidin-1-yl)methyl)benzoic acid (4)**

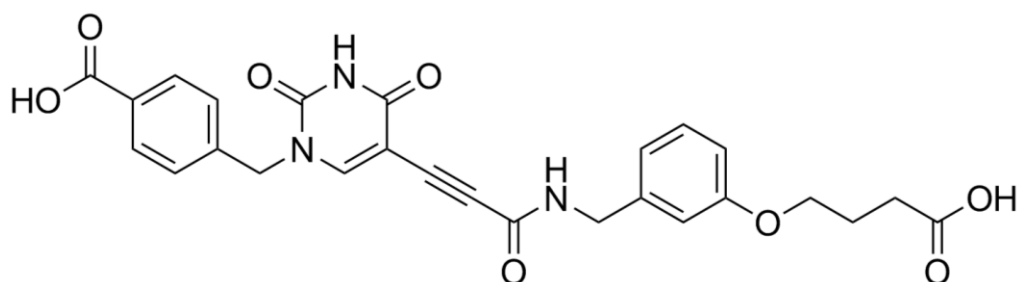

The iodouracil intermediate **5b** (550 mg, 1.48 mmol, 1.0 eq.) and the alkyne intermediate **8g** (405 mg, 1.55 mmol, 1.05 eq.) were dissolved in anhydrous DMF (8 mL) under  $\text{N}_2$  atmosphere.  $\text{Pd}(\text{PPh}_3)_4$  (171 mg, 0.15 mmol, 0.1 eq.),  $\text{CuI}$  (56 mg, 0.30 mmol, 0.2 eq.) and triethylamine (2 mL) were added at 20 °C. The resulting mixture was continued to stir for 4 h at 20 °C. The reaction mixture was quenched by adding water. The resulting suspension was acidified with 2 M HCl. The precipitate was filtered off, washed with water, suspended in MeOH and cooled to -20 °C. Again the precipitate was filtered off and washed with cold MeOH. The crude product was purified by reversed-phase flash chromatography and recrystallization from MeOH/water (10:1).

Yield: 295 mg, 0.58 mmol, 39 %, white solid; Purity: >99 %; dp 224 °C;  $^1\text{H}$  NMR (700 MHz,  $\text{DMSO-d}_6$ ):  $\delta$  = 12.55 (s, 2H), 11.84 (s, 1H), 9.16 (t,  $J$  = 6.2 Hz, 1H), 8.46 (s, 1H), 7.93 (d,  $J$  = 7.9 Hz, 2H), 7.44 (d,  $J$  = 7.6 Hz, 2H), 7.25-7.20 (m, 1H), 6.83-6.79 (m, 3H), 4.99 (s, 2H), 4.27 (d,  $J$  = 6.2 Hz, 2H), 3.95 (t,  $J$  = 6.2 Hz, 2H), 2.39 (t,  $J$  = 7.8 Hz, 2H), 1.93 (ps. quin,  $J$  = 6.8 Hz, 2H);  $^{13}\text{C}$  NMR (176 MHz,  $\text{DMSO-d}_6$ ):  $\delta$  = 174.06, 166.99, 161.60, 158.56, 152.21, 151.65, 149.90, 141.10, 140.30, 130.22, 129.70 (2C), 129.43, 127.59 (2C), 119.48, 113.59, 112.77, 95.64, 86.94, 77.52, 66.48, 50.92, 42.30, 30.16, 24.32; IR (ATR):  $\tilde{\nu}$  = 3334, 3021, 2900, 2837, 2227, 1741, 1706, 1673, 1644, 1461, 1291, 1272, 1253, 1152, 1042, 868, 747  $\text{cm}^{-1}$ ; HPLC:  $t_R$  10.98 min; ESI-TOF-HRMS:  $m/z$  506.1549  $[\text{M} + \text{H}]^+$ , calculated for  $\text{C}_{26}\text{H}_{23}\text{N}_3\text{O}_8$ : 505.1485, found: 505.1475; Anal. calculated for  $\text{C}_{26}\text{H}_{23}\text{N}_3\text{O}_8$  [%]: C 61.78, H 4.59, N 8.31, found [%]: C 61.55, H 4.54, N 8.24.

**3-(1-Benzyl-2,4-dioxo-1,2,3,4-tetrahydropyrimidin-5-yl)-N-[(2-fluorophenyl)methyl]prop-2-ynamide (9a)**

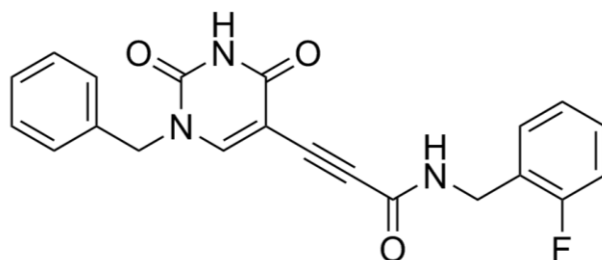

This compound was synthesized out of **5a** and **8b** following the general procedure for Sonogashira cross-coupling.

Yield: 70.0 mg, 0.19 mmol, 61 %, colorless needles; Purity: >99 %; dp 144 °C; <sup>1</sup>H NMR (300 MHz, DMSO-d<sub>6</sub>): δ = 11.81 (s, 1H), 9.17 (t, *J* = 5.9 Hz, 1H), 8.42 (s, 1H), 7.43-7.27 (m, 7H), 7.21-7.12 (m, 2H), 4.92 (s, 2H), 4.35 (d, *J* = 5.9 Hz, 2H); <sup>13</sup>C NMR (75 MHz, DMSO-d<sub>6</sub>): δ = 161.51, 159.99 (d, *J* = 245.1 Hz), 152.26, 151.57, 149.87, 136.17, 129.69 (d, *J* = 4.2 Hz), 129.13 (d, *J* = 8.1 Hz), 128.67 (2C), 127.86, 127.63 (2C), 125.19 (d, *J* = 14.8 Hz), 124.33 (d, *J* = 3.5 Hz), 115.12 (d, *J* = 21.1 Hz), 95.40, 86.74, 77.63, 51.00, 36.24 (d, *J* = 4.7 Hz); <sup>19</sup>F NMR (282 MHz, DMSO-d<sub>6</sub>): δ = -118.72-118.80 (m); IR (ATR): ν̄ = 3613, 3419, 3041, 2853, 2360, 2216, 1707, 1674, 1634, 1293, 870, 752, 697 cm<sup>-1</sup>; HPLC: *t<sub>R</sub>* 12.81 min; ESI-TOF-HRMS: *m/z* 378.1242 [M + H]<sup>+</sup>, calculated for C<sub>21</sub>H<sub>16</sub>FN<sub>3</sub>O<sub>3</sub>: 377.1176, found: 377.1168; Anal. calculated for C<sub>21</sub>H<sub>16</sub>FN<sub>3</sub>O<sub>3</sub> [%]: C 66.84, H 4.27, N 11.13, found [%]: C 66.67, H 4.05, N 11.02.

**3-(1-Benzyl-2,4-dioxo-1,2,3,4-tetrahydropyrimidin-5-yl)-N-[(3-fluorophenyl)methyl]prop-2-ynamide (9b)**

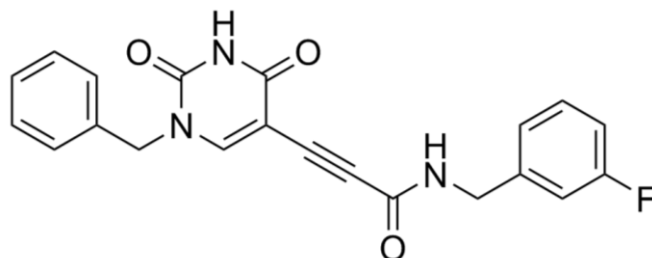

This compound was synthesized out of **5a** and **8c** following the general procedure for Sonogashira cross-coupling.

Yield: 79.3 mg, 0.21 mmol, 69 %, colorless needles; Purity: >99 %; dp 185 °C; <sup>1</sup>H NMR (300 MHz, DMSO-d<sub>6</sub>): δ = 11.82 (s, 1H), 9.22 (t, *J* = 6.1 Hz, 1H), 8.44 (s, 1H), 7.41-7.31 (m, 6H),

7.11-7.05 (m, 3H), 4.92 (s, 2H), 4.32 (d,  $J = 6.1$  Hz, 2H);  $^{13}\text{C}$  NMR (75 MHz, DMSO- $d_6$ ):  $\delta = 161.96$  (d,  $J = 243.4$  Hz), 161.55, 152.32, 151.63, 149.89, 141.70 (d,  $J = 7.2$  Hz), 136.18, 130.32 (d,  $J = 8.4$  Hz), 128.69 (2C), 127.88, 127.65 (2C), 123.29 (d,  $J = 2.7$  Hz), 113.96 (d,  $J = 21.7$  Hz), 113.72 (d,  $J = 21.0$  Hz), 95.38, 86.77, 77.73, 51.03, 41.88;  $^{19}\text{F}$  NMR (282 MHz, DMSO- $d_6$ ):  $\delta = -113.42$ -113.51 (m); IR (ATR):  $\tilde{\nu} = 3338, 3033, 2924, 2850, 2360, 2226, 1722, 1669, 1632, 1541, 1284, 867, 698$   $\text{cm}^{-1}$ ; HPLC:  $t_R$  12.87 min; ESI-TOF-HRMS:  $m/z$  378.1242  $[\text{M} + \text{H}]^+$ , calculated for  $\text{C}_{21}\text{H}_{16}\text{FN}_3\text{O}_3$ : 377.1176, found: 377.1168.

**3-(1-Benzyl-2,4-dioxo-1,2,3,4-tetrahydropyrimidin-5-yl)-N-[(4-fluorophenyl)methyl]prop-2-ynamide (9c)**

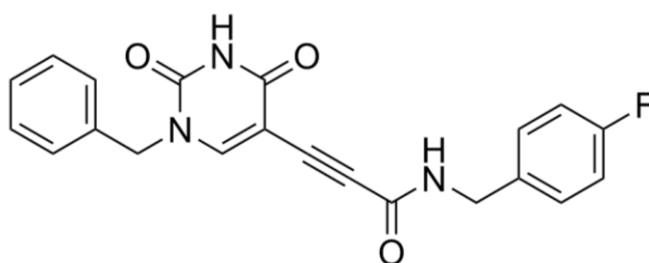

This compound was synthesized out of **5a** and **8d** following the general procedure for Sonogashira cross-coupling.

Yield: 79.6 mg, 0.21 mmol, 69 %, colorless needles; Purity: >99 %; dp 195 °C;  $^1\text{H}$  NMR (300 MHz, DMSO- $d_6$ ):  $\delta = 11.79$  (s, 1H), 9.16 (t,  $J = 6.1$  Hz, 1H), 8.41 (s, 1H), 7.41-7.26 (m, 7H), 7.19-7.10 (m,  $J = 9.0$  Hz, 2H), 4.92 (s, 2H), 4.28 (d,  $J = 6.1$  Hz, 2H);  $^{13}\text{C}$  NMR (75 MHz, DMSO- $d_6$ ):  $\delta = 161.58, 161.25$  (d,  $J = 242.4$  Hz), 152.24, 151.59, 149.91, 136.20, 134.95 (d,  $J = 3.0$  Hz), 129.39 (d,  $J = 8.2$  Hz), 128.72 (2C), 127.91, 127.66 (2C), 115.08 (d,  $J = 21.3$  Hz), 95.43, 86.86, 77.59, 51.04, 41.69;  $^{19}\text{F}$  NMR (282 MHz, DMSO- $d_6$ ):  $\delta = -115.91$  (tt,  $J = 9.1$  Hz,  $J = 5.5$  Hz); IR (ATR):  $\tilde{\nu} = 3319, 2989, 2849, 2361, 2326, 2228, 1719, 1670, 1630, 1542, 1278, 1227, 817, 695$   $\text{cm}^{-1}$ ; HPLC:  $t_R$  12.87 min; ESI-TOF-HRMS:  $m/z$  378.1242  $[\text{M} + \text{H}]^+$ , calculated for  $\text{C}_{21}\text{H}_{16}\text{FN}_3\text{O}_3$ : 377.1176, found: 377.1168; Anal. calculated for  $\text{C}_{21}\text{H}_{16}\text{FN}_3\text{O}_3$  [%]: C 66.84, H 4.27, N 11.13, found [%]: C 66.59, H 4.05, N 11.17.



## **Biological Assays**

### **Enzo Life Sciences drug discovery kits**

The following assay kits were purchased from Enzo Life Sciences (<http://www.enzolifesciences.com>) and used to test the synthesized inhibitors for their inhibitory activity against the catalytic domains of MMP-1, MMP-2, MMP-3, MMP-7, MMP-8, MMP-9, MMP-12, MMP-13 and MMP-14: BML-AK404-0001, MMP-1 colorimetric drug discovery kit, enzyme concentration of 15.3 U per well; BML-AK408-0001, MMP-2 colorimetric drug discovery kit, enzyme concentration of 1.16 U per well; BML-AK400-0001, MMP-3 colorimetric drug discovery kit, enzyme concentration of 2 U per well; BML-AK406-0001, MMP-7 colorimetric drug discovery kit, enzyme concentration of 1.28 U per well; BML-AK414-0001, MMP-8 colorimetric drug discovery kit, enzyme concentration of 1.84 U per well; BML-AK410-0001, MMP-9 colorimetric drug discovery kit, enzyme concentration of 0.9 U per well; BML-AK402-0001, MMP-12 colorimetric drug discovery kit, enzyme concentration of 0.7 U per well; BML-AK412-0001, MMP-13 colorimetric drug discovery kit, enzyme concentration of 1.38 U per well; BML-AK416-0001, MMP-14 colorimetric drug discovery kit, enzyme concentration of 2.4 U per well.

All test compounds were dissolved in DMSO. The final amount of DMSO in the reaction was 5 % (v/v). Single dose measurements were performed at a compound concentration of 6.5  $\mu$ M. For IC<sub>50</sub> determinations a serial dilution consisting of seven concentrations was measured. To get 100 % activity of the enzyme, control measurements containing buffer, enzyme, substrate and 5 % DMSO were measured.

### **Reaction Biology Corp. – Protease Assays**

The fluorometric assays were carried out by Reaction Biology Corp. (<http://www.reactionbiology.com>) using the catalytic domain of the proteases and the FRET peptide 5-FAM/QXLTM as substrate. Enzyme concentration in the assays were as follows: MMP-1, 1.48 nM; MMP-2, 3.78 nM; MMP-3, 7.01 nM; MMP-7, 1.44 nM; MMP-8, 1.73 nM; MMP-9, 1.60 nM; MMP-12, 0.37 nM; MMP-13, 0.66 nM; MMP-14, 4.39 nM. Buffer: 50 mM HEPES (pH 7.5), 10 mM CaCl<sub>2</sub>, 0.01 % Brij-35, add 0.1 mg/mL BSA and 1 % DMSO before use.

Compounds tested by Reaction Biology Corp. were dissolved in DMSO. The final amount of DMSO in the reaction was 1.1 % (v/v). Single dose measurements were performed at a compound concentration of 10  $\mu$ M. For IC<sub>50</sub> determinations a serial dilution consisting of ten concentrations was measured.

## IC<sub>50</sub> measurements:

### ***N*-Benzyl-3-(1-benzyl-2,4-dioxo-1,2,3,4-tetrahydropyrimidin-5-yl)prop-2-ynamide (2)**

The scaffold **2** was measured in-house using the colorimetric drug discovery kit from Enzo Life Sciences due to its bad solubility: No reliable measurements for  $c(2) > 20 \mu\text{M}$ .

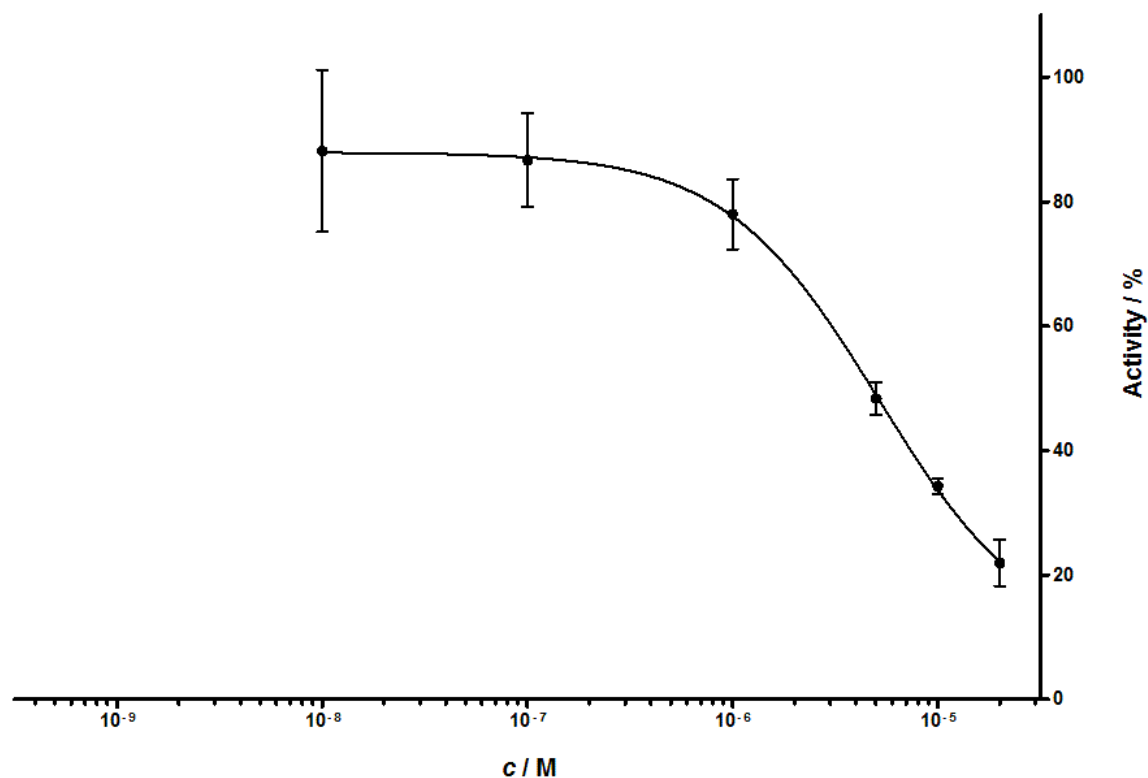

Best-fit values (Sigmoidal dose-response):

|                     |                 |
|---------------------|-----------------|
| Bottom              | 8.724           |
| Top                 | 87.94           |
| LogIC <sub>50</sub> | -5.290 ± 0.1652 |
| Hill Slope          | -1.165          |

|                        |                                                               |
|------------------------|---------------------------------------------------------------|
| <b>IC<sub>50</sub></b> | <b>5.126E-06 M</b><br><b>2.266E-06 – 1.159E-05 M (95% CI)</b> |
|------------------------|---------------------------------------------------------------|

|          |        |
|----------|--------|
| R square | 0.9558 |
|----------|--------|

**4-[[5-(2-[[[3-methoxyphenyl)methyl]carbamoyl]eth-1-yn-1-yl)-2,4-dioxo-1,2,3,4-tetrahydropyrimidin-1-yl]methyl]benzoic acid (3)**

Measured by Reaction Biology Corp.

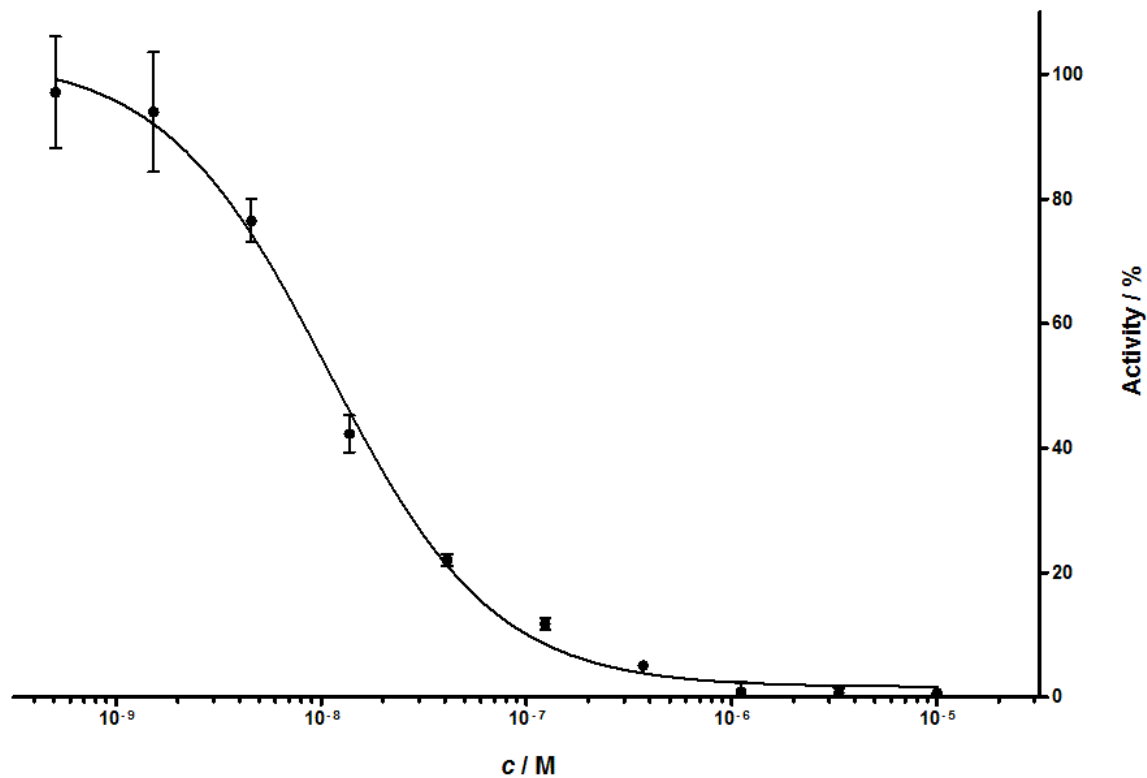

Best-fit values (Sigmoidal dose-response):

|            |                  |
|------------|------------------|
| Bottom     | 1.677            |
| Top        | 102.8            |
| LogIC50    | -7.963 ± 0.04705 |
| Hill Slope | -1.080           |

|             |                                                               |
|-------------|---------------------------------------------------------------|
| <b>IC50</b> | <b>1.090E-08 M</b><br><b>8.723E-09 – 1.362E-08 M (95% CI)</b> |
|-------------|---------------------------------------------------------------|

|          |        |
|----------|--------|
| R square | 0.9877 |
|----------|--------|

**4-({5-[2-({[3-(3-Carboxypoxy)phenyl]methyl}carbamoyl)eth-1-yn-1-yl]-2,4-dioxo-1,2,3,4-tetrahydropyrimidin-1-yl}methyl)benzoic acid (4)**

Measured by Reaction Biology Corp.

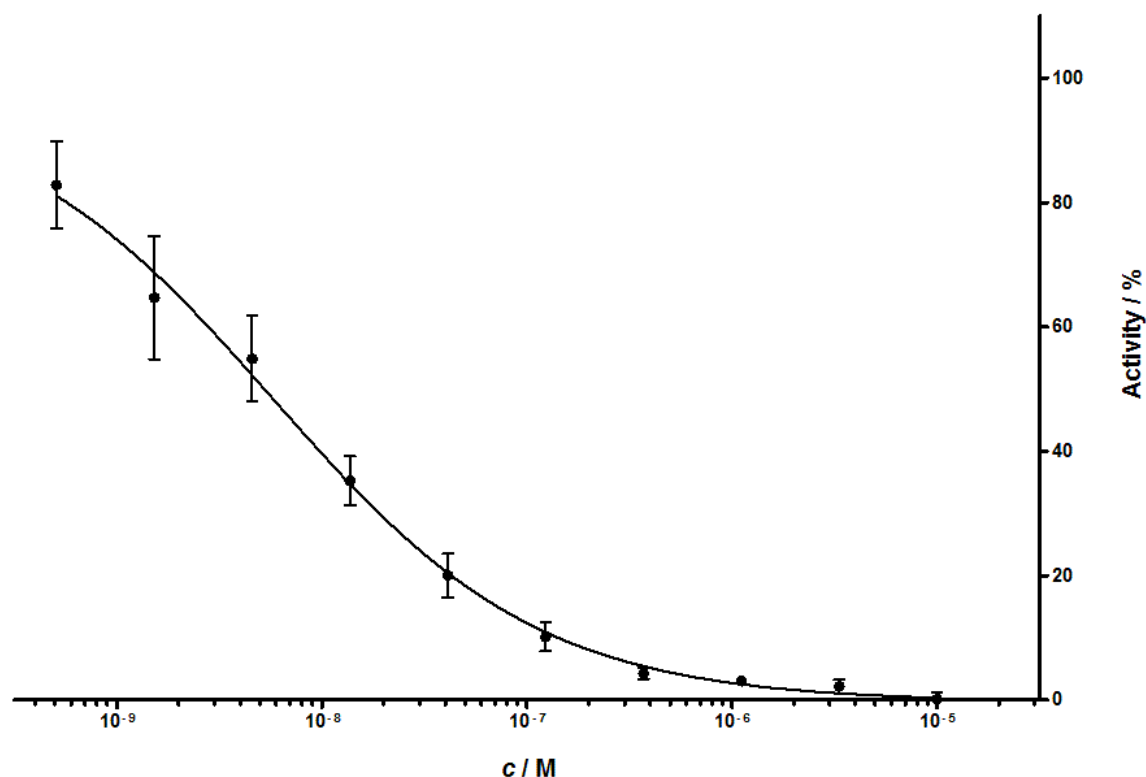

Best-fit values (Sigmoidal dose-response):

Bottom -0.2977  
 Top 97.20  
 LogIC50 -8.238 ± 0.1530  
 Hill Slope -0.6662

**IC50 5.775E-09 M**  
**2.799E-09 – 1.191E-08 M (95% CI)**

R square 0.9778

**Profiling:**

| Anti-Target | Activity         |                  |                  |
|-------------|------------------|------------------|------------------|
|             | 2 <sup>[a]</sup> | 3 <sup>[a]</sup> | 4 <sup>[b]</sup> |
| MMP 1       | 93 ± 5           | 116 ± 29         | 103 ± 1          |
| MMP 2       | 101 ± 4          | 76 ± 21          | 96 ± 2           |
| MMP 3       | 96 ± 4           | 85 ± 18          | 102 ± 1          |
| MMP 7       | 102 ± 3          | 107 ± 23         | 104 ± 2          |
| MMP 8       | 96 ± 7           | 108 ± 22         | 113 ± 2          |
| MMP 9       | 104 ± 5          | 96 ± 11          | 107 ± 3          |
| MMP 12      | 100 ± 5          | 106 ± 29         | 113 ± 4          |
| MMP 14      | 95 ± 3           | 109 ± 28         | 101 ± 1          |

Remaining activity of anti-targets in % ± SD; [a] Triplicates measured in-house at c(inhibitor) = 20 µM; [b] Triplicates measured by Reaction Biology Corp. at c(inhibitor) = 10 µM.

# Analytical Data

## NMR spectra

### 1-Benzyl-5-iodo-1,2,3,4-tetrahydropyrimidine-2,4-dione (5a)

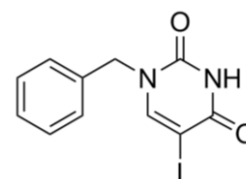

| Parameter         | Value       |
|-------------------|-------------|
| 1 Title           | Compound 5a |
| 2 Solvent         | DMSO        |
| 3 Experiment      | 1D          |
| 4 Number of Scans | 32          |

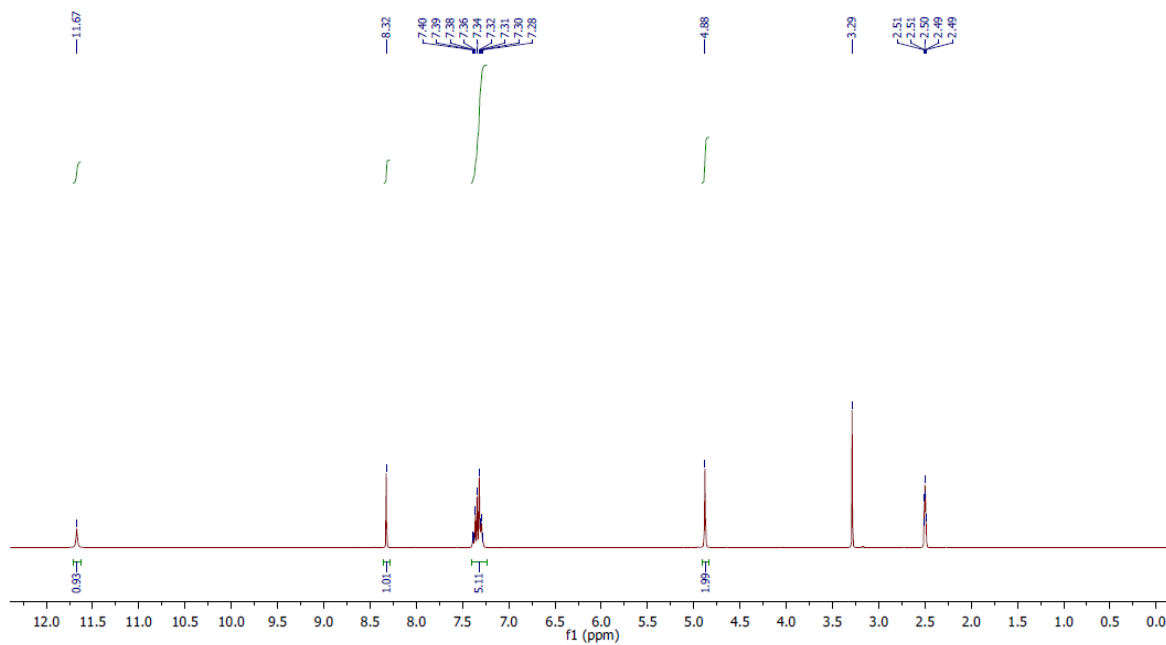

| Parameter         | Value       |
|-------------------|-------------|
| 1 Title           | Compound 5a |
| 2 Solvent         | DMSO        |
| 3 Experiment      | 13C         |
| 4 Number of Scans | 2048        |

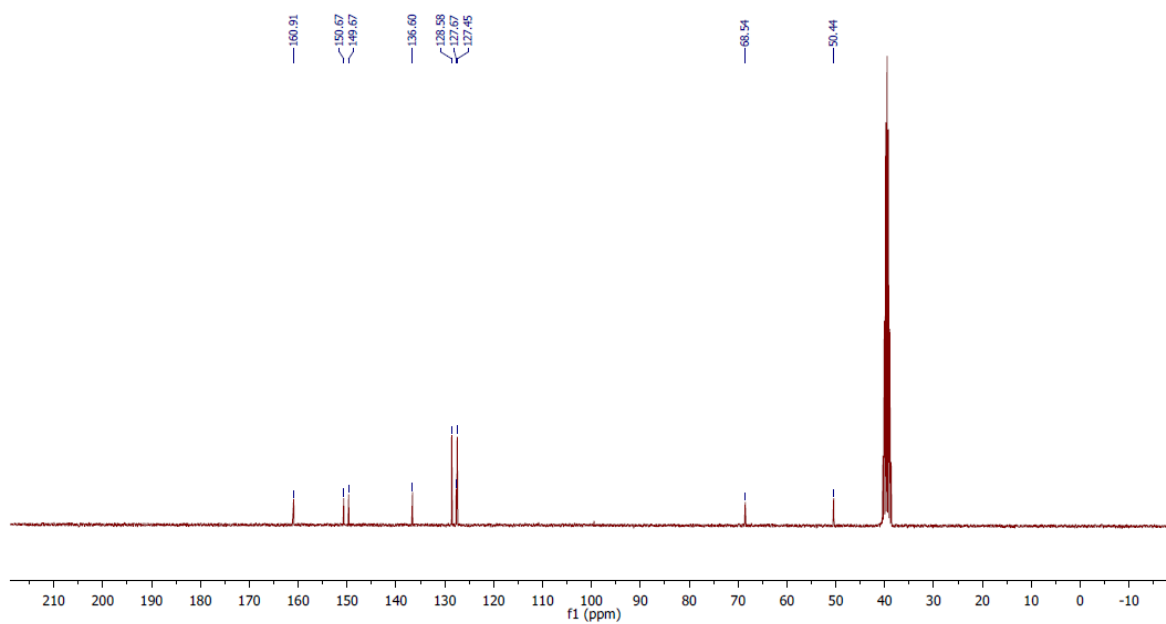

| Parameter         | Value       |
|-------------------|-------------|
| 1 Title           | Compound 5a |
| 2 Solvent         | DMSO        |
| 3 Experiment      | DEPT-135    |
| 4 Number of Scans | 512         |

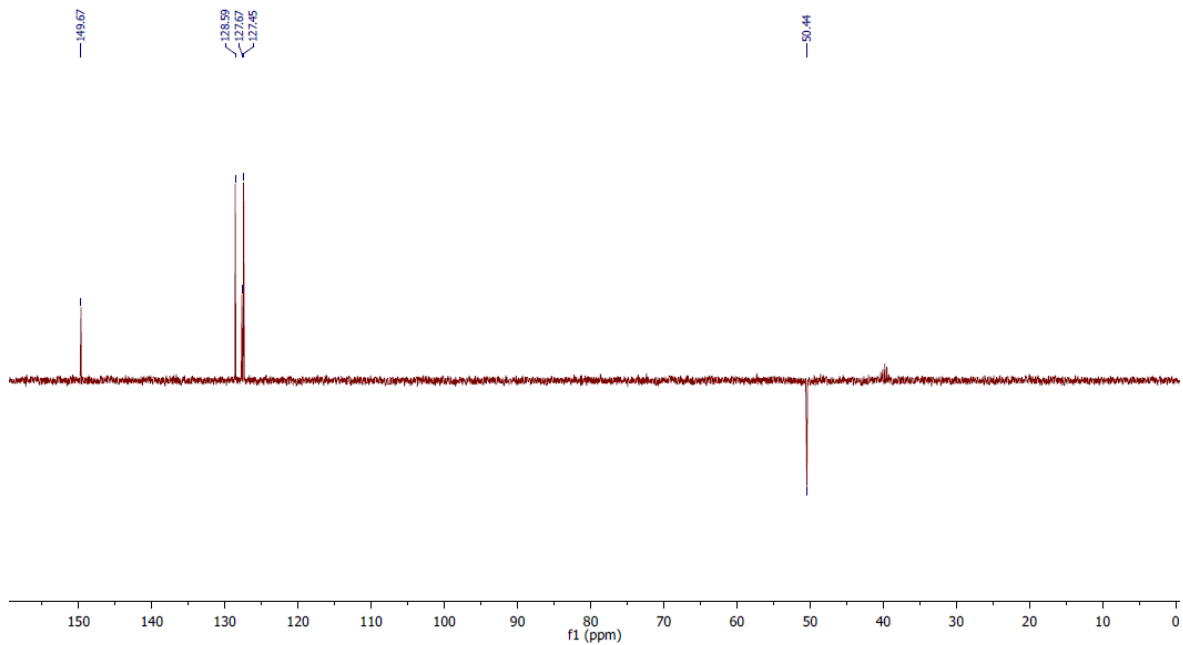

| Parameter         | Value       |
|-------------------|-------------|
| 1 Title           | Compound 5a |
| 2 Solvent         | DMSO        |
| 3 Experiment      | DEPT-90     |
| 4 Number of Scans | 512         |

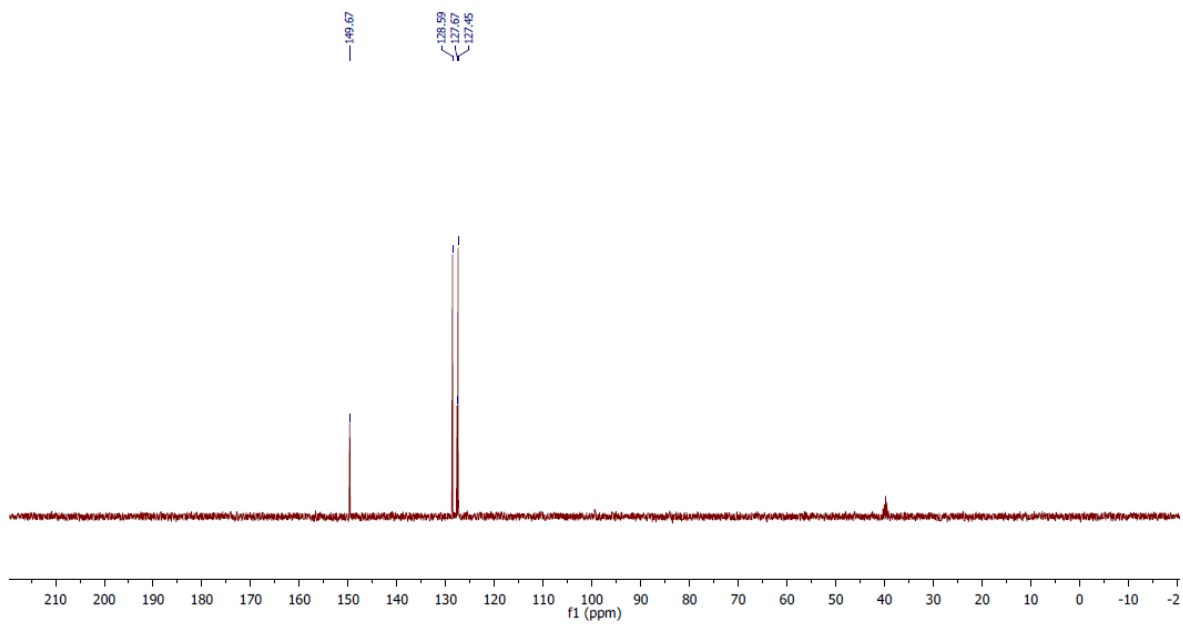



# 4-[(5-Iodo-2,4-dioxo-1,2,3,4-tetrahydropyrimidin-1-yl)methyl]benzoic acid (5b)

| Parameter         | Value       |
|-------------------|-------------|
| 1 Title           | Compound 5b |
| 2 Solvent         | DMSO        |
| 3 Experiment      | 1D          |
| 4 Number of Scans | 32          |

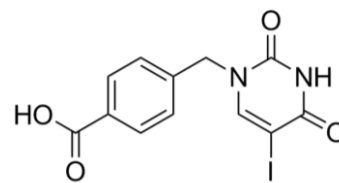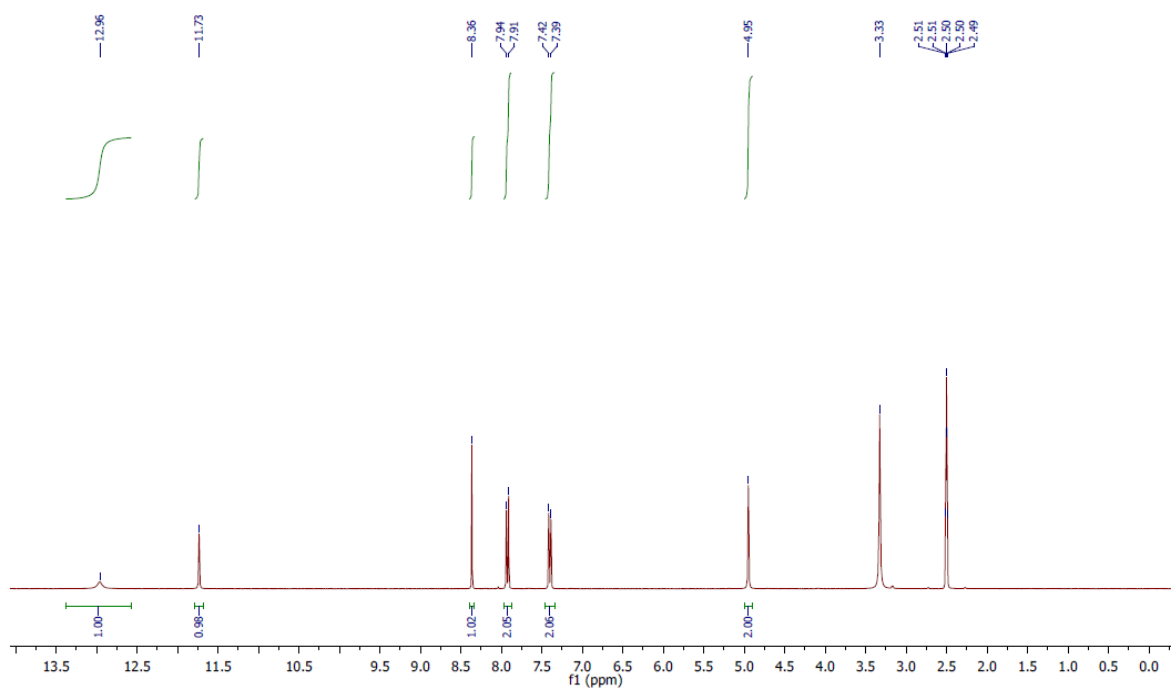

| Parameter         | Value       |
|-------------------|-------------|
| 1 Title           | Compound 5b |
| 2 Solvent         | DMSO        |
| 3 Experiment      | 13C         |
| 4 Number of Scans | 2048        |

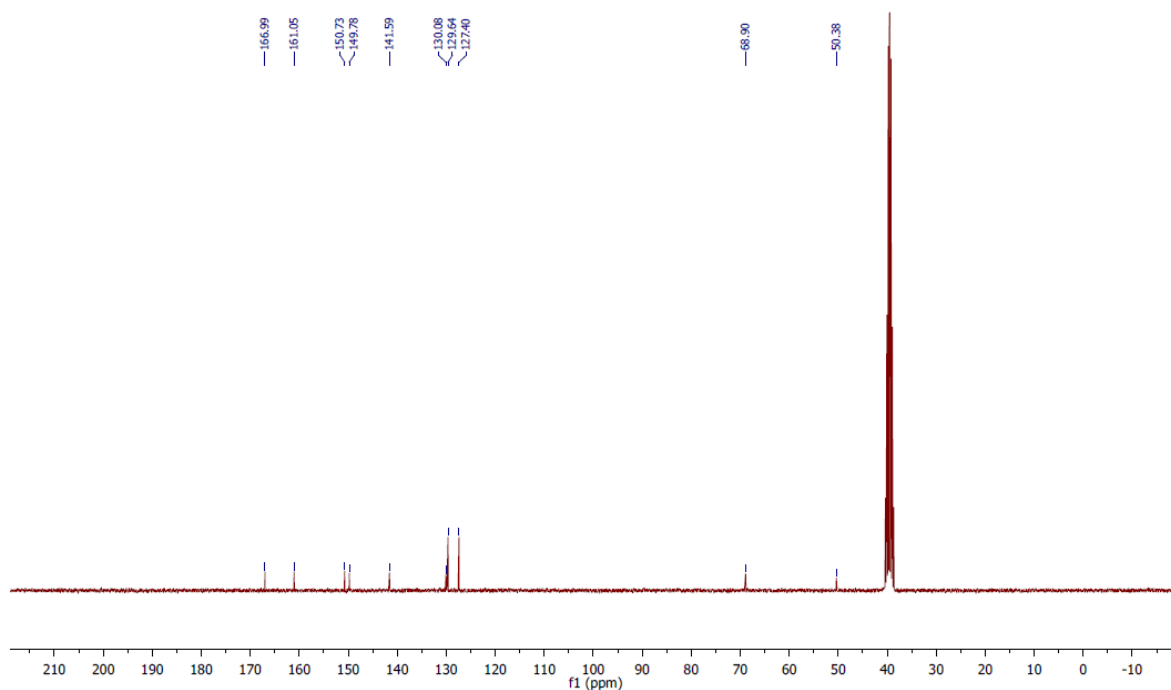

| Parameter         | Value       |
|-------------------|-------------|
| 1 Title           | Compound 5b |
| 2 Solvent         | DMSO        |
| 3 Experiment      | DEPT-135    |
| 4 Number of Scans | 512         |

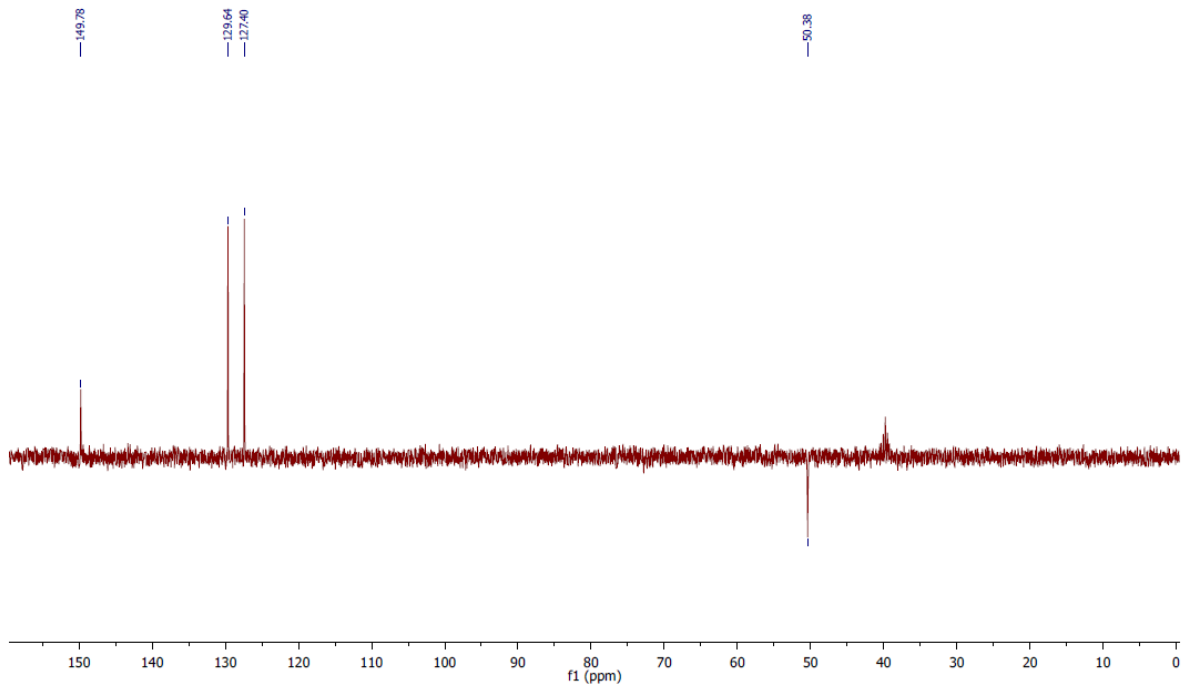

| Parameter         | Value       |
|-------------------|-------------|
| 1 Title           | Compound 5b |
| 2 Solvent         | DMSO        |
| 3 Experiment      | DEPT-90     |
| 4 Number of Scans | 512         |

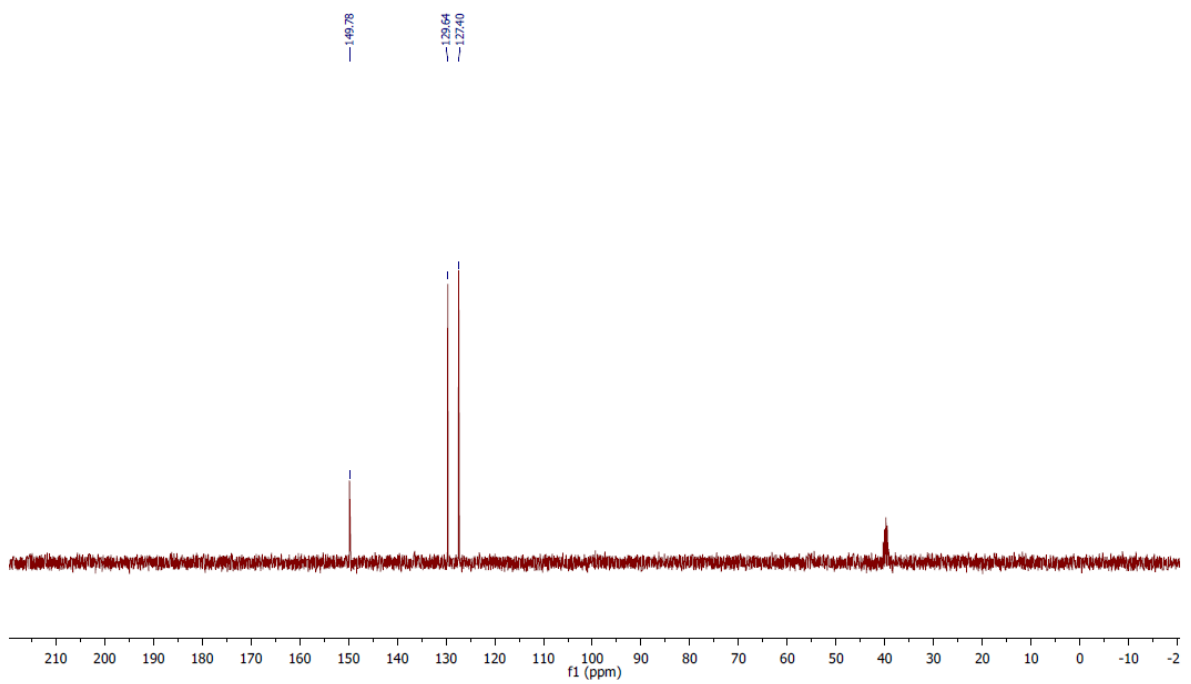

# Methyl 4-(3-cyanophenoxy)butanoate (6)

| Parameter         | Value      |
|-------------------|------------|
| 1 Title           | Compound 6 |
| 2 Solvent         | DMSO       |
| 3 Experiment      | 1D         |
| 4 Number of Scans | 32         |

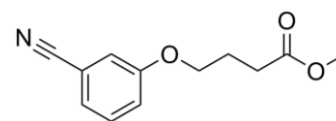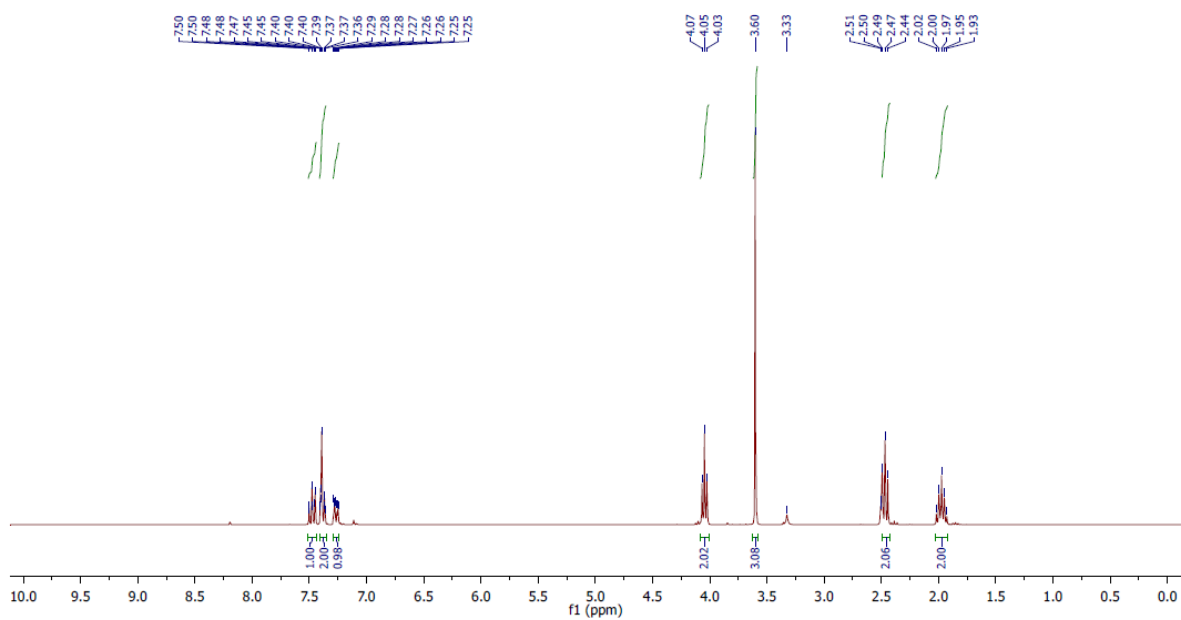

| Parameter         | Value      |
|-------------------|------------|
| 1 Title           | Compound 6 |
| 2 Solvent         | DMSO       |
| 3 Experiment      | 13C        |
| 4 Number of Scans | 1024       |

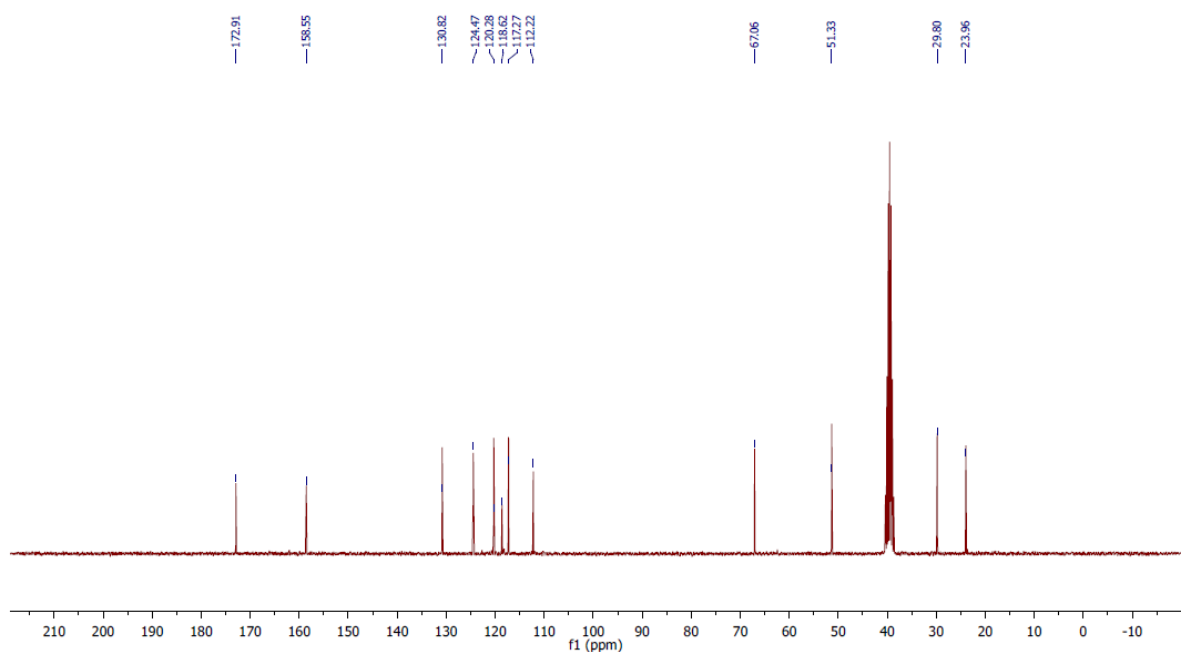

| Parameter         | Value      |
|-------------------|------------|
| 1 Title           | Compound 6 |
| 2 Solvent         | DMSO       |
| 3 Experiment      | DEPT-135   |
| 4 Number of Scans | 256        |

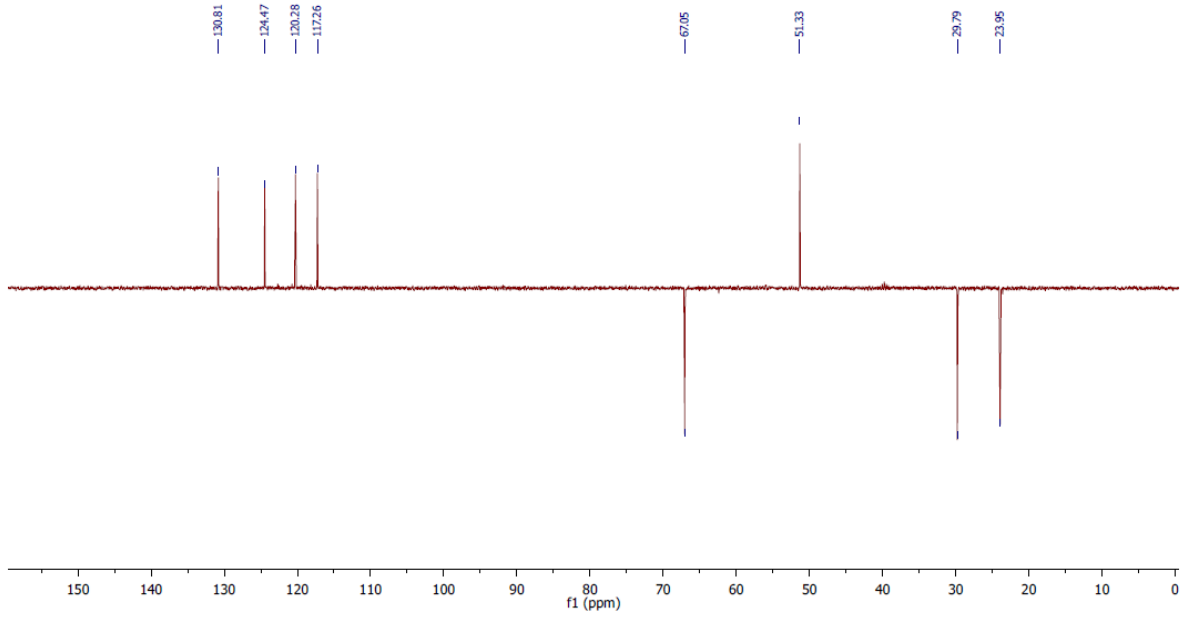

| Parameter         | Value      |
|-------------------|------------|
| 1 Title           | Compound 6 |
| 2 Solvent         | DMSO       |
| 3 Experiment      | DEPT-90    |
| 4 Number of Scans | 256        |

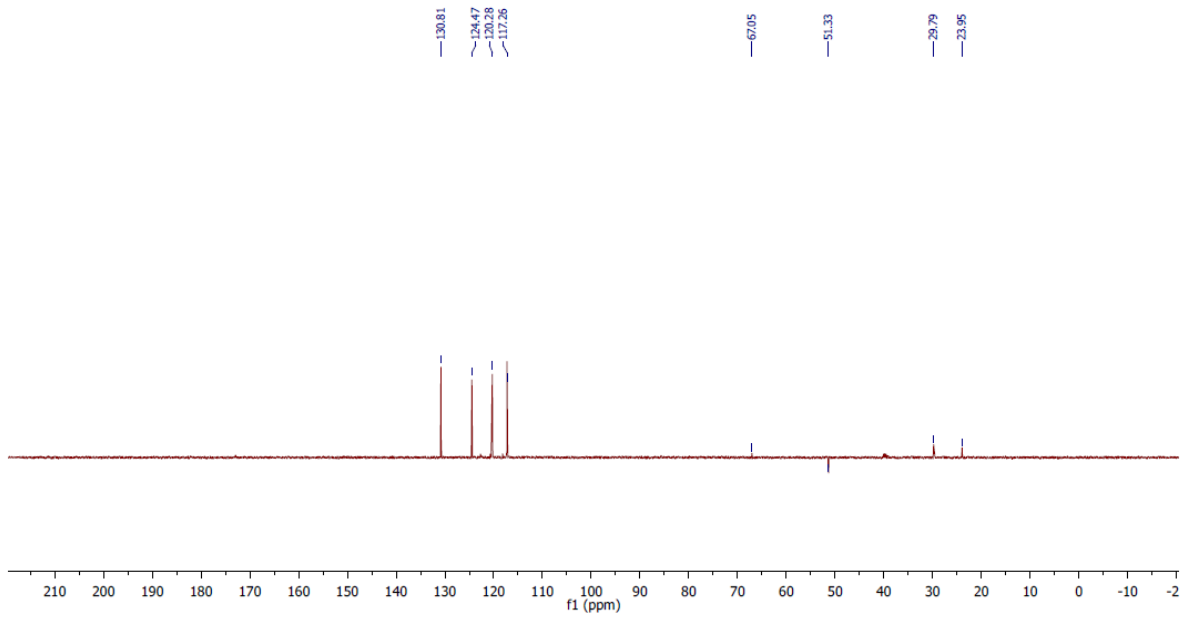

# Methyl 4-[3-(aminomethyl)phenoxy]butanoate (7f)

| Parameter         | Value       |
|-------------------|-------------|
| 1 Title           | Compound 7f |
| 2 Solvent         | DMSO        |
| 3 Experiment      | 1D          |
| 4 Number of Scans | 32          |

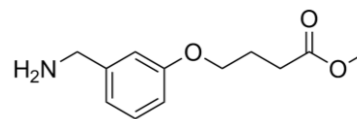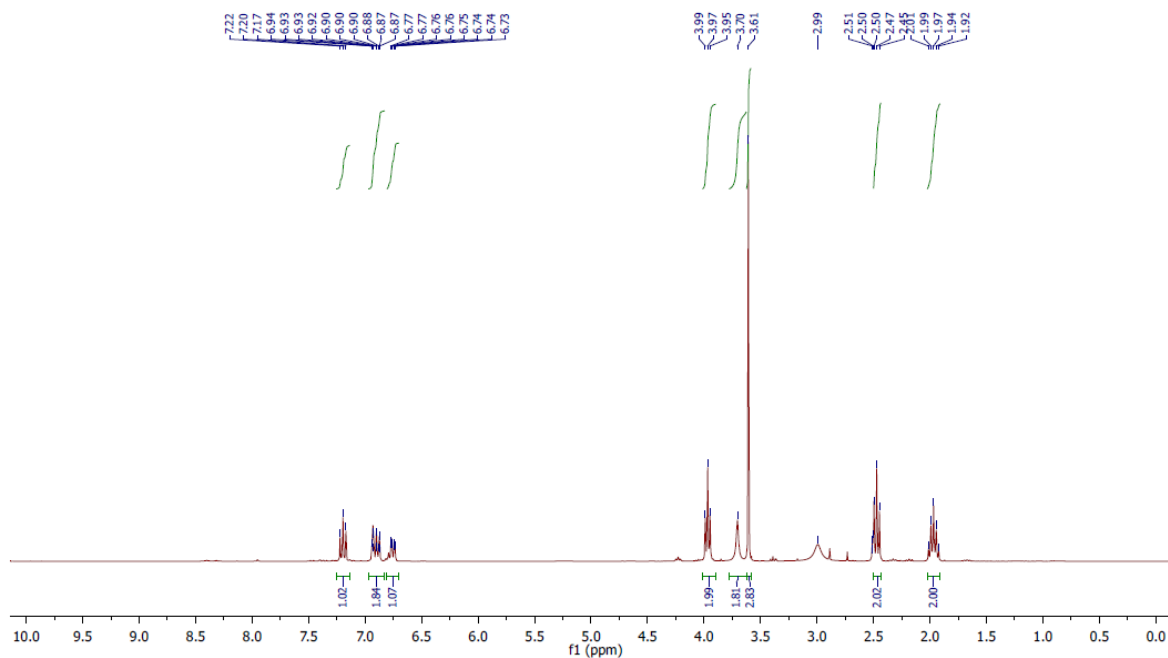

| Parameter         | Value       |
|-------------------|-------------|
| 1 Title           | Compound 7f |
| 2 Solvent         | DMSO        |
| 3 Experiment      | 13C         |
| 4 Number of Scans | 2048        |

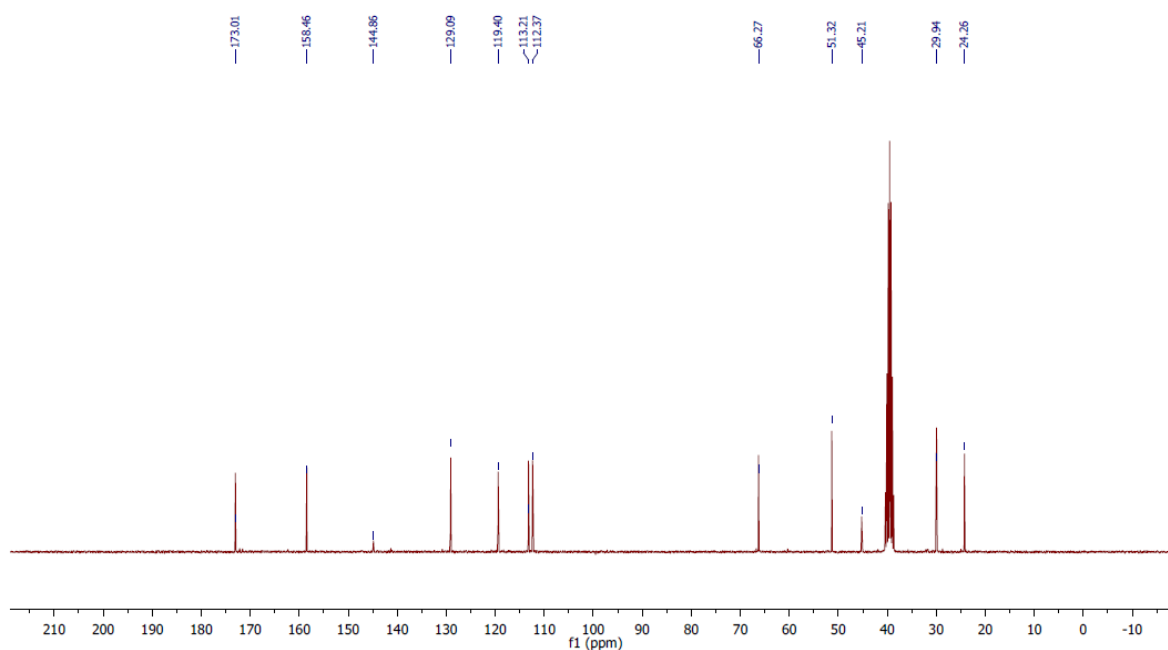

| Parameter         | Value       |
|-------------------|-------------|
| 1 Title           | Compound 7f |
| 2 Solvent         | DMSO        |
| 3 Experiment      | DEPT-135    |
| 4 Number of Scans | 512         |

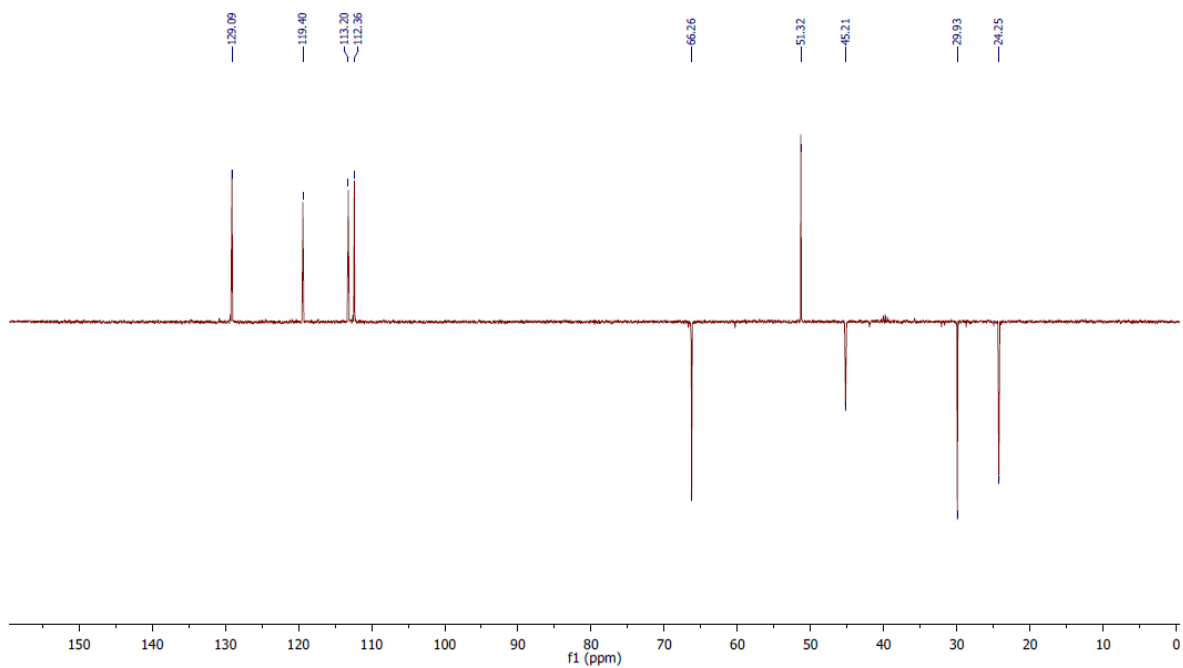

| Parameter         | Value       |
|-------------------|-------------|
| 1 Title           | Compound 7f |
| 2 Solvent         | DMSO        |
| 3 Experiment      | DEPT-90     |
| 4 Number of Scans | 512         |

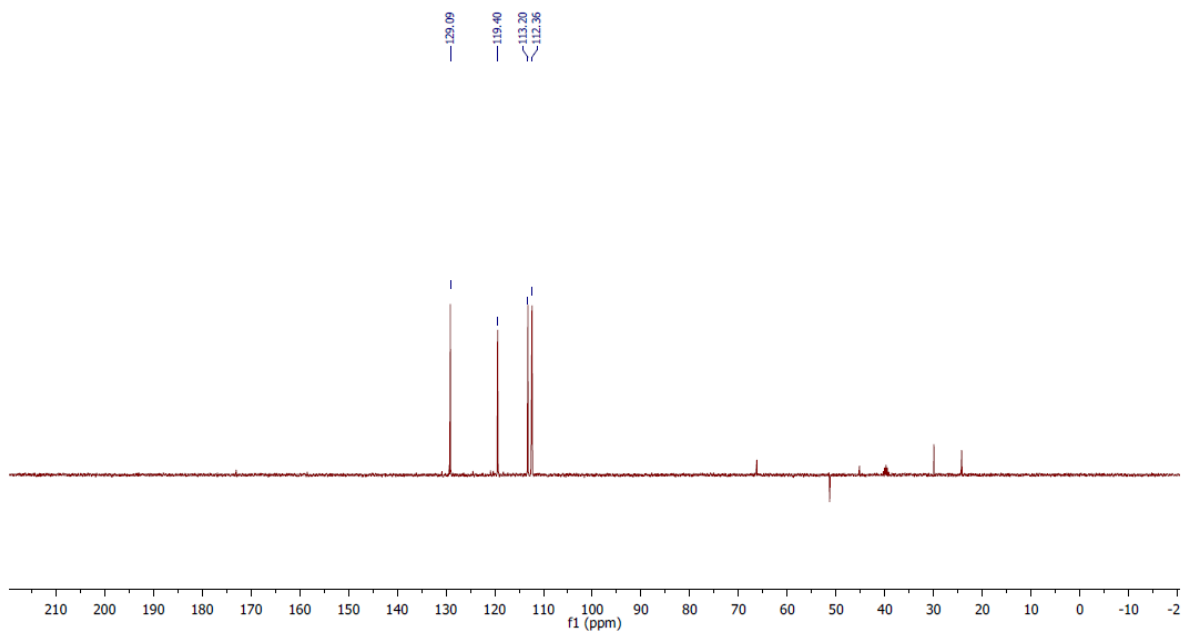

# N-Benzylprop-2-ynamide (8a)

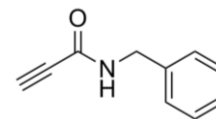

| Parameter         | Value       |
|-------------------|-------------|
| 1 Title           | Compound 8a |
| 2 Solvent         | DMSO        |
| 3 Experiment      | 1D          |
| 4 Number of Scans | 16          |

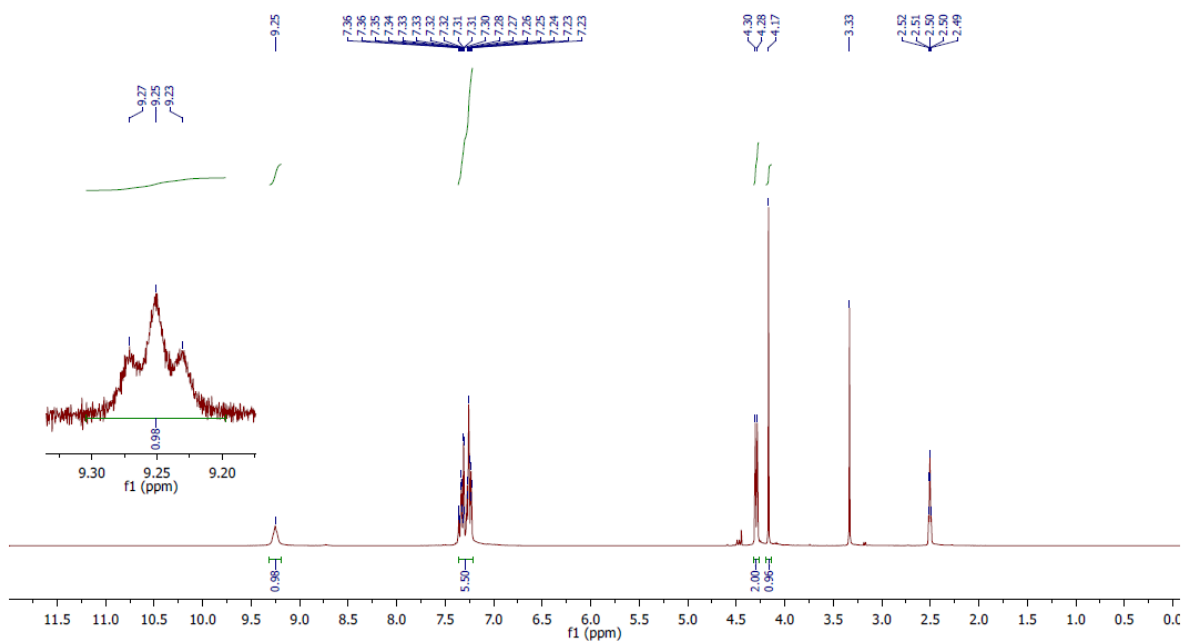

| Parameter         | Value       |
|-------------------|-------------|
| 1 Title           | Compound 8a |
| 2 Solvent         | DMSO        |
| 3 Experiment      | 13C         |
| 4 Number of Scans | 2048        |

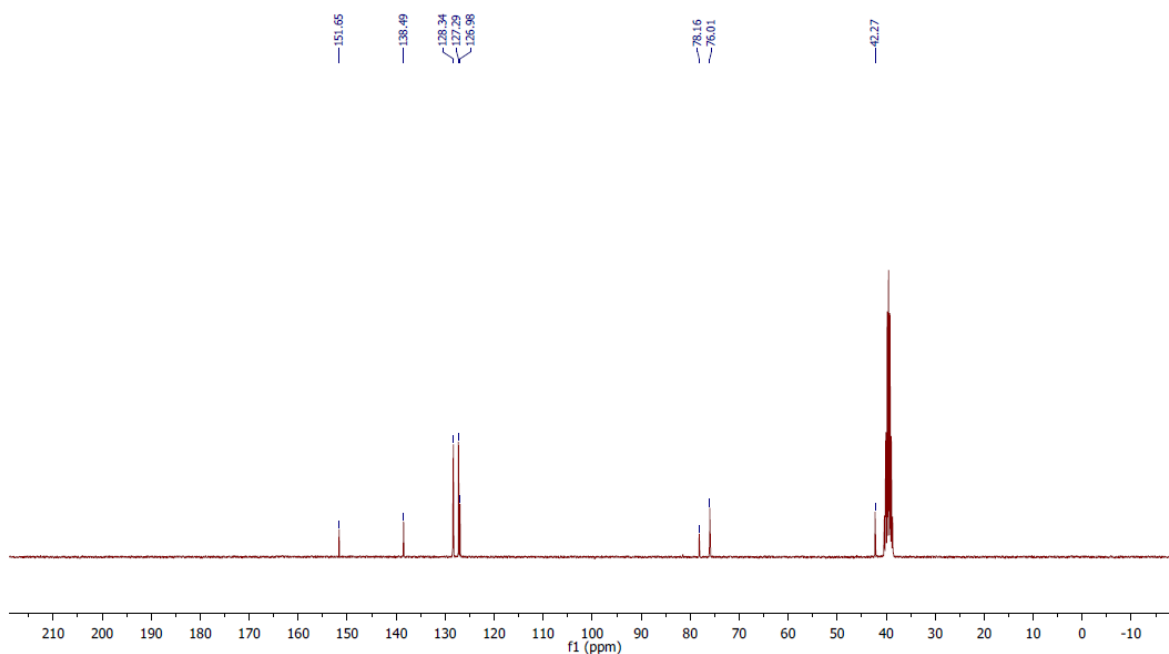

| Parameter         | Value       |
|-------------------|-------------|
| 1 Title           | Compound 8a |
| 2 Solvent         | DMSO        |
| 3 Experiment      | DEPT-135    |
| 4 Number of Scans | 512         |

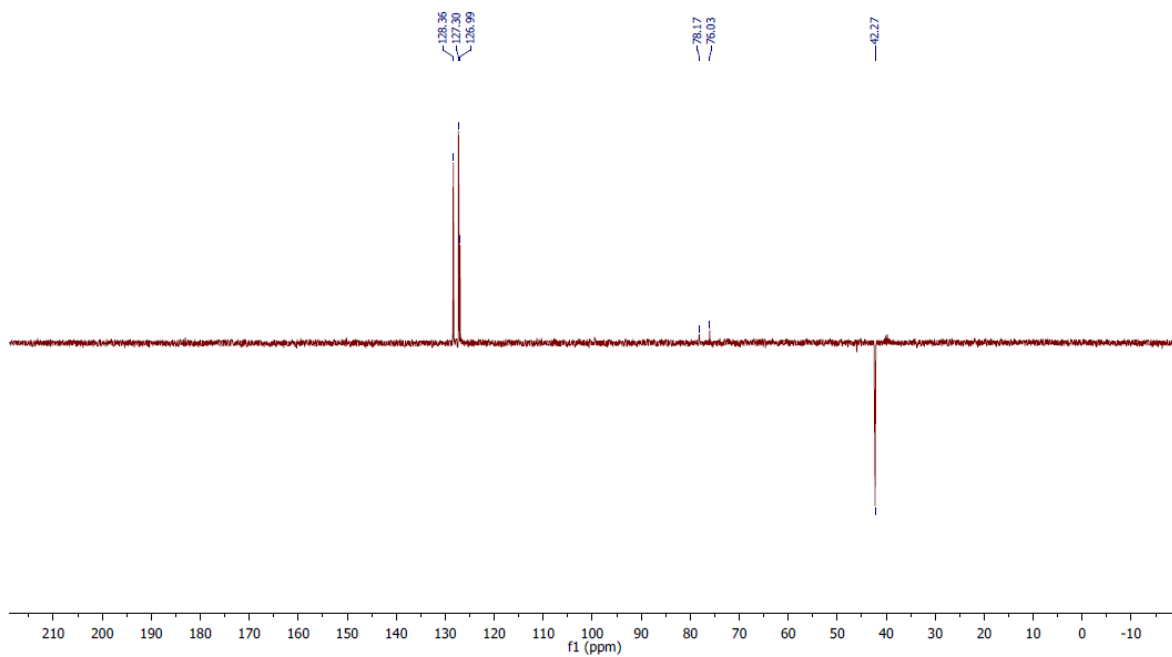

| Parameter         | Value       |
|-------------------|-------------|
| 1 Title           | Compound 8a |
| 2 Solvent         | DMSO        |
| 3 Experiment      | DEPT-90     |
| 4 Number of Scans | 512         |

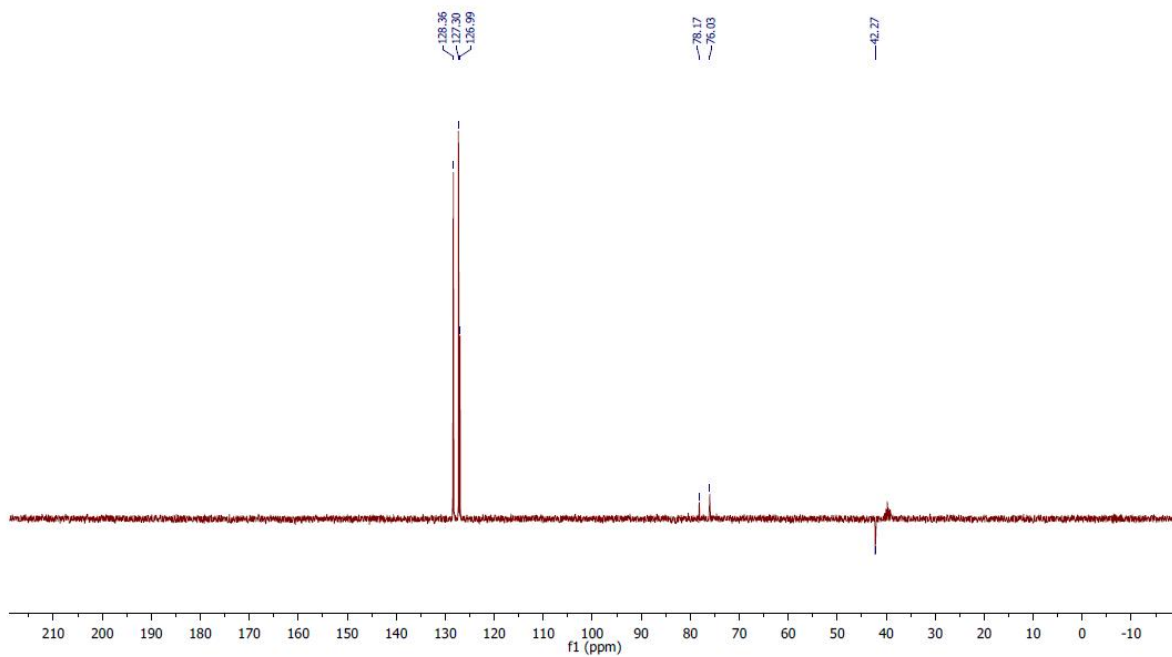



# N-[(2-Fluorophenyl)methyl]prop-2-ynamide (8b)

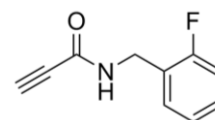

| Parameter         | Value       |
|-------------------|-------------|
| 1 Title           | Compound 8b |
| 2 Solvent         | DMSO        |
| 3 Experiment      | 1D          |
| 4 Number of Scans | 32          |

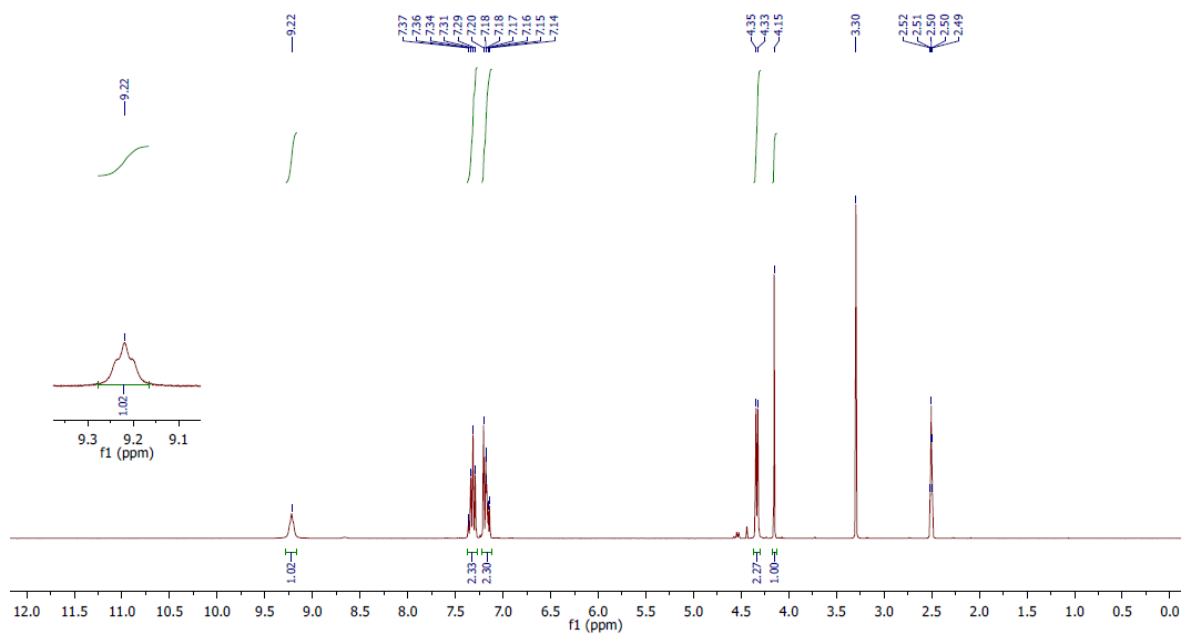

| Parameter         | Value       |
|-------------------|-------------|
| 1 Title           | Compound 8b |
| 2 Solvent         | DMSO        |
| 3 Experiment      | 13C         |
| 4 Number of Scans | 2048        |

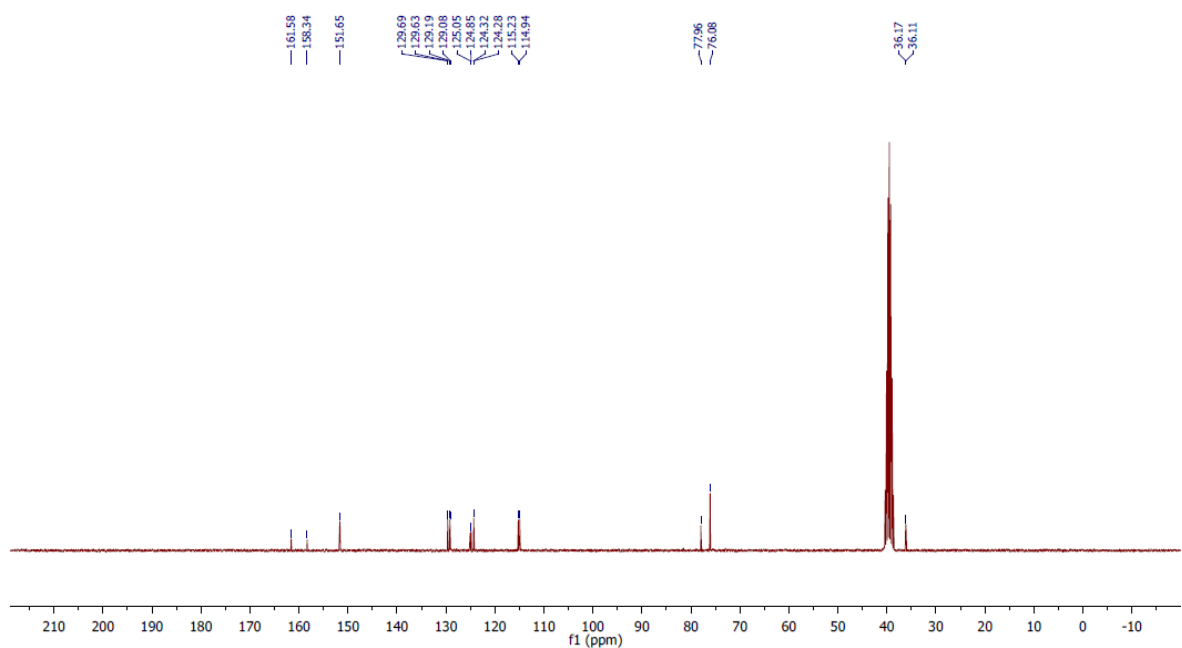

| Parameter         | Value       |
|-------------------|-------------|
| 1 Title           | Compound 8b |
| 2 Solvent         | DMSO        |
| 3 Experiment      | DEPT-135    |
| 4 Number of Scans | 512         |

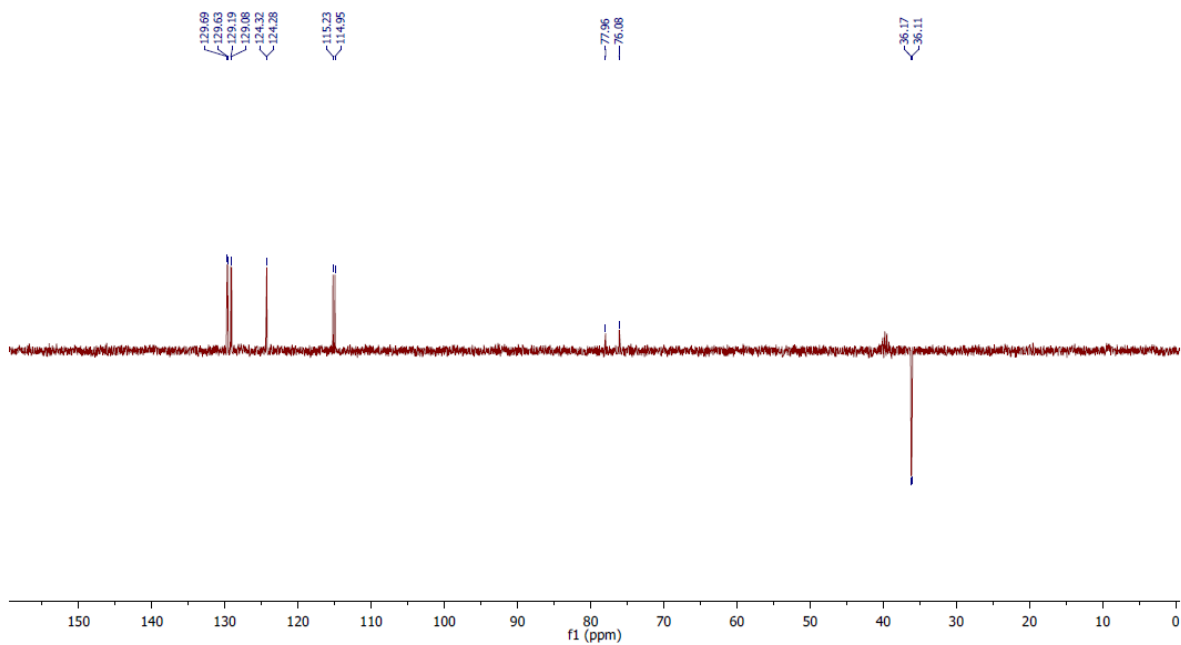

| Parameter         | Value       |
|-------------------|-------------|
| 1 Title           | Compound 8b |
| 2 Solvent         | DMSO        |
| 3 Experiment      | DEPT-90     |
| 4 Number of Scans | 512         |

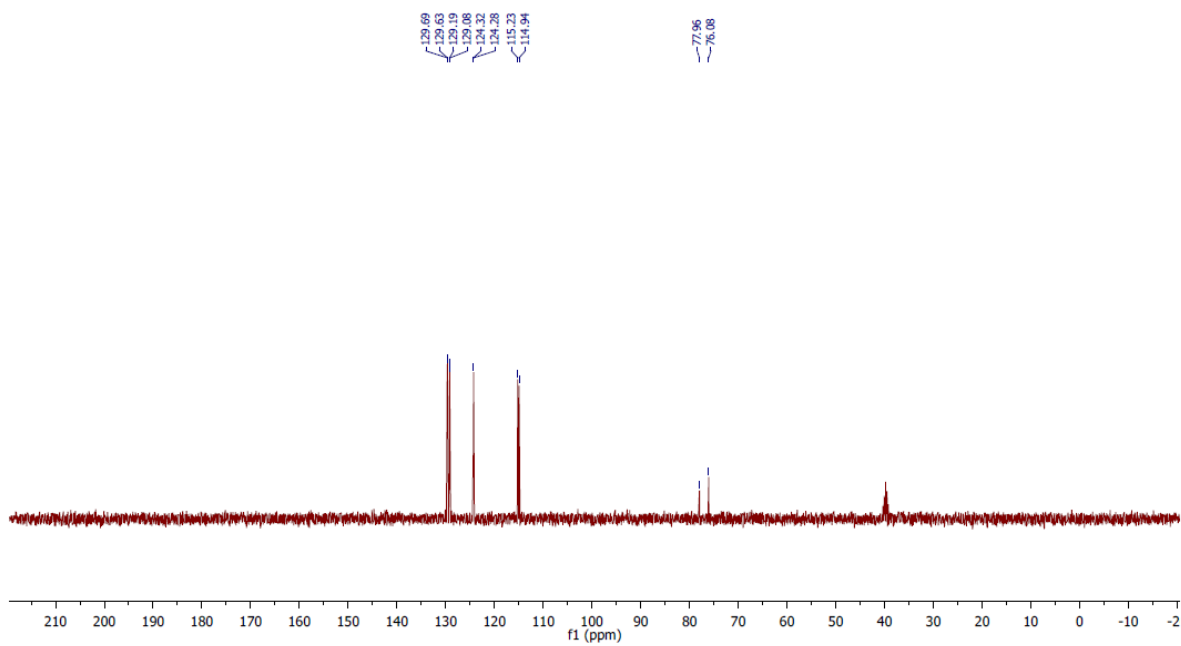

| Parameter         | Value       |
|-------------------|-------------|
| 1 Title           | Compound 8b |
| 2 Solvent         | DMSO        |
| 3 Experiment      | 19F         |
| 4 Number of Scans | 32          |

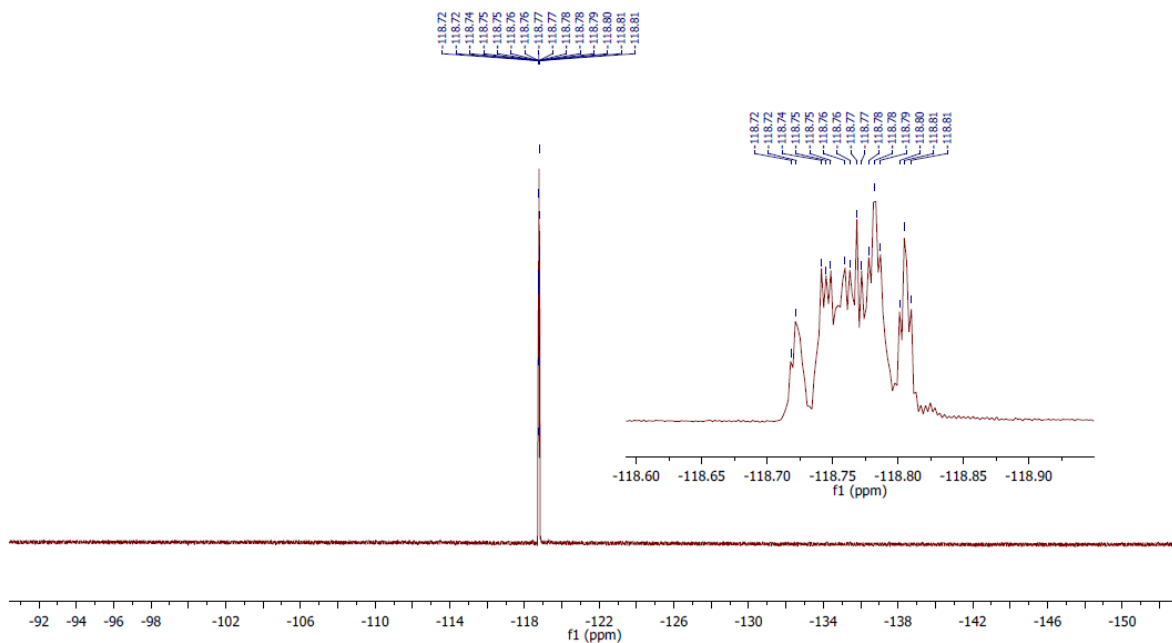

### *N*-[(3-Fluorophenyl)methyl]prop-2-ynamide (8c)

| Parameter         | Value       |
|-------------------|-------------|
| 1 Title           | Compound 8c |
| 2 Solvent         | DMSO        |
| 3 Experiment      | 1D          |
| 4 Number of Scans | 32          |

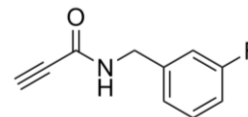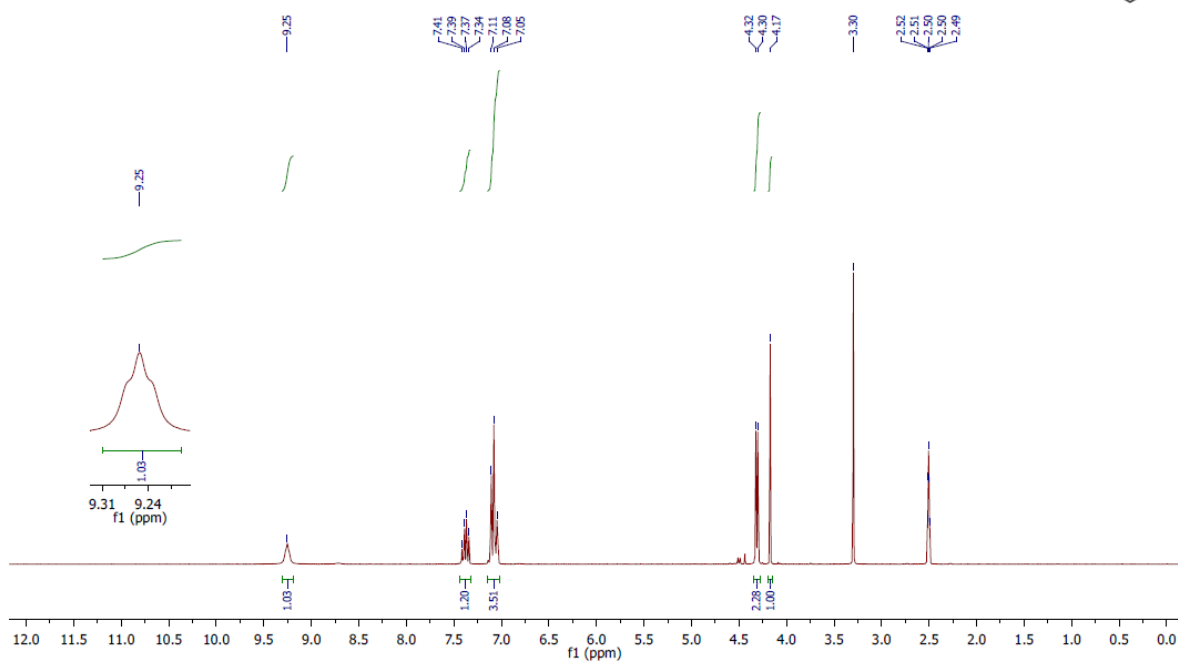

| Parameter         | Value       |
|-------------------|-------------|
| 1 Title           | Compound 8c |
| 2 Solvent         | DMSO        |
| 3 Experiment      | 13C         |
| 4 Number of Scans | 2048        |

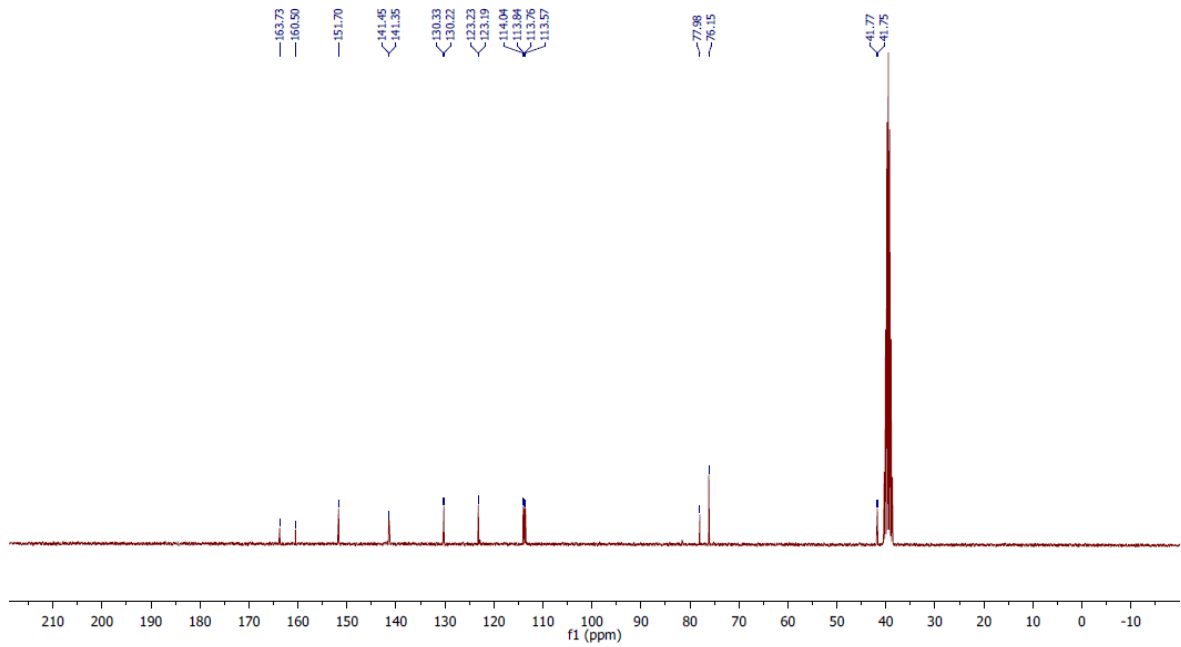

| Parameter         | Value       |
|-------------------|-------------|
| 1 Title           | Compound 8c |
| 2 Solvent         | DMSO        |
| 3 Experiment      | DEPT-135    |
| 4 Number of Scans | 512         |

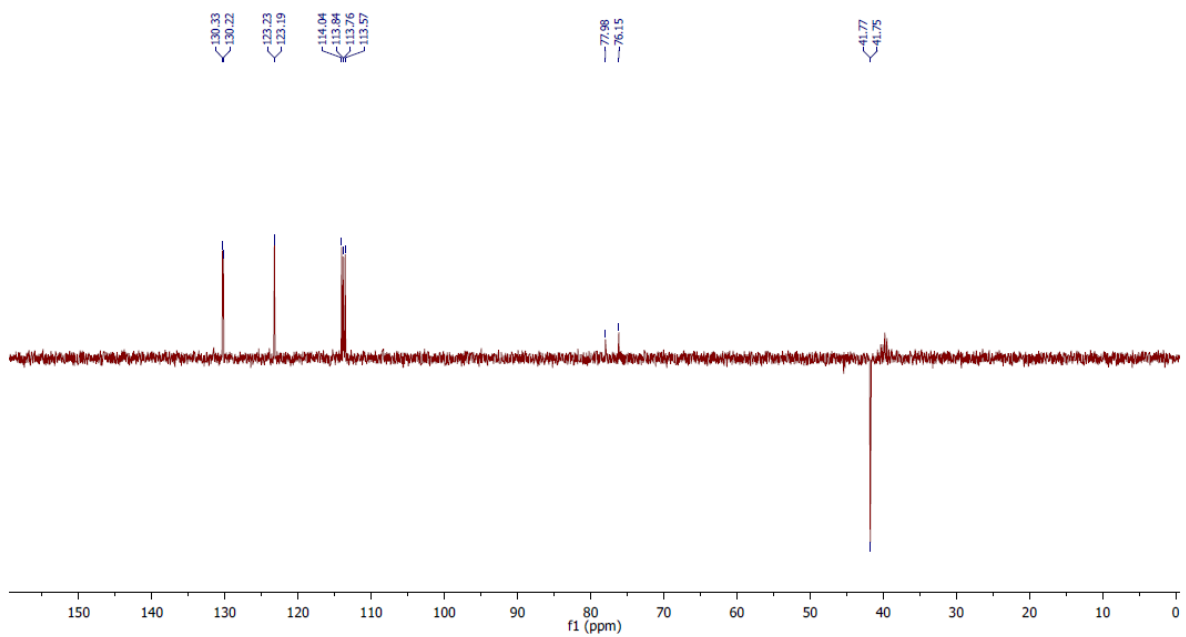

| Parameter         | Value       |
|-------------------|-------------|
| 1 Title           | Compound 8c |
| 2 Solvent         | DMSO        |
| 3 Experiment      | DEPT-90     |
| 4 Number of Scans | 512         |

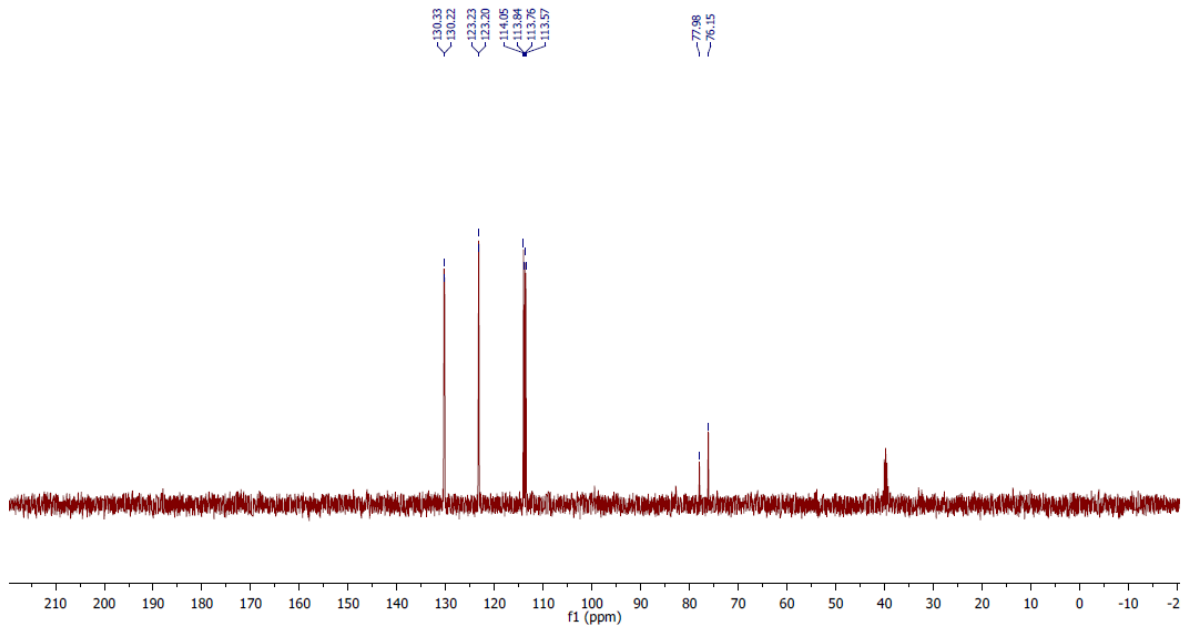

| Parameter         | Value       |
|-------------------|-------------|
| 1 Title           | Compound 8c |
| 2 Solvent         | DMSO        |
| 3 Experiment      | 19F         |
| 4 Number of Scans | 32          |

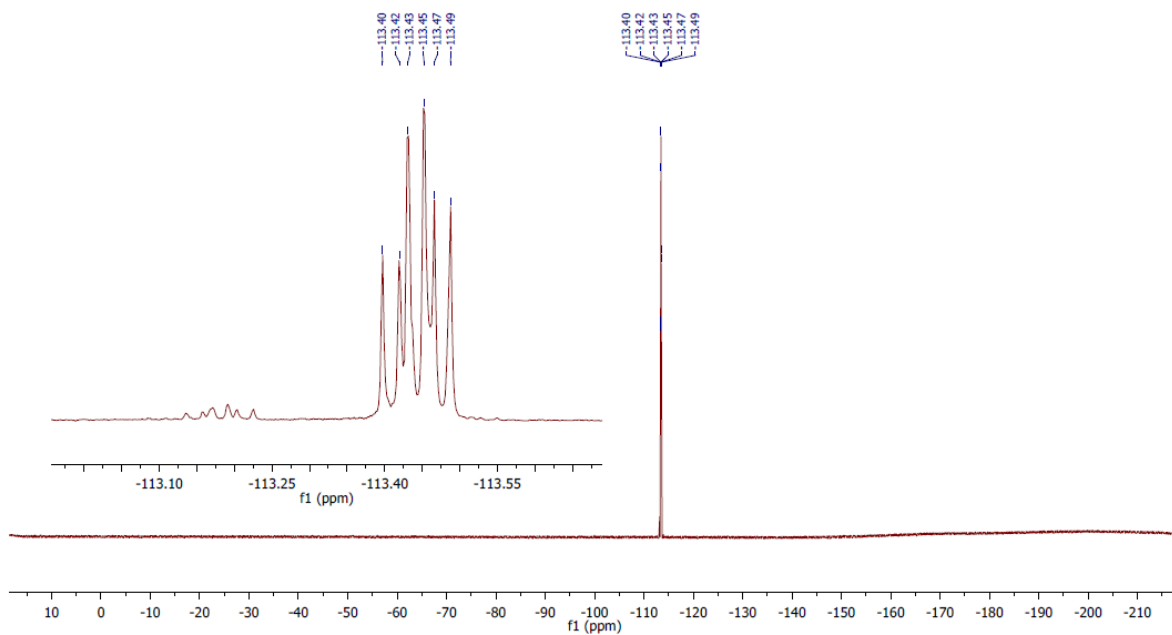

# N-[(4-Fluorophenyl)methyl]prop-2-ynamide (8d)

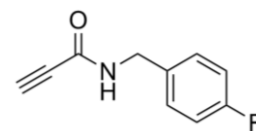

| Parameter         | Value       |
|-------------------|-------------|
| 1 Title           | Compound 8d |
| 2 Solvent         | DMSO        |
| 3 Experiment      | 1D          |
| 4 Number of Scans | 32          |

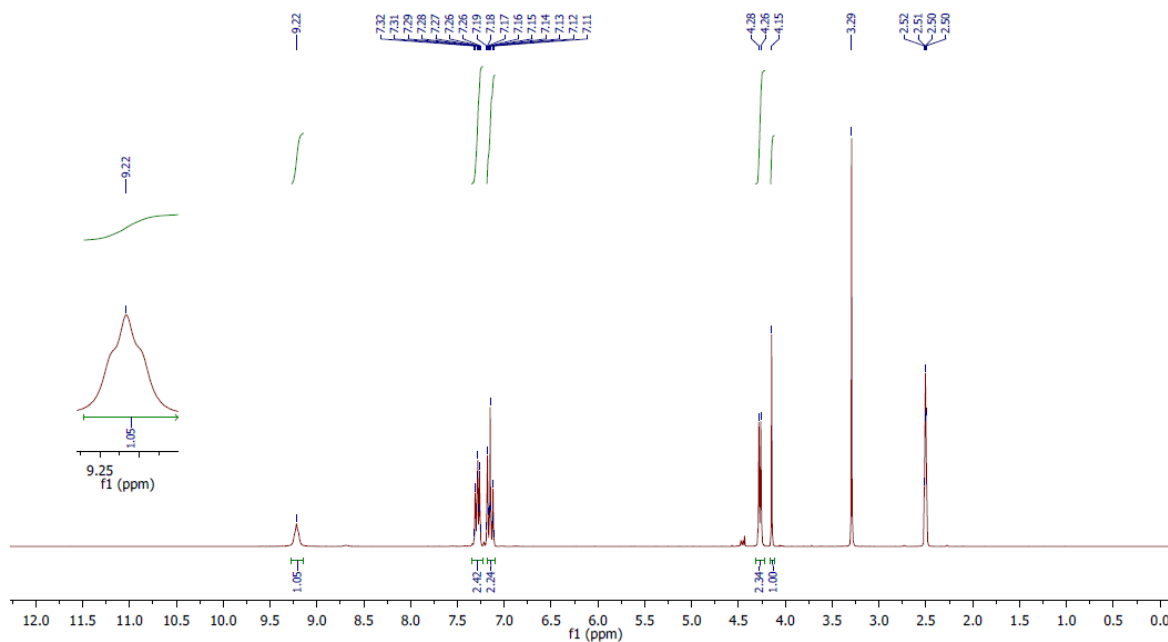

| Parameter         | Value       |
|-------------------|-------------|
| 1 Title           | Compound 8d |
| 2 Solvent         | DMSO        |
| 3 Experiment      | 13C         |
| 4 Number of Scans | 2048        |

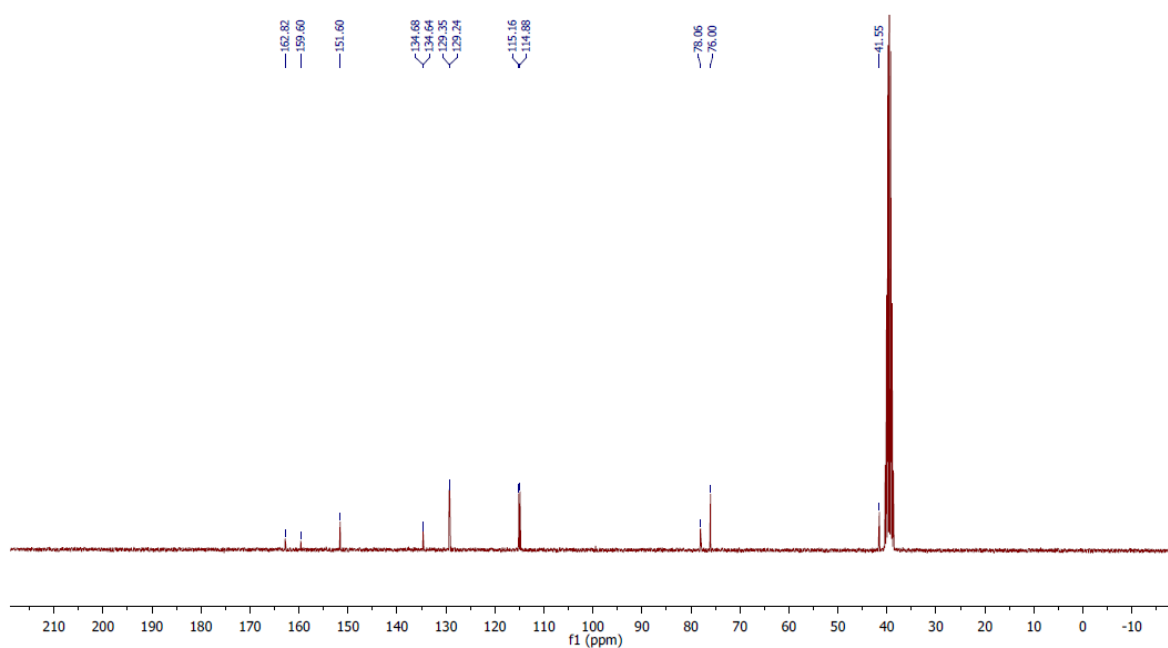

| Parameter         | Value       |
|-------------------|-------------|
| 1 Title           | Compound 8d |
| 2 Solvent         | DMSO        |
| 3 Experiment      | DEPT-135    |
| 4 Number of Scans | 512         |

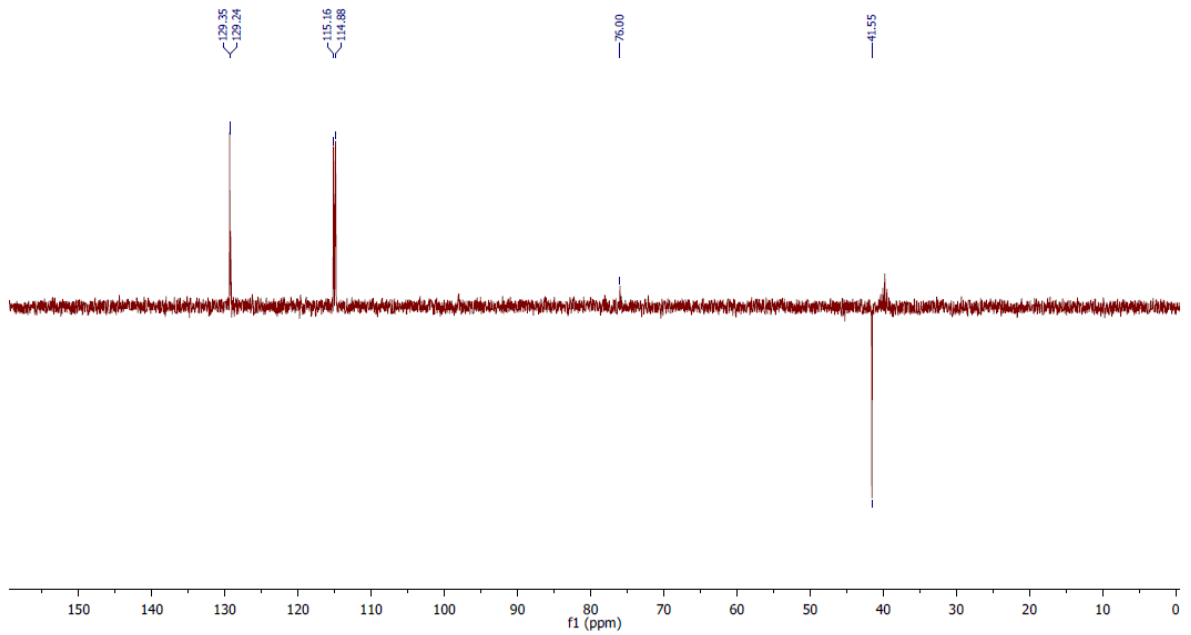

| Parameter         | Value       |
|-------------------|-------------|
| 1 Title           | Compound 8d |
| 2 Solvent         | DMSO        |
| 3 Experiment      | DEPT-90     |
| 4 Number of Scans | 512         |

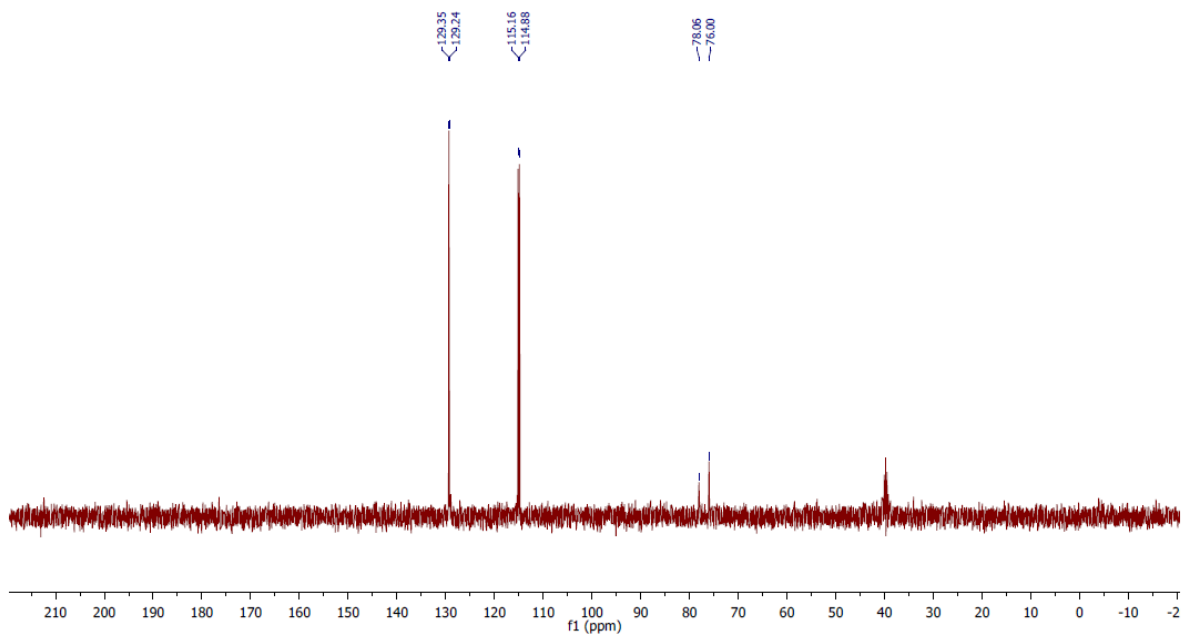

| Parameter         | Value       |
|-------------------|-------------|
| 1 Title           | Compound 8d |
| 2 Solvent         | DMSO        |
| 3 Experiment      | 19F         |
| 4 Number of Scans | 32          |

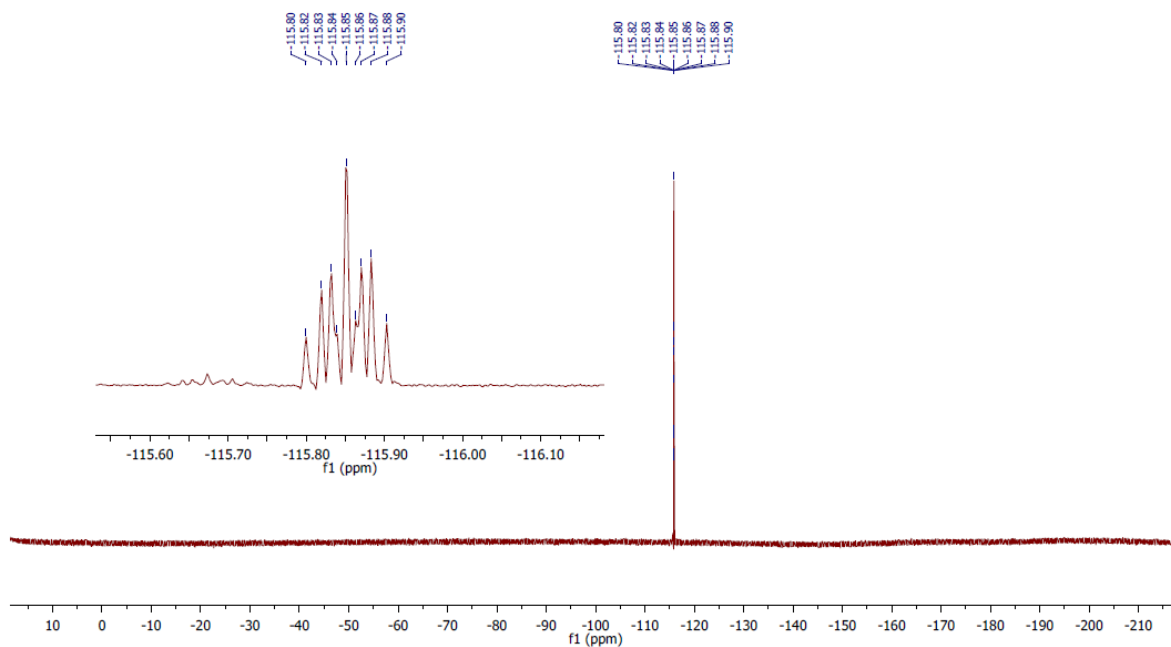

### N-[(3-Methoxyphenyl)methyl]prop-2-ynamide (8e)

| Parameter         | Value       |
|-------------------|-------------|
| 1 Title           | Compound 8e |
| 2 Solvent         | DMSO        |
| 3 Experiment      | 1D          |
| 4 Number of Scans | 32          |

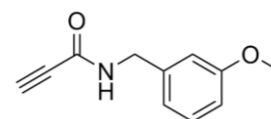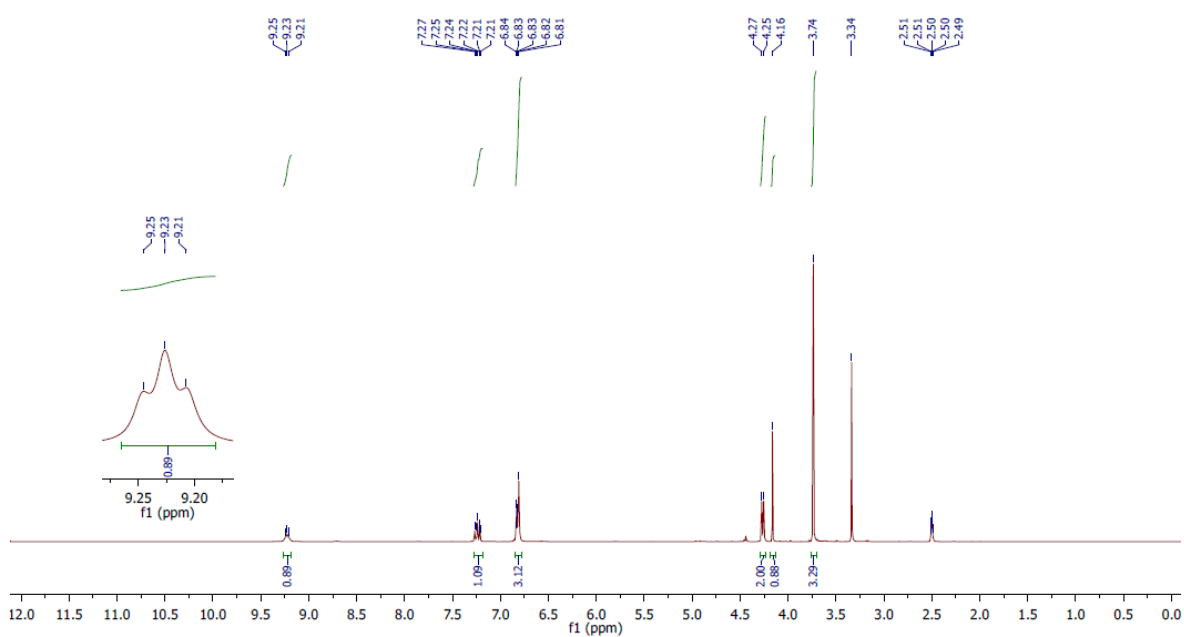



| Parameter         | Value       |
|-------------------|-------------|
| 1 Title           | Compound 8e |
| 2 Solvent         | DMSO        |
| 3 Experiment      | 13C         |
| 4 Number of Scans | 2048        |

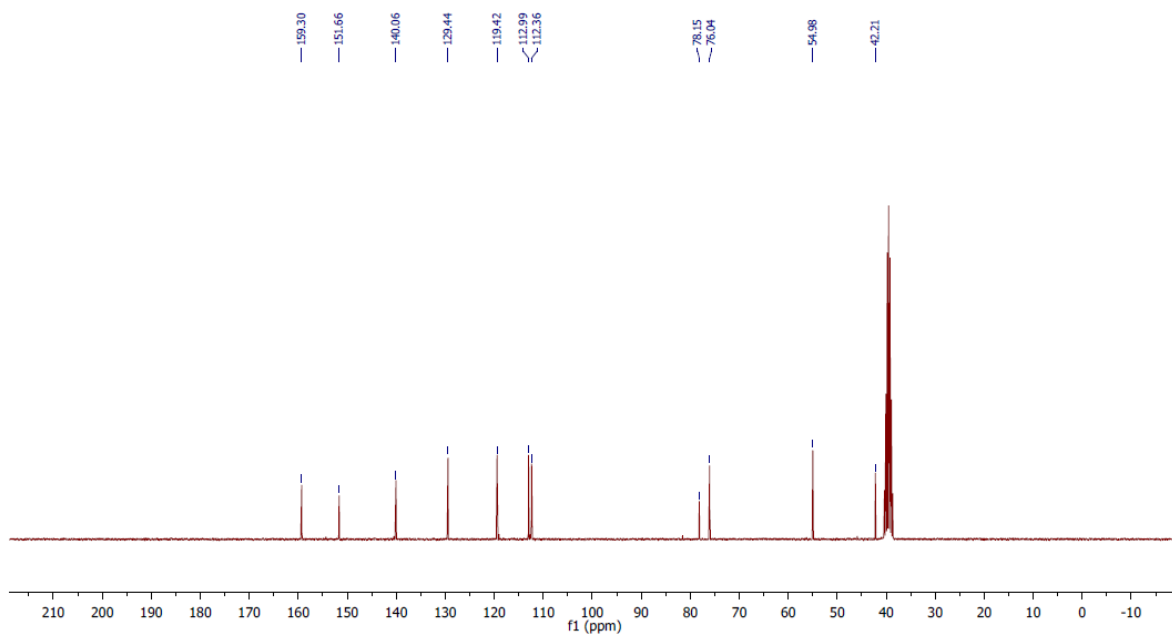

| Parameter         | Value       |
|-------------------|-------------|
| 1 Title           | Compound 8e |
| 2 Solvent         | DMSO        |
| 3 Experiment      | DEPT-135    |
| 4 Number of Scans | 512         |

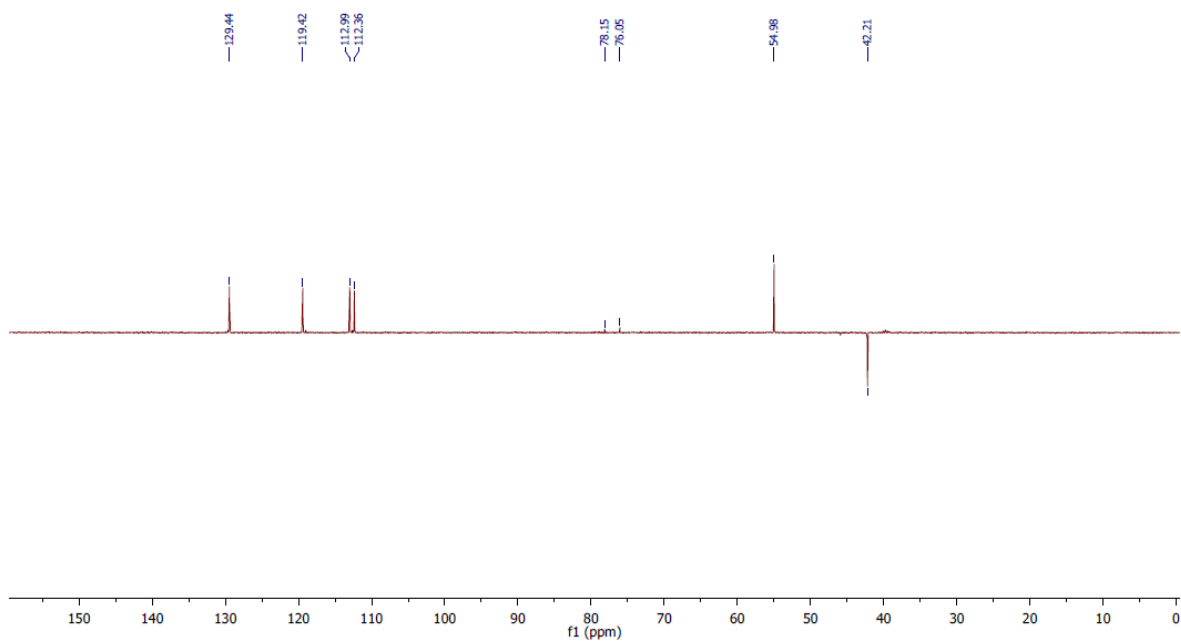

| Parameter         | Value       |
|-------------------|-------------|
| 1 Title           | Compound 8e |
| 2 Solvent         | DMSO        |
| 3 Experiment      | DEPT-90     |
| 4 Number of Scans | 512         |

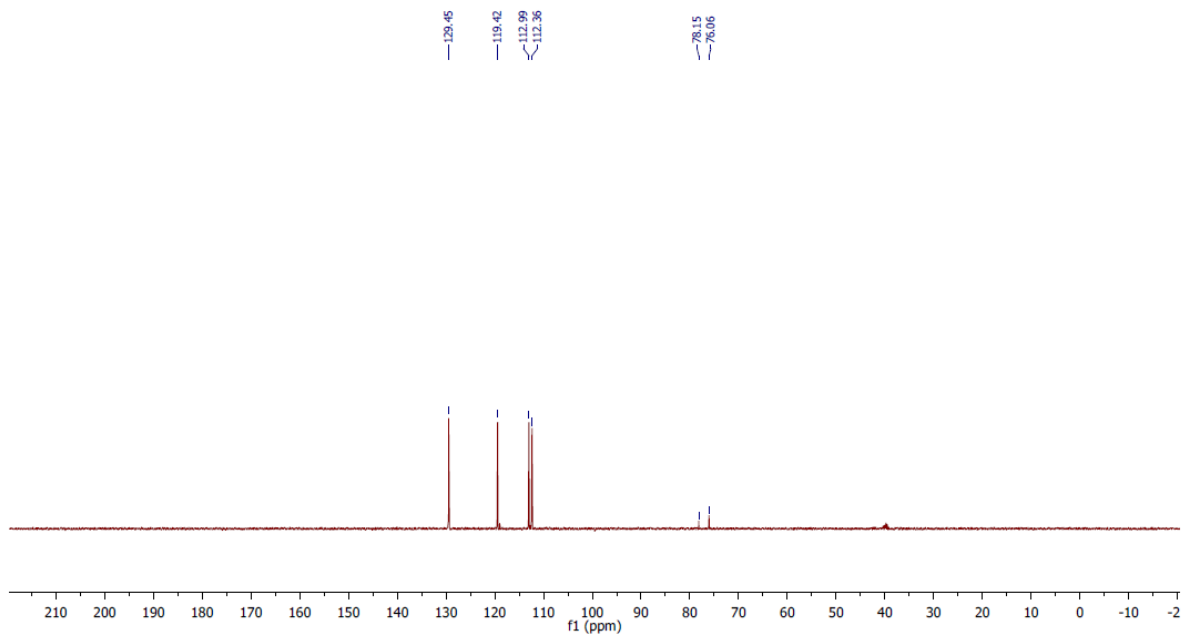

### Methyl 4-[3-(prop-2-ynamidomethyl)phenoxy]butanoate (8f)

| Parameter         | Value       |
|-------------------|-------------|
| 1 Title           | Compound 8f |
| 2 Solvent         | DMSO        |
| 3 Experiment      | 1D          |
| 4 Number of Scans | 32          |

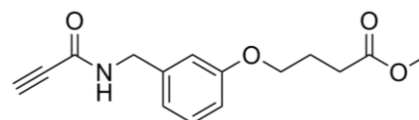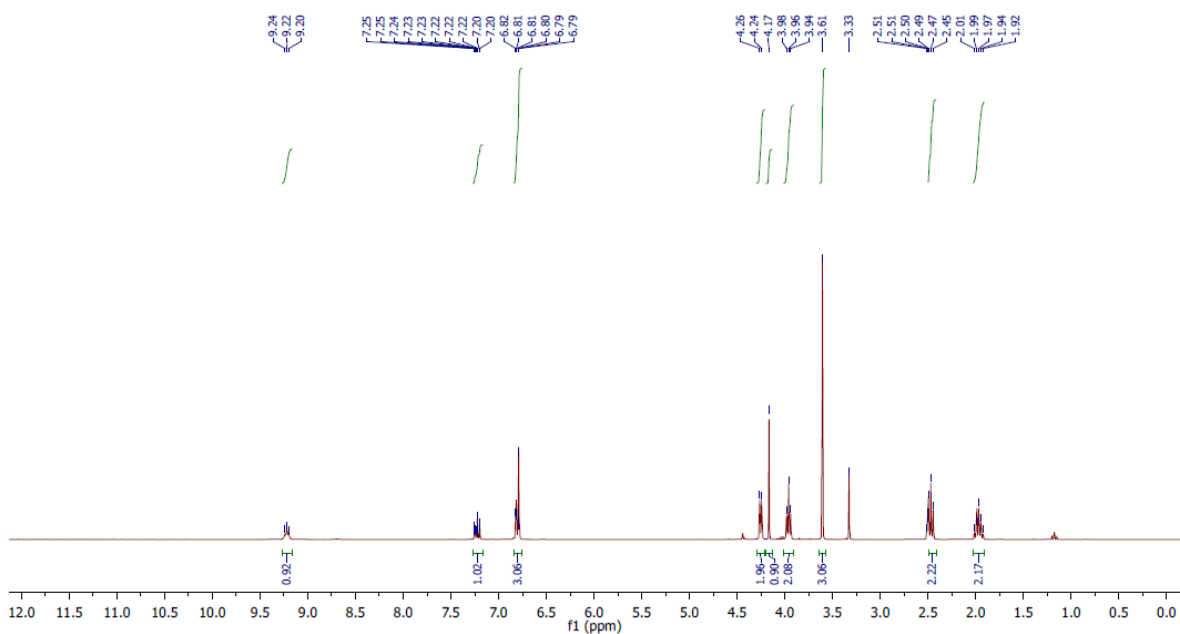

| Parameter         | Value       |
|-------------------|-------------|
| 1 Title           | Compound 8f |
| 2 Solvent         | DMSO        |
| 3 Experiment      | 13C         |
| 4 Number of Scans | 2048        |

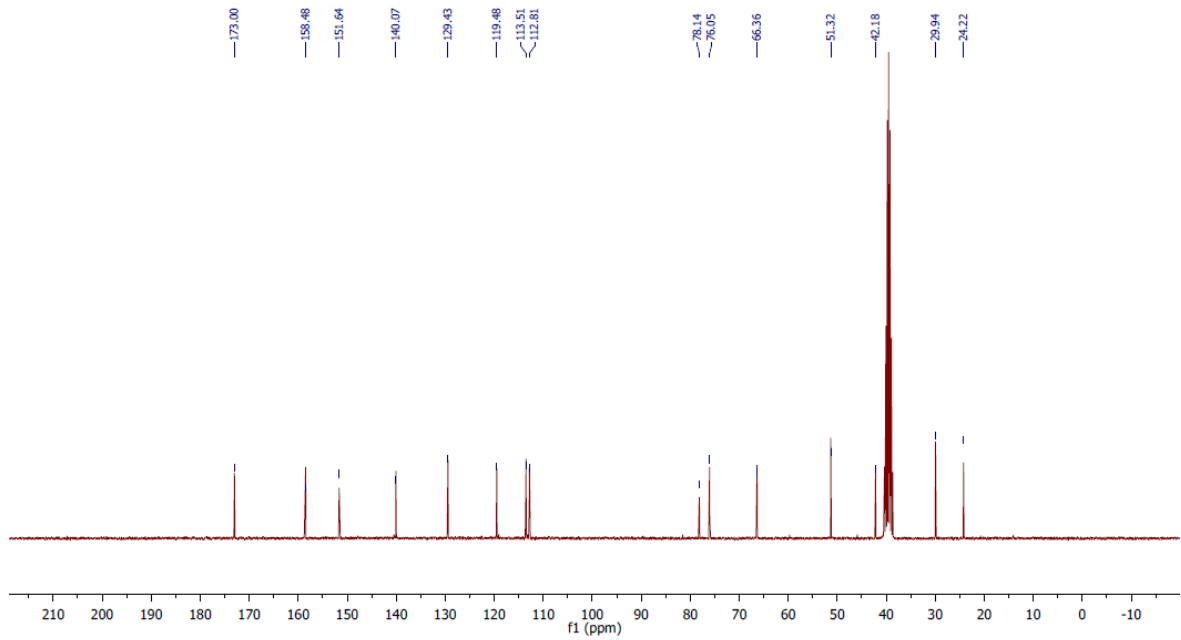

| Parameter         | Value       |
|-------------------|-------------|
| 1 Title           | Compound 8f |
| 2 Solvent         | DMSO        |
| 3 Experiment      | DEPT-135    |
| 4 Number of Scans | 512         |

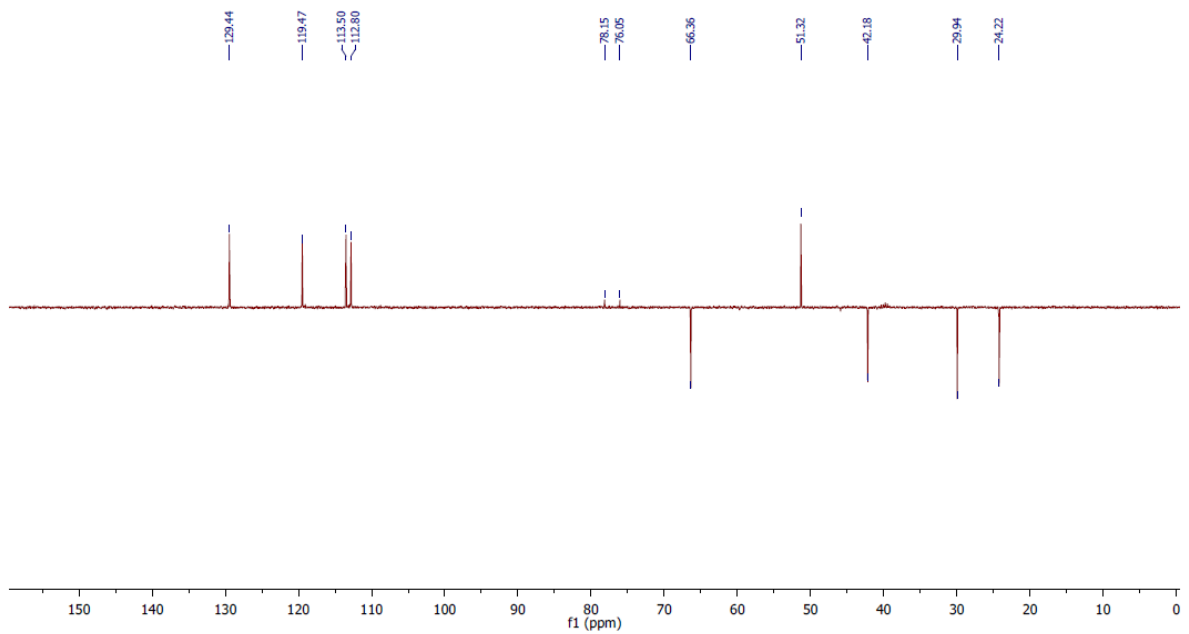

| Parameter         | Value       |
|-------------------|-------------|
| 1 Title           | Compound 8f |
| 2 Solvent         | DMSO        |
| 3 Experiment      | DEPT-90     |
| 4 Number of Scans | 512         |

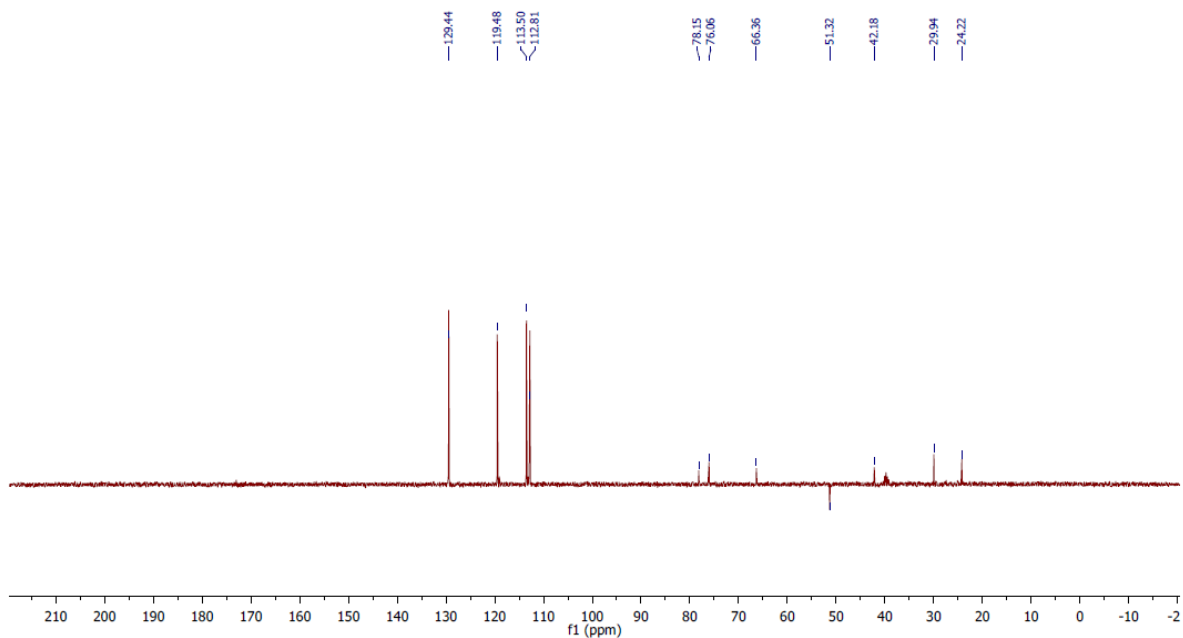

#### 4-[3-(Prop-2-ynamidomethyl)phenoxy]butanoic acid (8g)

| Parameter         | Value       |
|-------------------|-------------|
| 1 Title           | Compound 8g |
| 2 Solvent         | DMSO        |
| 3 Experiment      | 1D          |
| 4 Number of Scans | 32          |

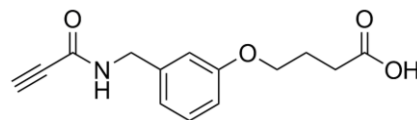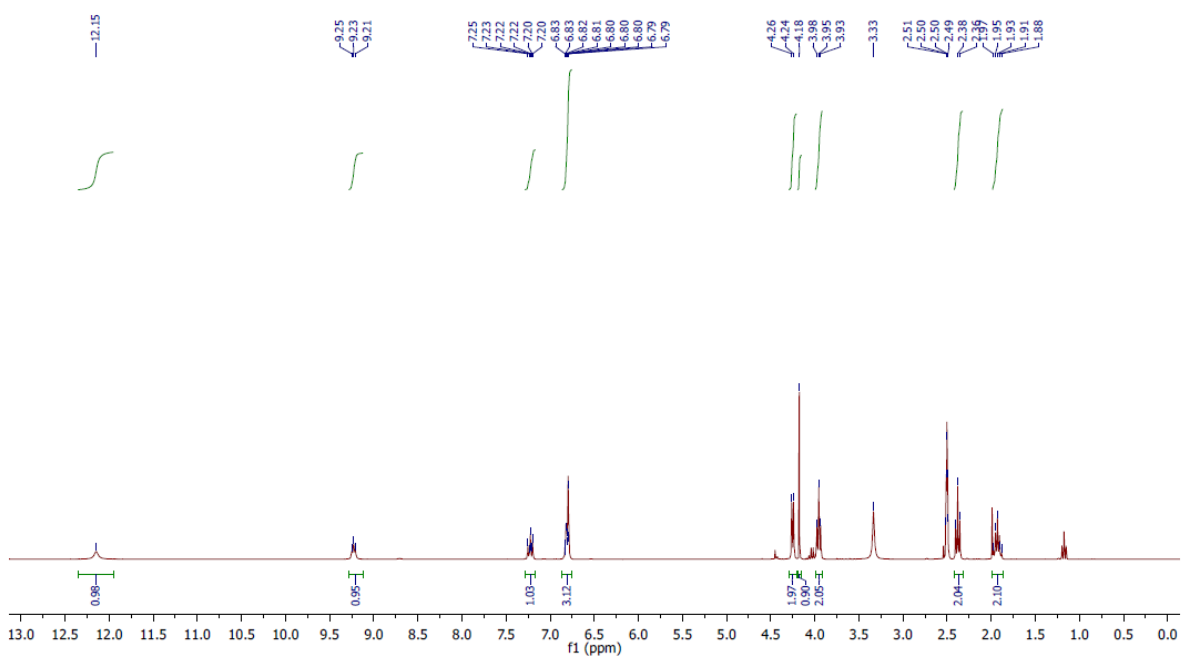

| Parameter         | Value       |
|-------------------|-------------|
| 1 Title           | Compound 8g |
| 2 Solvent         | DMSO        |
| 3 Experiment      | 13C         |
| 4 Number of Scans | 2048        |

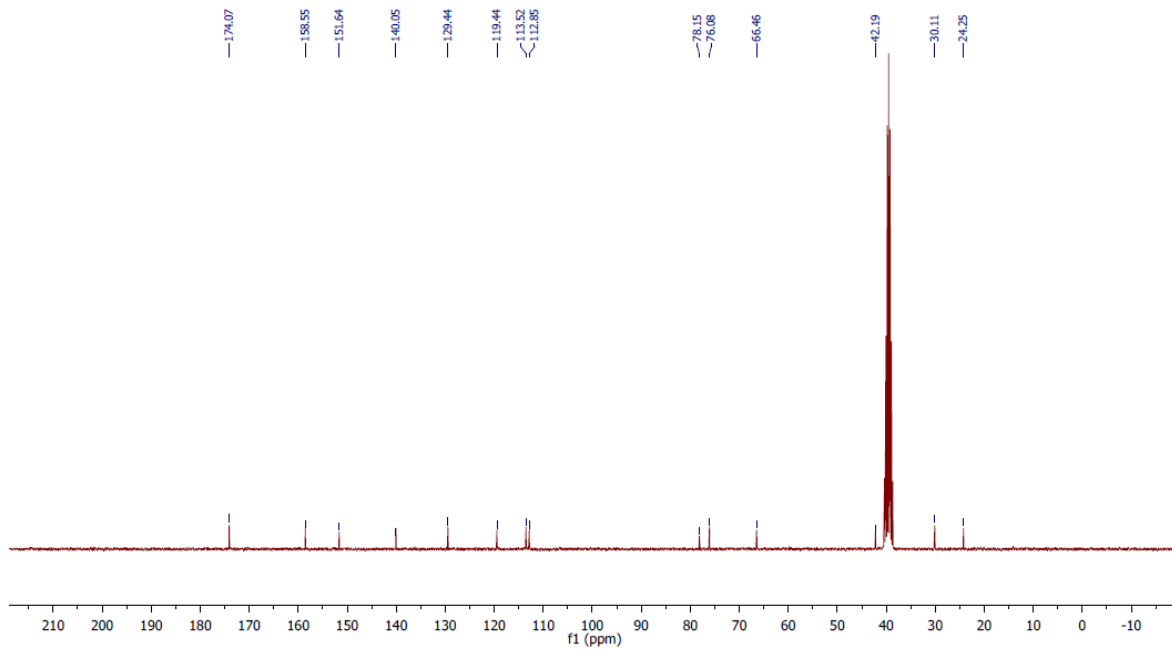

| Parameter         | Value       |
|-------------------|-------------|
| 1 Title           | Compound 8g |
| 2 Solvent         | DMSO        |
| 3 Experiment      | DEPT-135    |
| 4 Number of Scans | 512         |

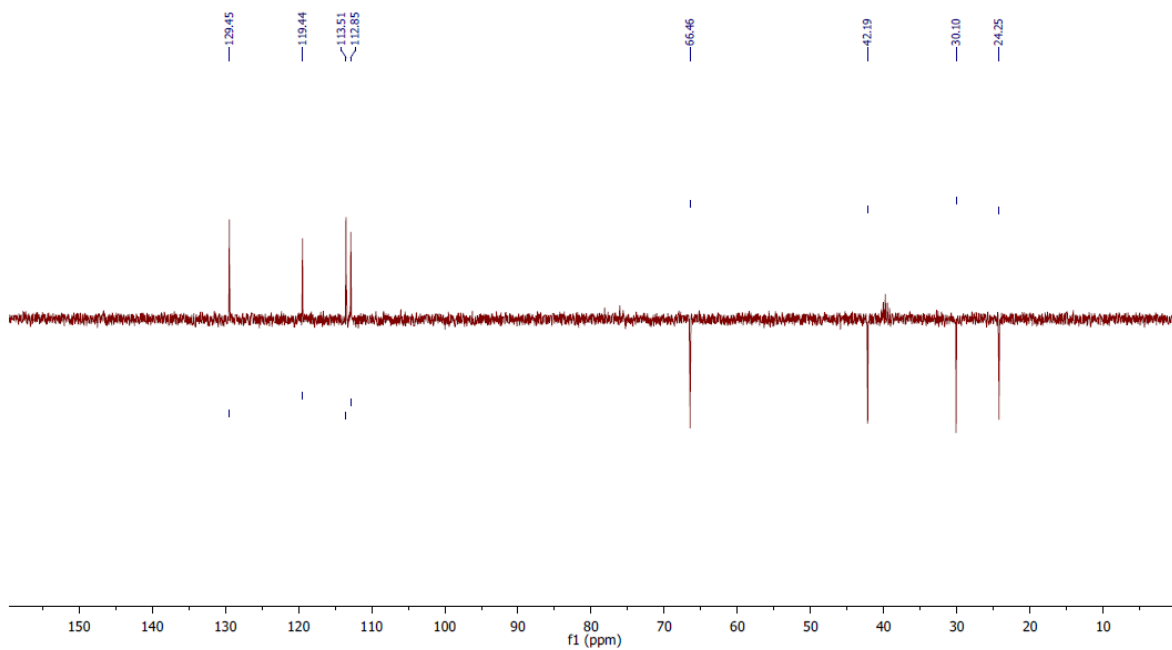

| Parameter         | Value       |
|-------------------|-------------|
| 1 Title           | Compound 8g |
| 2 Solvent         | DMSO        |
| 3 Experiment      | DEPT-90     |
| 4 Number of Scans | 512         |

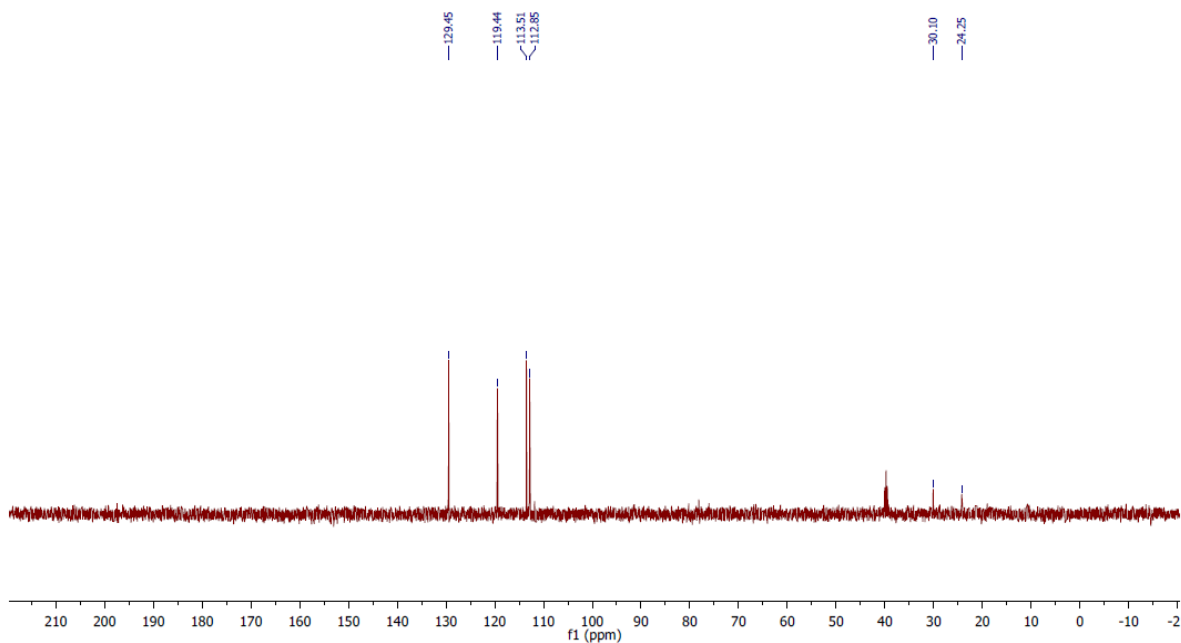

### *N*-Benzyl-3-(1-benzyl-2,4-dioxo-1,2,3,4-tetrahydropyrimidin-5-yl)prop-2-ynamide (2)

| Parameter         | Value      |
|-------------------|------------|
| 1 Title           | Compound 2 |
| 2 Solvent         | DMSO       |
| 3 Experiment      | 1D         |
| 4 Number of Scans | 4          |

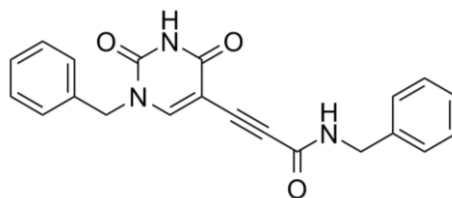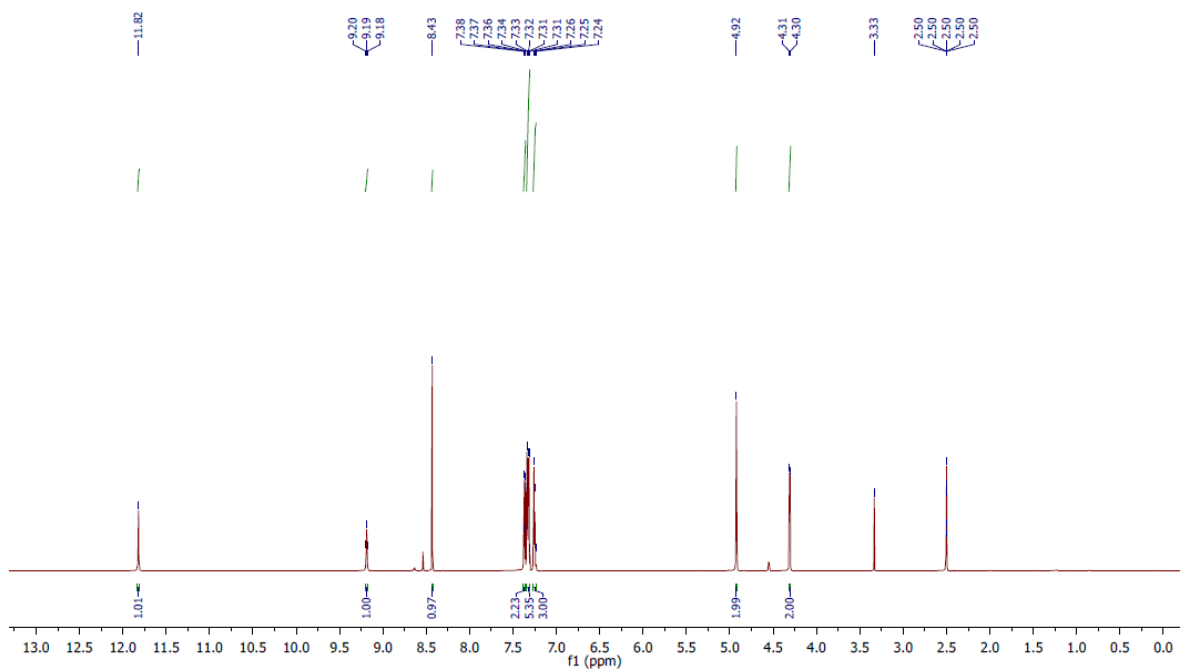

| Parameter         | Value      |
|-------------------|------------|
| 1 Title           | Compound 2 |
| 2 Solvent         | DMSO       |
| 3 Experiment      | 13C        |
| 4 Number of Scans | 207        |

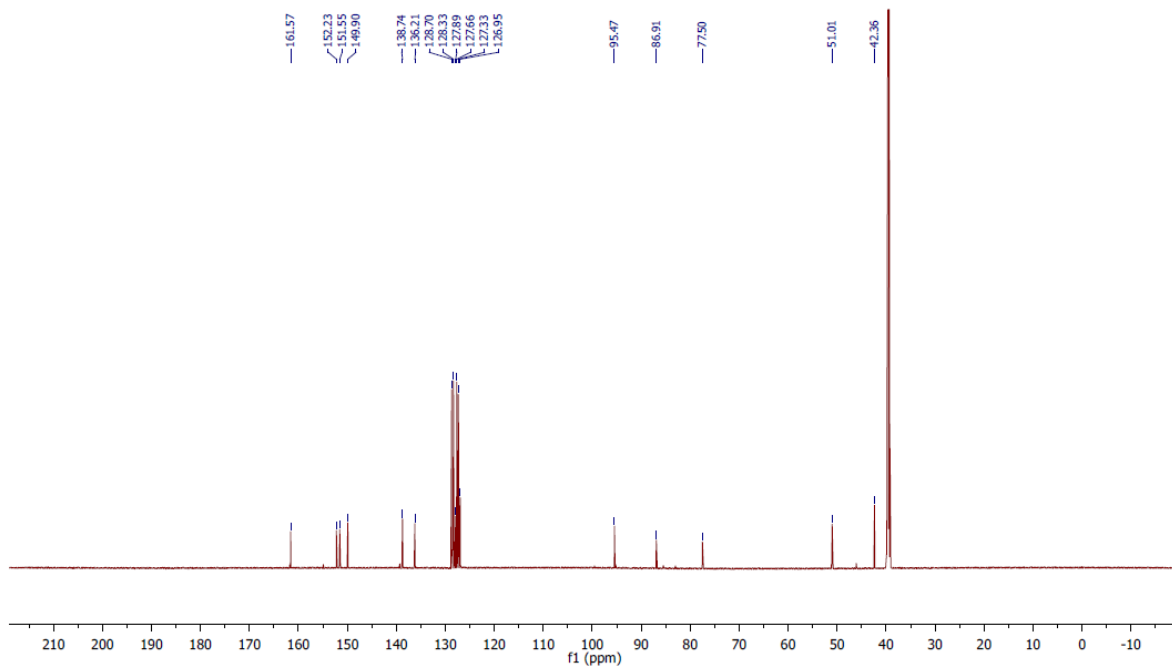

| Parameter         | Value      |
|-------------------|------------|
| 1 Title           | Compound 2 |
| 2 Solvent         | DMSO       |
| 3 Experiment      | DEPT-135   |
| 4 Number of Scans | 16         |

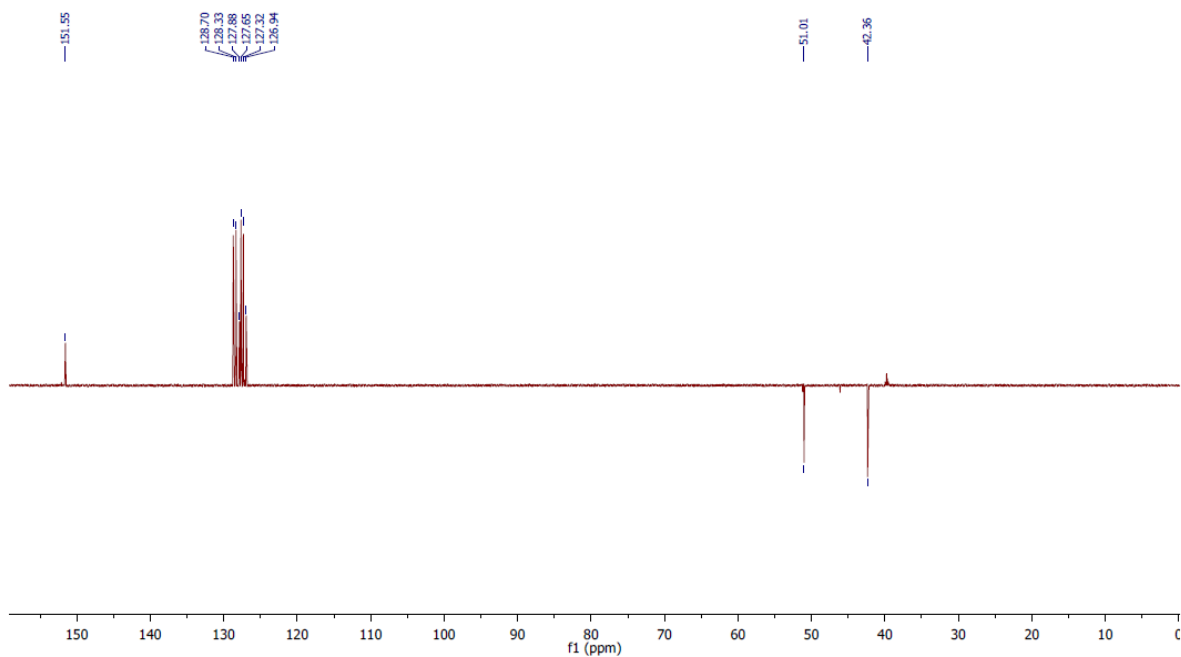

| Parameter         | Value      |
|-------------------|------------|
| 1 Title           | Compound 2 |
| 2 Solvent         | DMSO       |
| 3 Experiment      | JMOD       |
| 4 Number of Scans | 109        |

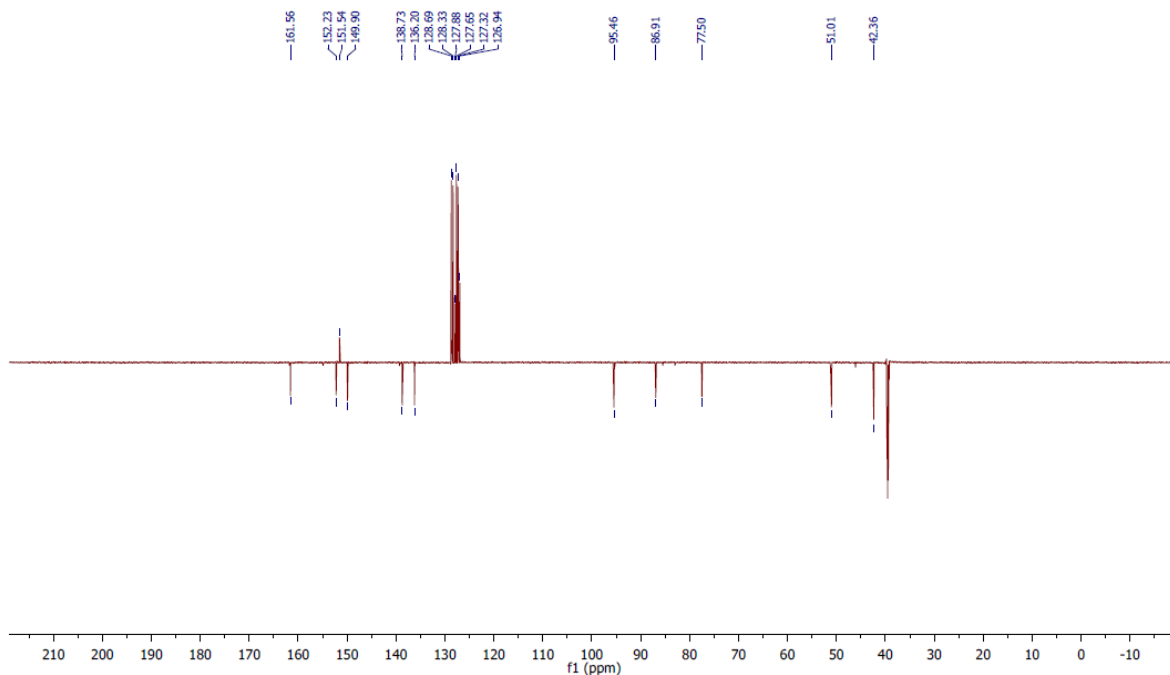

**4-[[5-(2-[[[(3-methoxyphenyl)methyl]carbamoyl]eth-1-yn-1-yl)-2,4-dioxo-1,2,3,4-tetrahydropyrimidin-1-yl]methyl]benzoic acid (3)**

| Parameter         | Value      |
|-------------------|------------|
| 1 Title           | Compound 3 |
| 2 Solvent         | DMSO       |
| 3 Experiment      | 1D         |
| 4 Number of Scans | 16         |

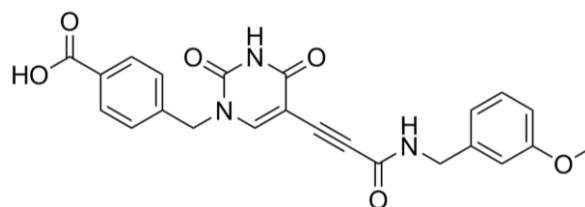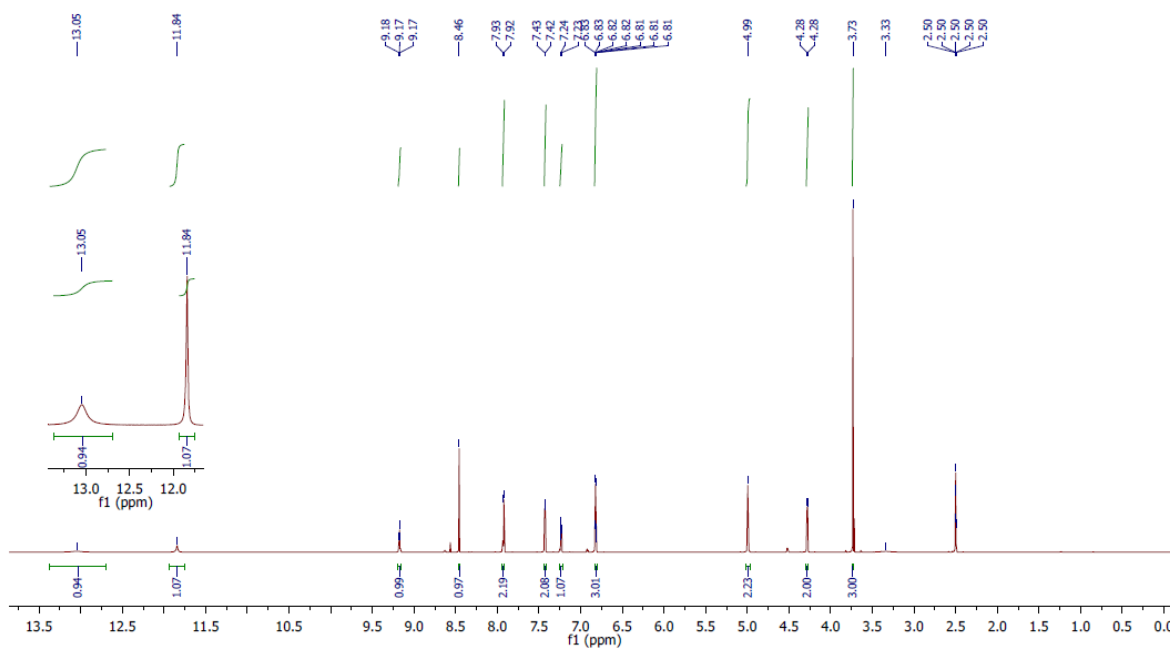



| Parameter         | Value      |
|-------------------|------------|
| 1 Title           | Compound 3 |
| 2 Solvent         | DMSO       |
| 3 Experiment      | 13C        |
| 4 Number of Scans | 1024       |

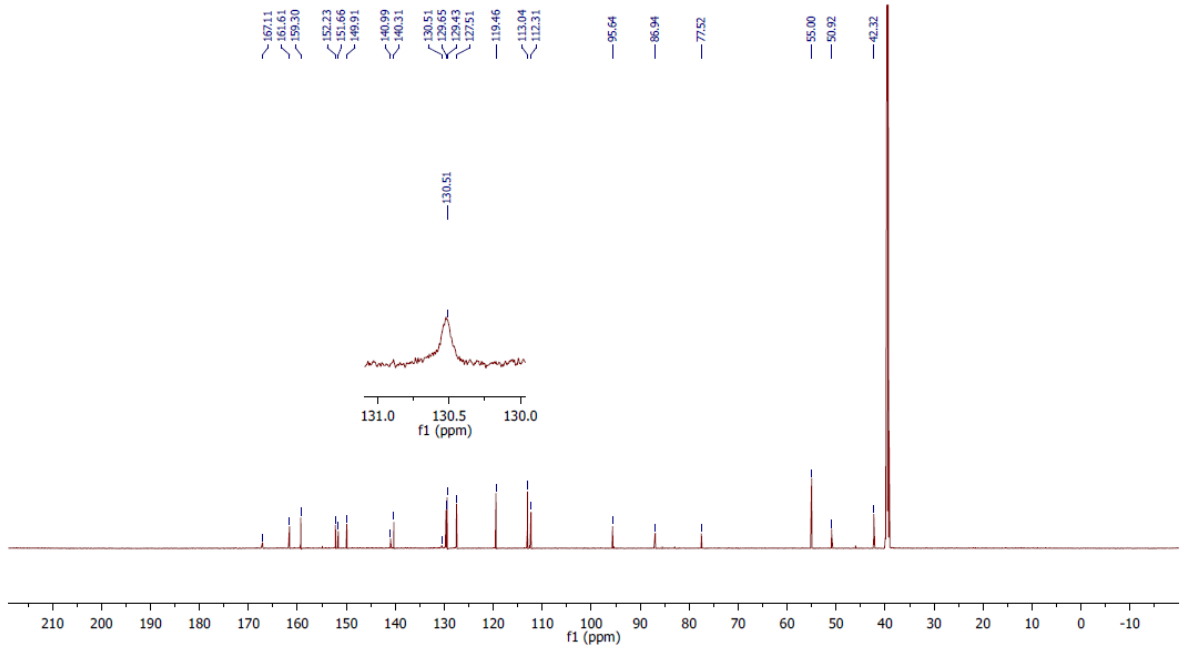

| Parameter         | Value      |
|-------------------|------------|
| 1 Title           | Compound 3 |
| 2 Solvent         | DMSO       |
| 3 Experiment      | DEPT-135   |
| 4 Number of Scans | 16         |

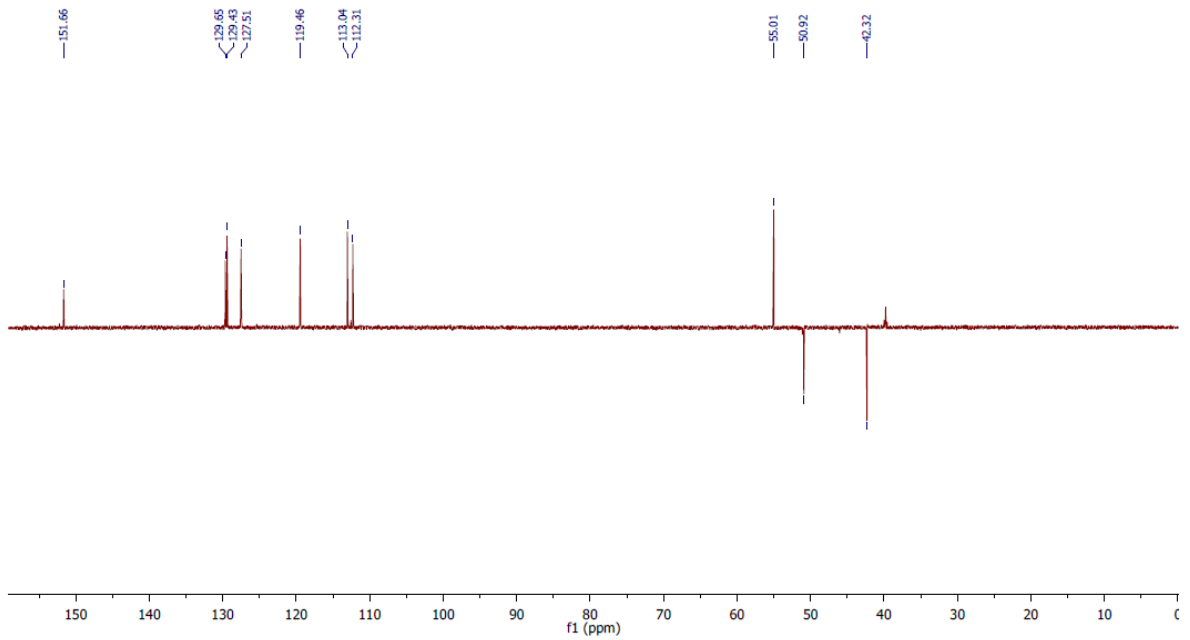

| Parameter         | Value      |
|-------------------|------------|
| 1 Title           | Compound 3 |
| 2 Solvent         | DMSO       |
| 3 Experiment      | JMOD       |
| 4 Number of Scans | 64         |

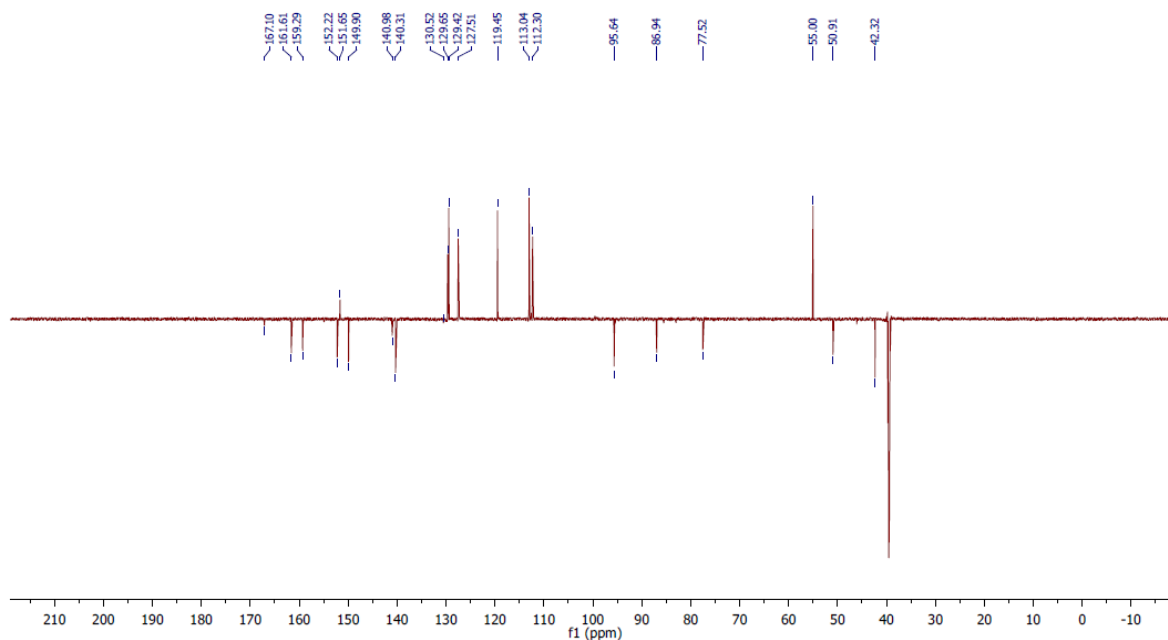

**4-({5-[2-({[3-(3-Carboxypropoxy)phenyl]methyl}carbamoyl)eth-1-yn-1-yl]-2,4-dioxo-1,2,3,4-tetrahydropyrimidin-1-yl}methyl)benzoic acid (4)**

| Parameter         | Value      |
|-------------------|------------|
| 1 Title           | Compound 4 |
| 2 Solvent         | DMSO       |
| 3 Experiment      | 1D         |
| 4 Number of Scans | 1          |

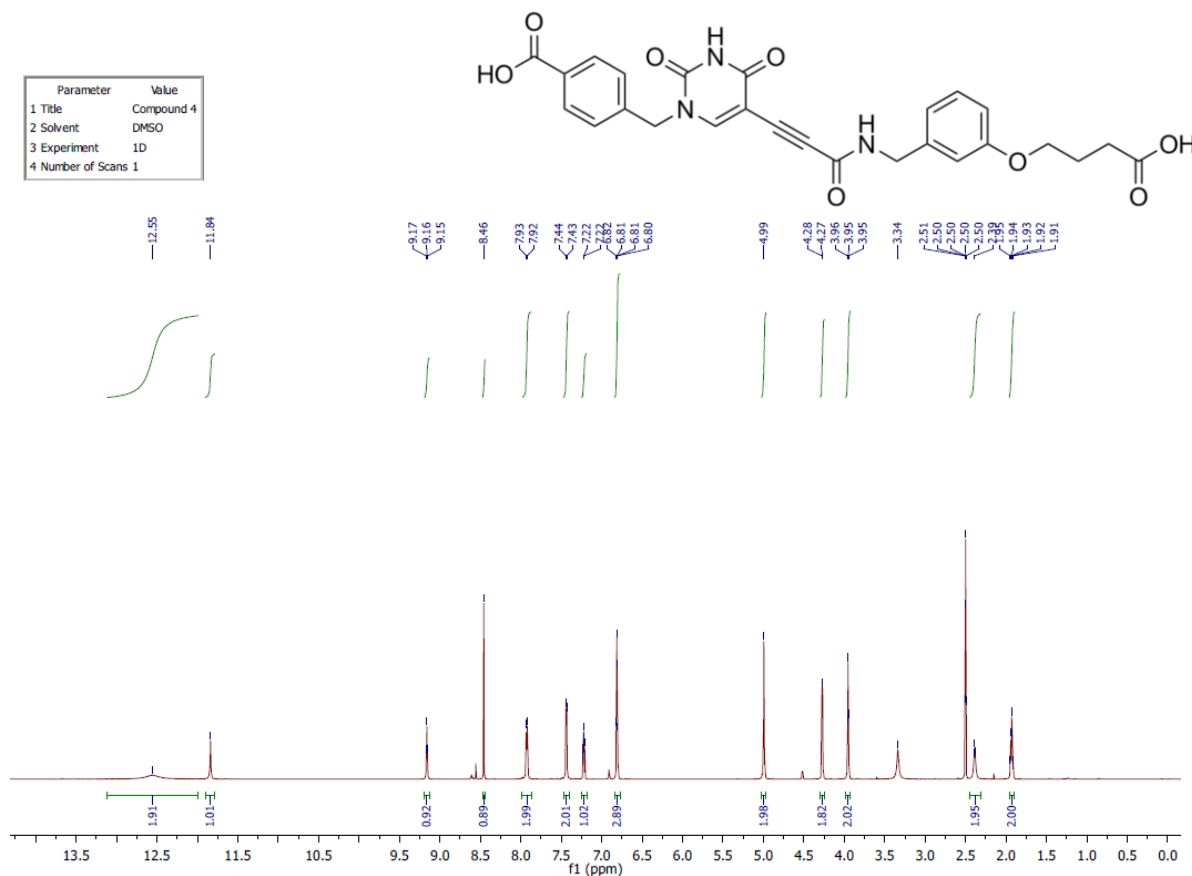

| Parameter         | Value      |
|-------------------|------------|
| 1 Title           | Compound 4 |
| 2 Solvent         | DMSO       |
| 3 Experiment      | 13C        |
| 4 Number of Scans | 1024       |

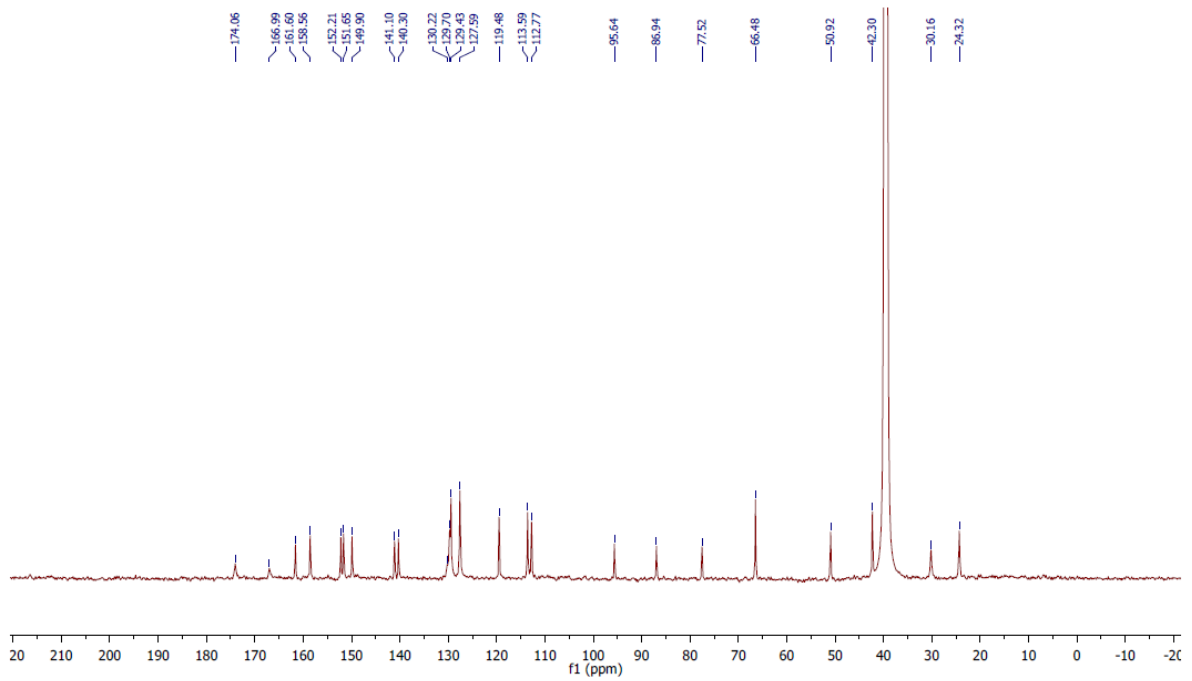

| Parameter         | Value      |
|-------------------|------------|
| 1 Title           | Compound 4 |
| 2 Solvent         | DMSO       |
| 3 Experiment      | DEPT-135   |
| 4 Number of Scans | 512        |

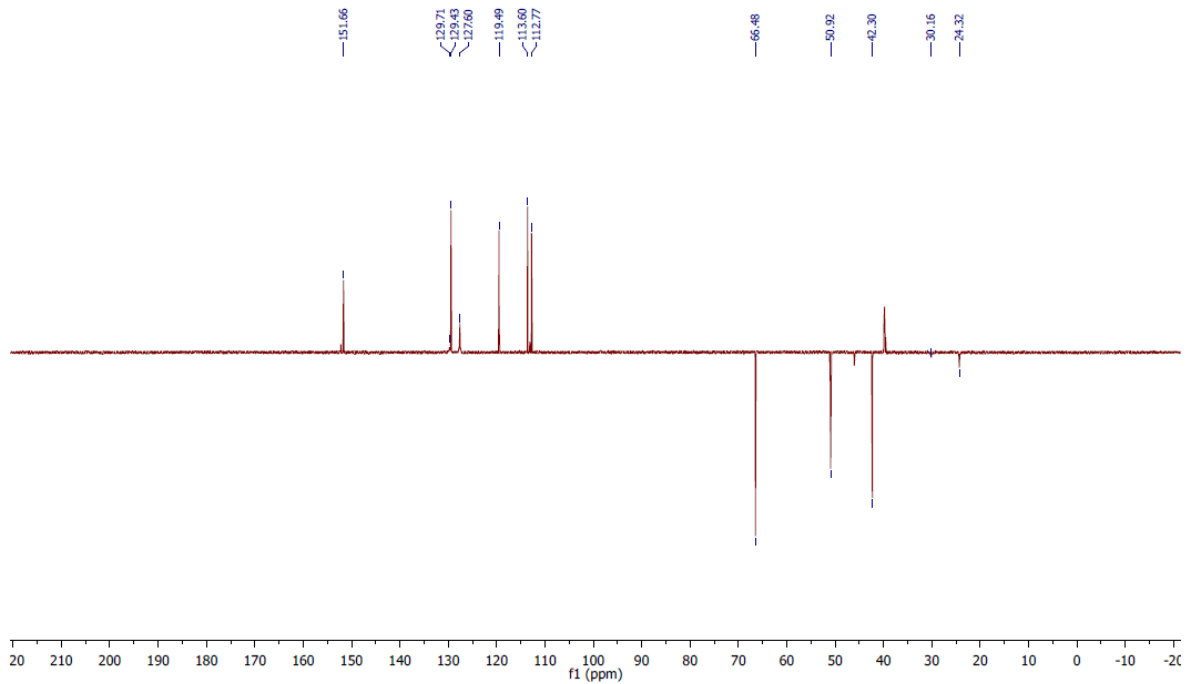

| Parameter         | Value      |
|-------------------|------------|
| 1 Title           | Compound 4 |
| 2 Solvent         | DMSO       |
| 3 Experiment      | DEPT-90    |
| 4 Number of Scans | 512        |

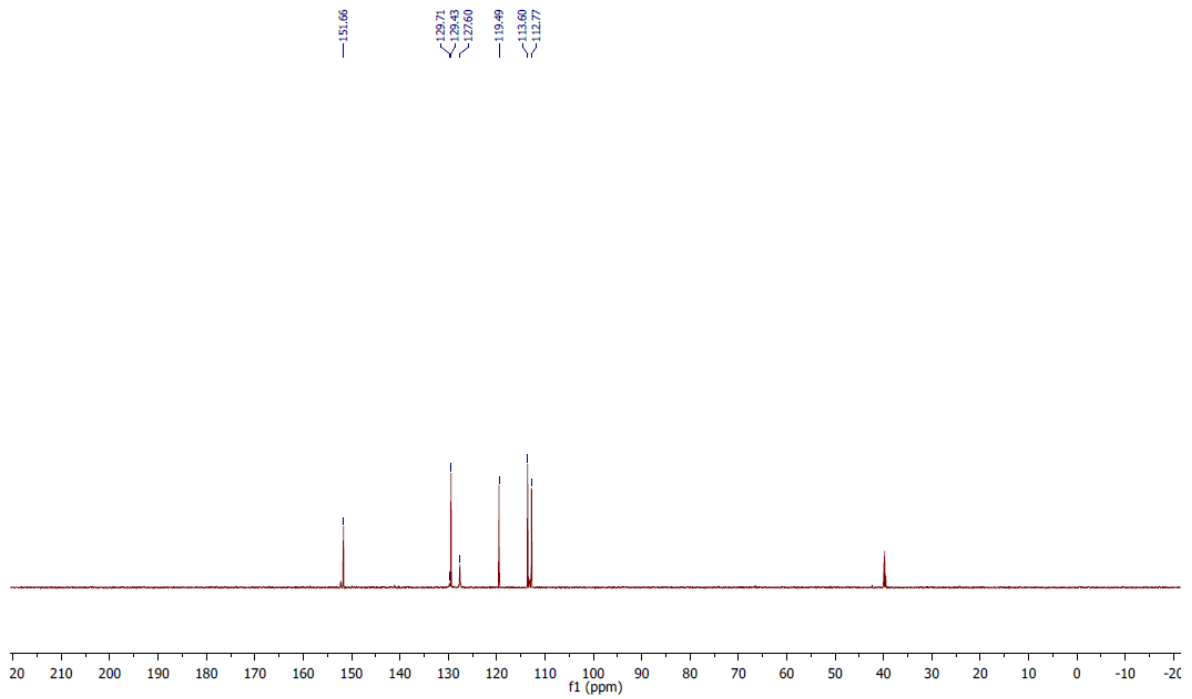

| Parameter         | Value      |
|-------------------|------------|
| 1 Title           | Compound 4 |
| 2 Solvent         | DMSO       |
| 3 Experiment      | 13C-HSQC   |
| 4 Number of Scans | 48         |

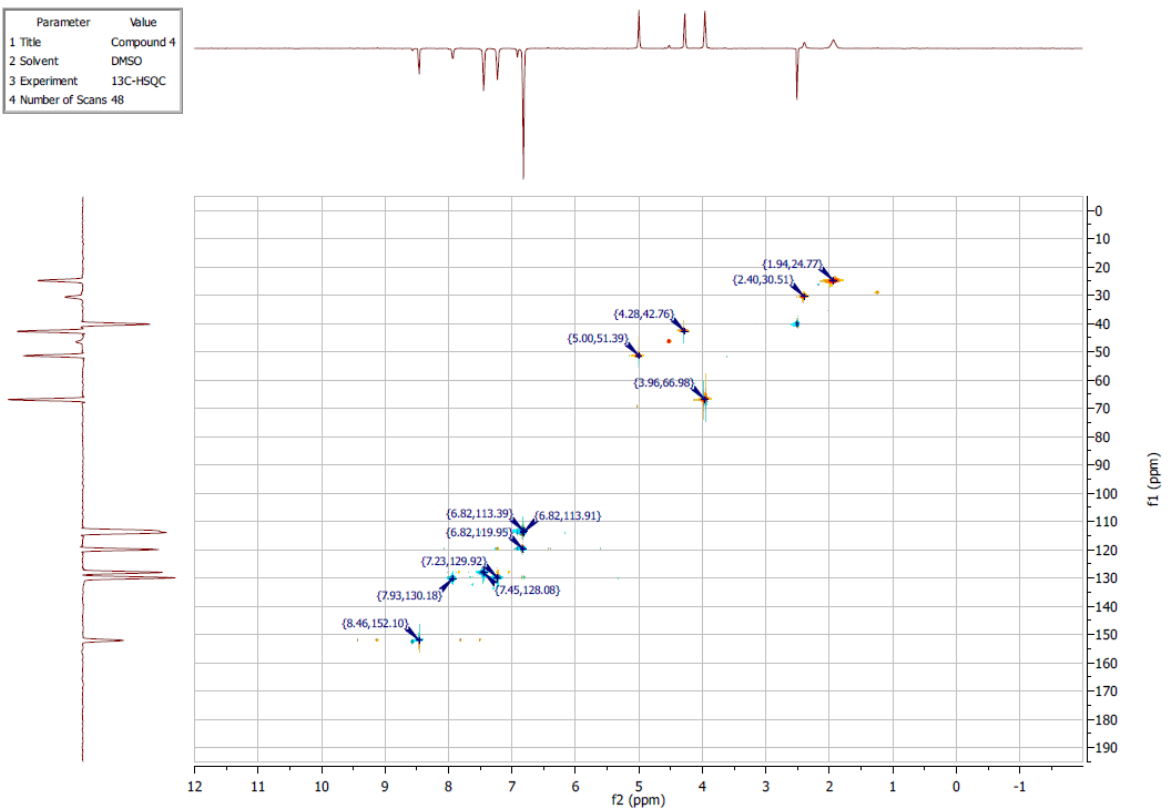

### 3-(1-Benzyl-2,4-dioxo-1,2,3,4-tetrahydropyrimidin-5-yl)-N-[(2-fluorophenyl)methyl]prop-2-ynamide (9a)

| Parameter         | Value       |
|-------------------|-------------|
| 1 Title           | Compound 9a |
| 2 Solvent         | DMSO        |
| 3 Experiment      | 1D          |
| 4 Number of Scans | 32          |

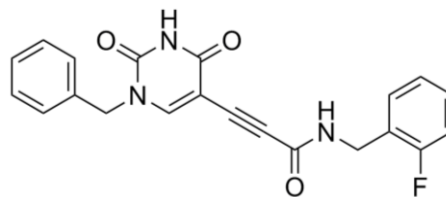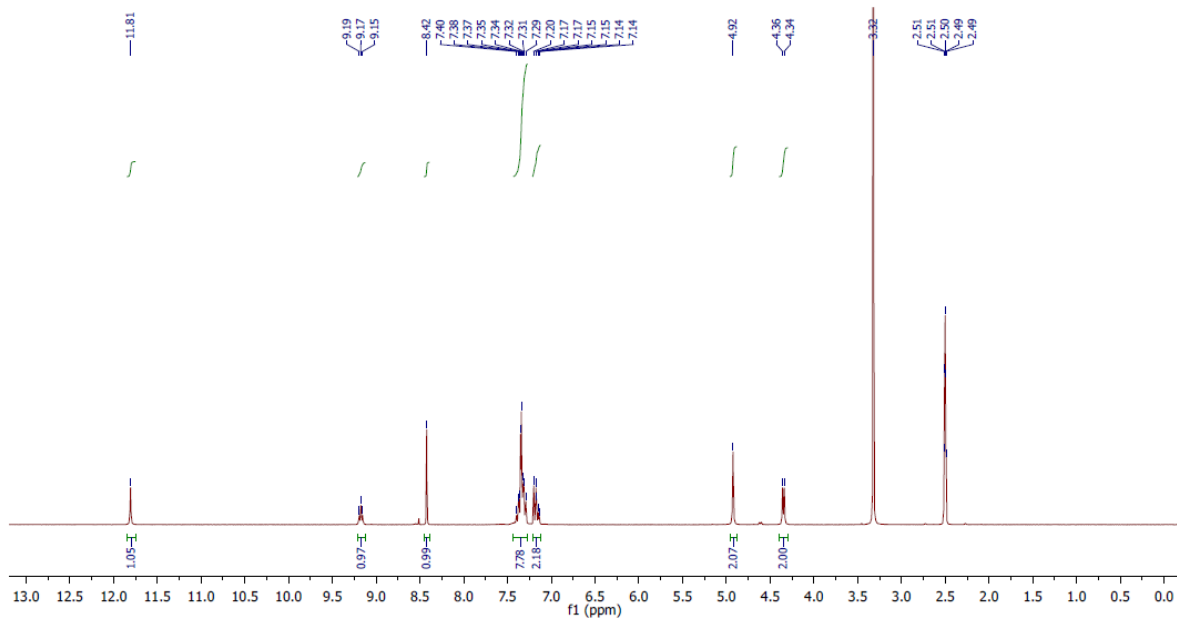

| Parameter         | Value       |
|-------------------|-------------|
| 1 Title           | Compound 9a |
| 2 Solvent         | DMSO        |
| 3 Experiment      | 13C         |
| 4 Number of Scans | 1024        |

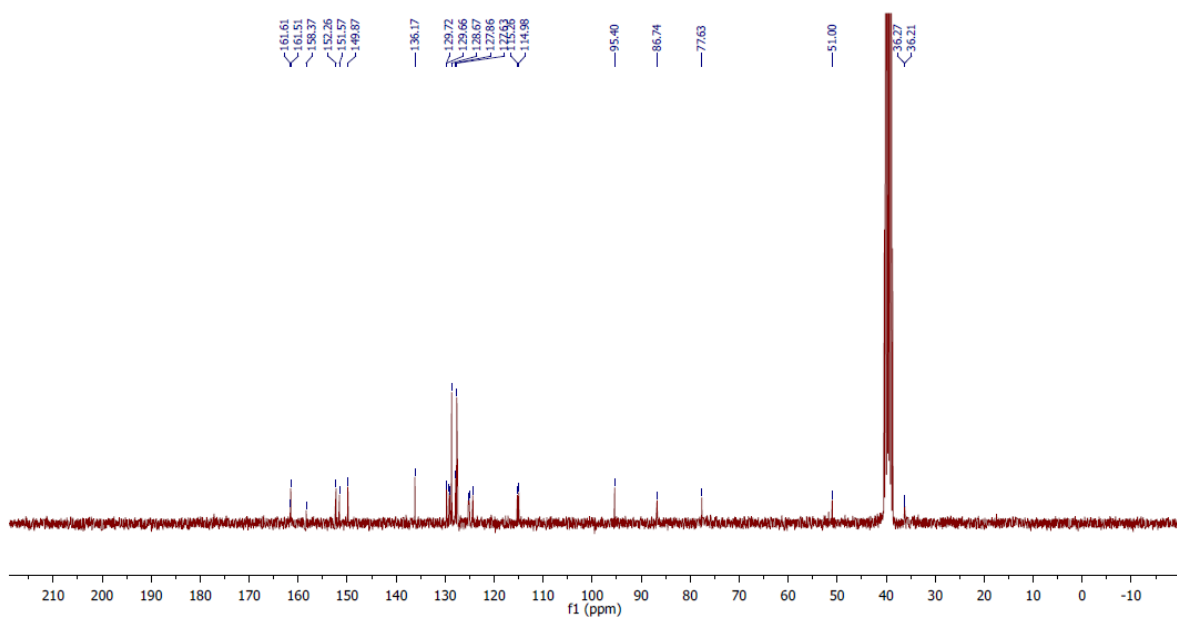

| Parameter         | Value       |
|-------------------|-------------|
| 1 Title           | Compound 9a |
| 2 Solvent         | DMSO        |
| 3 Experiment      | DEPT-135    |
| 4 Number of Scans | 256         |

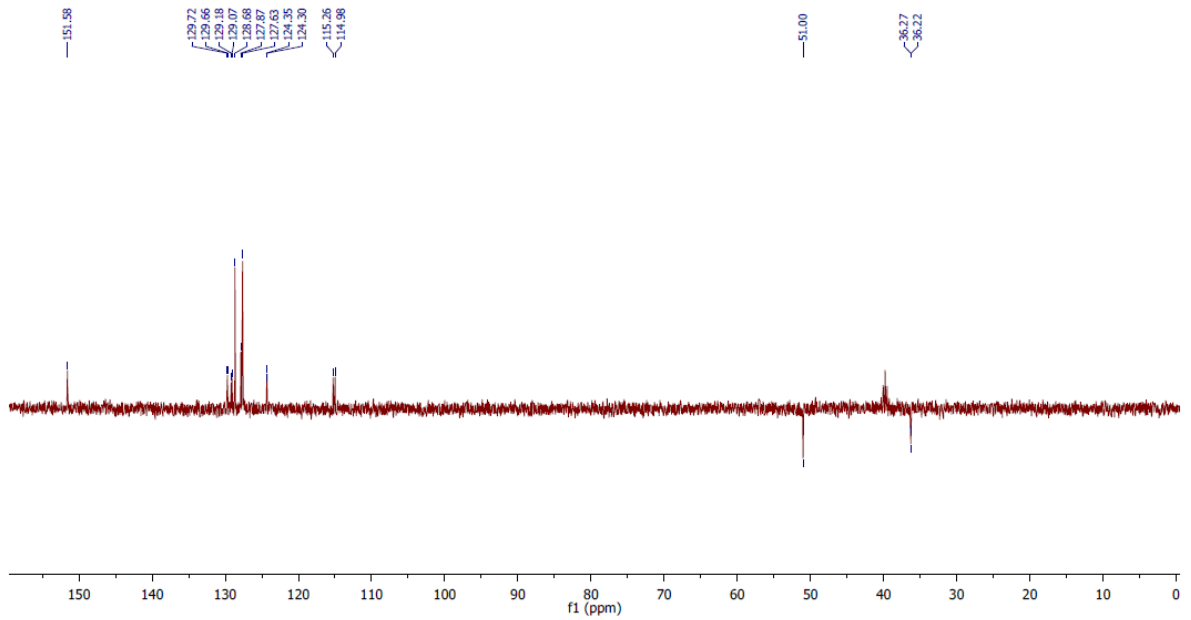

| Parameter         | Value       |
|-------------------|-------------|
| 1 Title           | Compound 9a |
| 2 Solvent         | DMSO        |
| 3 Experiment      | DEPT-90     |
| 4 Number of Scans | 256         |

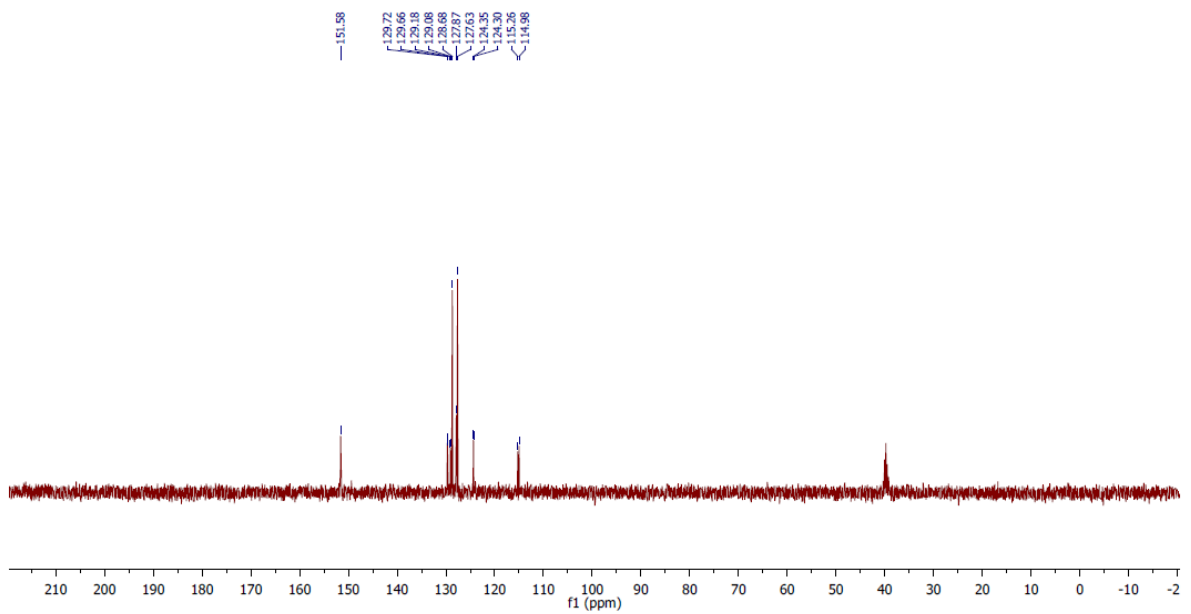

| Parameter         | Value       |
|-------------------|-------------|
| 1 Title           | Compound 9a |
| 2 Solvent         | DMSO        |
| 3 Experiment      | 19F         |
| 4 Number of Scans | 32          |

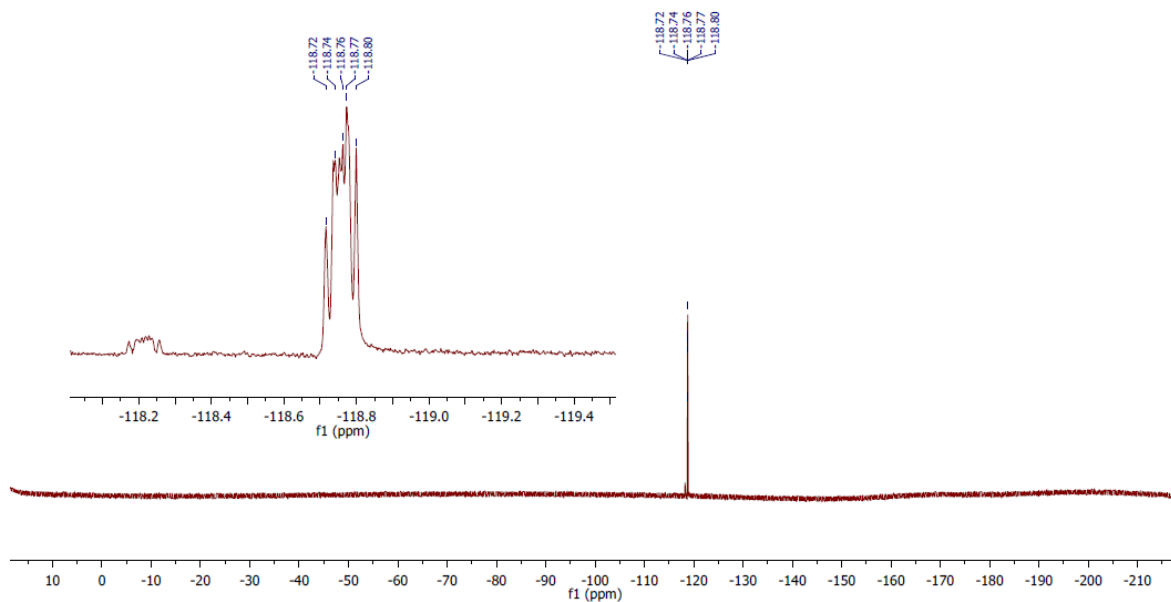

### 3-(1-Benzyl-2,4-dioxo-1,2,3,4-tetrahydropyrimidin-5-yl)-N-[(3-fluorophenyl)methyl]prop-2-ynamide (9b)

| Parameter         | Value       |
|-------------------|-------------|
| 1 Title           | Compound 9b |
| 2 Solvent         | DMSO        |
| 3 Experiment      | 1D          |
| 4 Number of Scans | 32          |

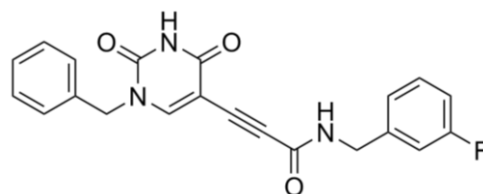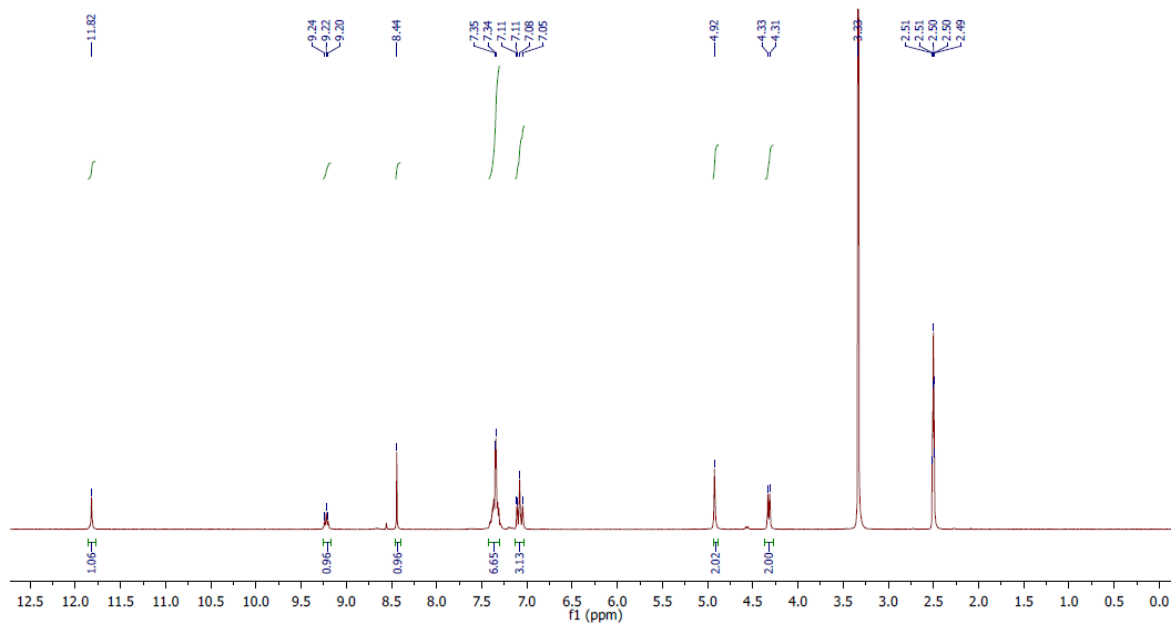

| Parameter         | Value       |
|-------------------|-------------|
| 1 Title           | Compound 9b |
| 2 Solvent         | DMSO        |
| 3 Experiment      | 13C         |
| 4 Number of Scans | 1024        |

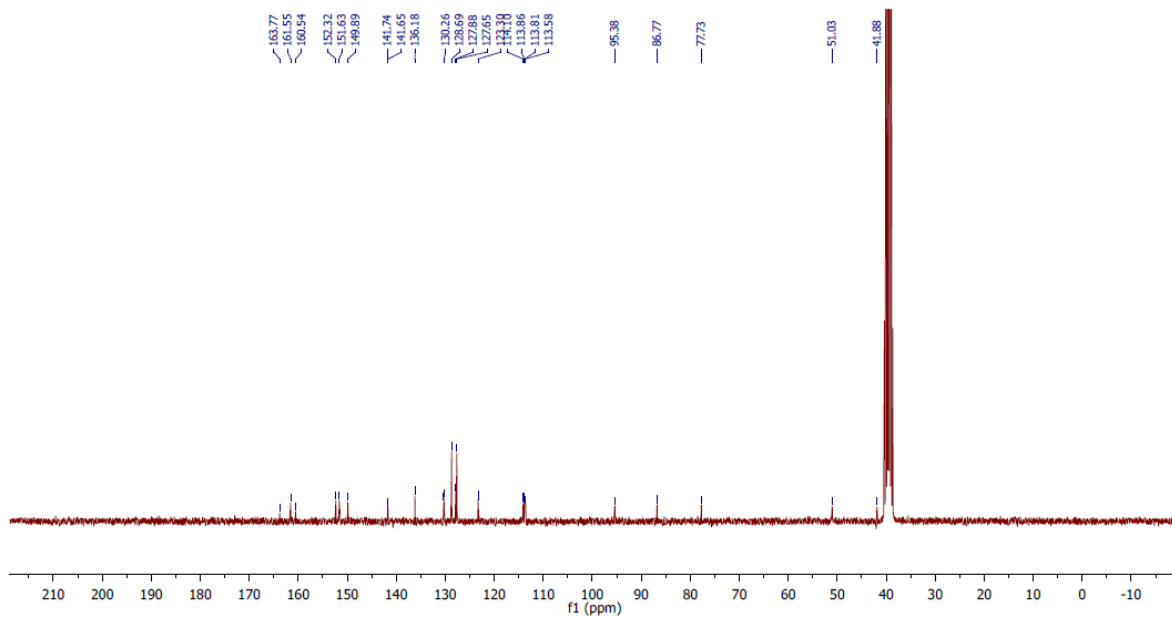

| Parameter         | Value       |
|-------------------|-------------|
| 1 Title           | Compound 9b |
| 2 Solvent         | DMSO        |
| 3 Experiment      | DEPT-135    |
| 4 Number of Scans | 256         |

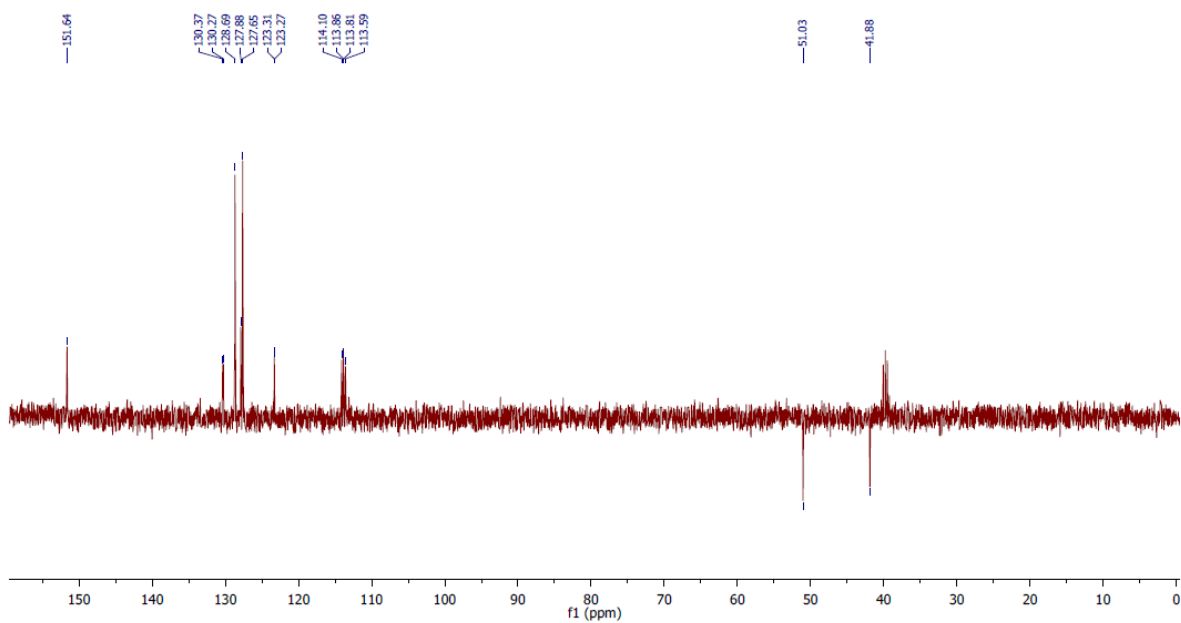



| Parameter         | Value       |
|-------------------|-------------|
| 1 Title           | Compound 9b |
| 2 Solvent         | DMSO        |
| 3 Experiment      | DEPT-90     |
| 4 Number of Scans | 256         |

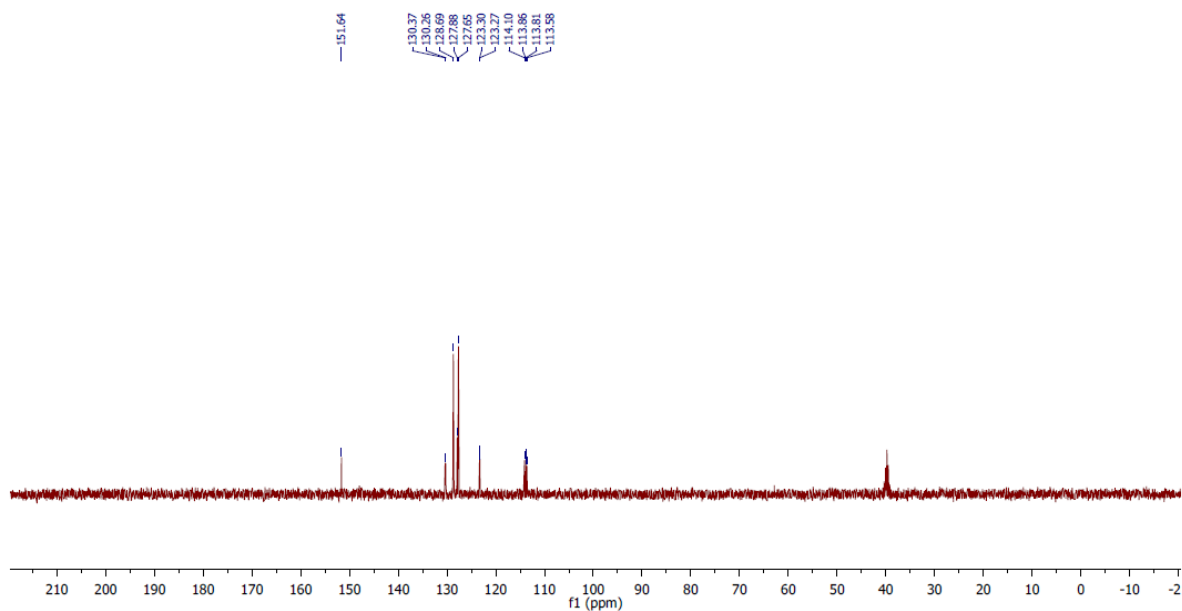

| Parameter         | Value       |
|-------------------|-------------|
| 1 Title           | Compound 9b |
| 2 Solvent         | DMSO        |
| 3 Experiment      | 19F         |
| 4 Number of Scans | 32          |

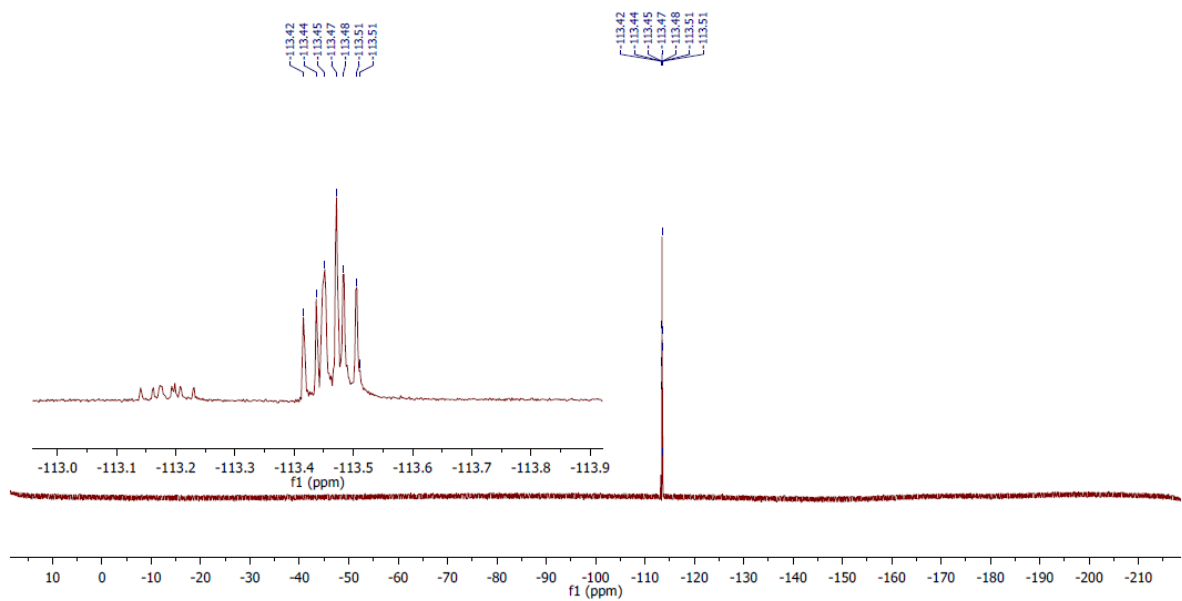

### 3-(1-Benzyl-2,4-dioxo-1,2,3,4-tetrahydropyrimidin-5-yl)-N-[(4-fluorophenyl)methyl]prop-2-ynamide (9c)

| Parameter         | Value       |
|-------------------|-------------|
| 1 Title           | Compound 9c |
| 2 Solvent         | DMSO        |
| 3 Experiment      | 1D          |
| 4 Number of Scans | 32          |

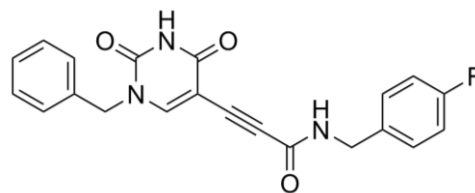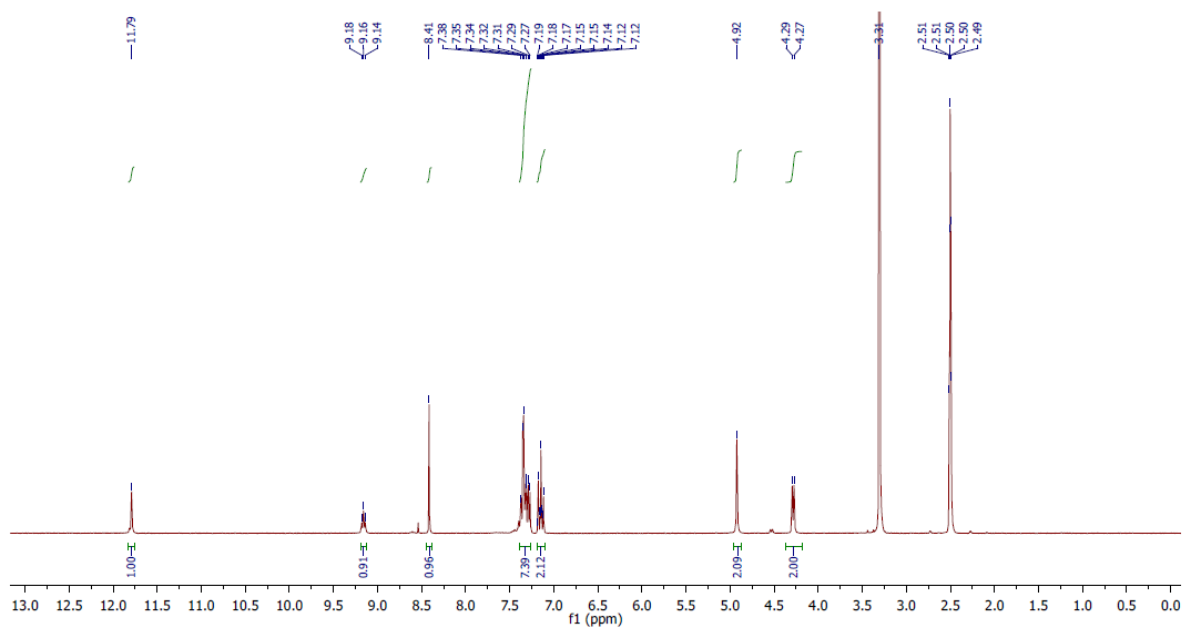

| Parameter         | Value       |
|-------------------|-------------|
| 1 Title           | Compound 9c |
| 2 Solvent         | DMSO        |
| 3 Experiment      | 13C         |
| 4 Number of Scans | 1024        |

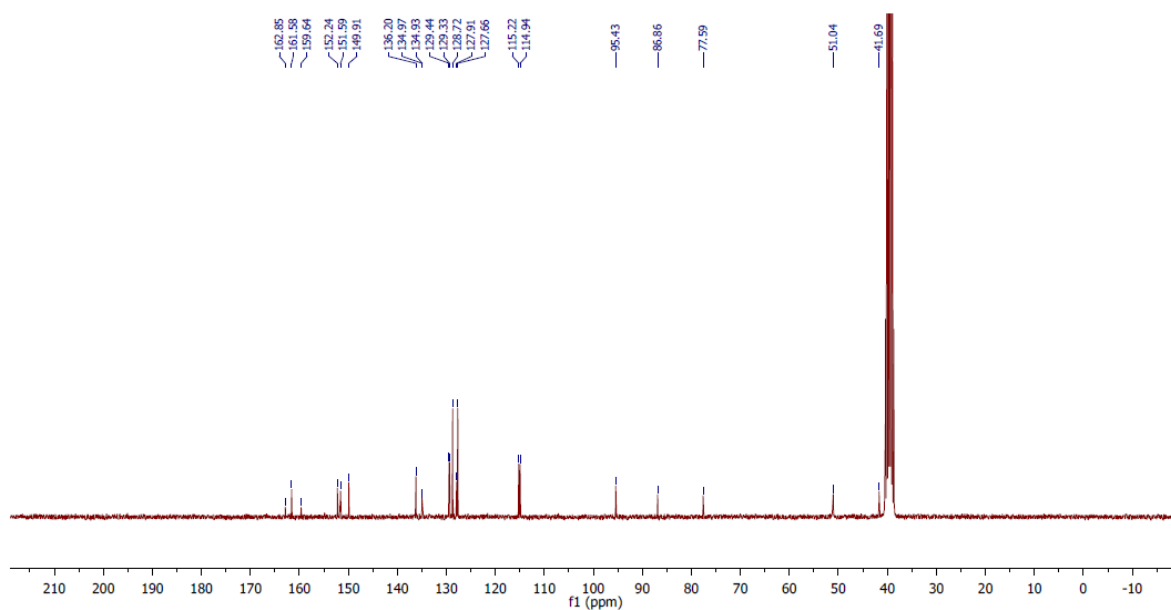

| Parameter         | Value       |
|-------------------|-------------|
| 1 Title           | Compound 9c |
| 2 Solvent         | DMSO        |
| 3 Experiment      | DEPT-135    |
| 4 Number of Scans | 256         |

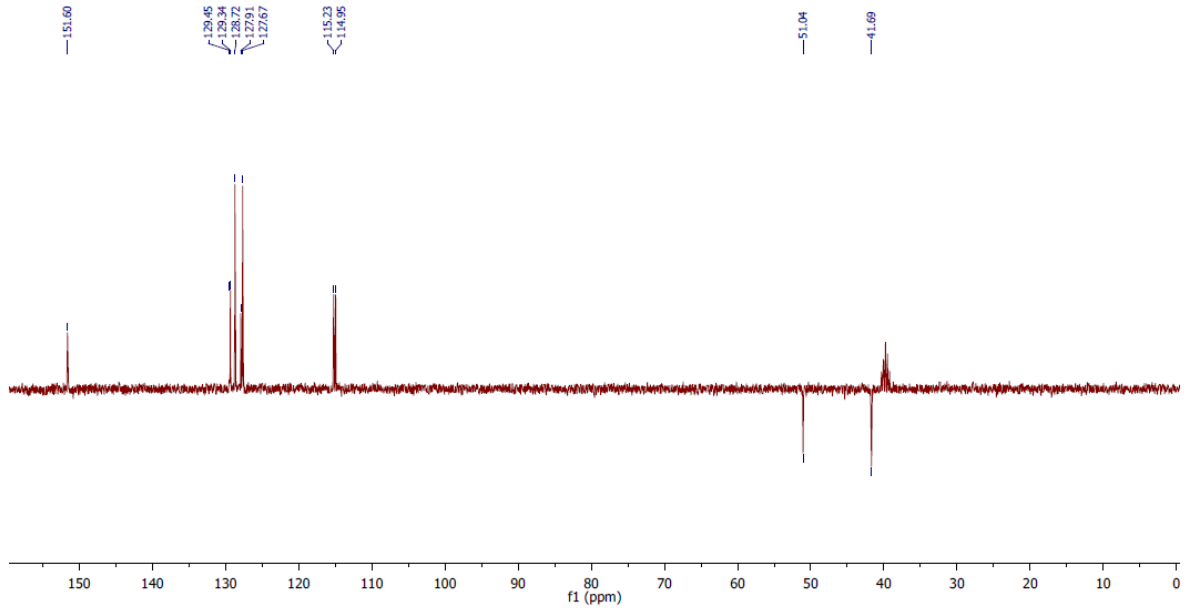

| Parameter         | Value       |
|-------------------|-------------|
| 1 Title           | Compound 9c |
| 2 Solvent         | DMSO        |
| 3 Experiment      | DEPT-90     |
| 4 Number of Scans | 256         |

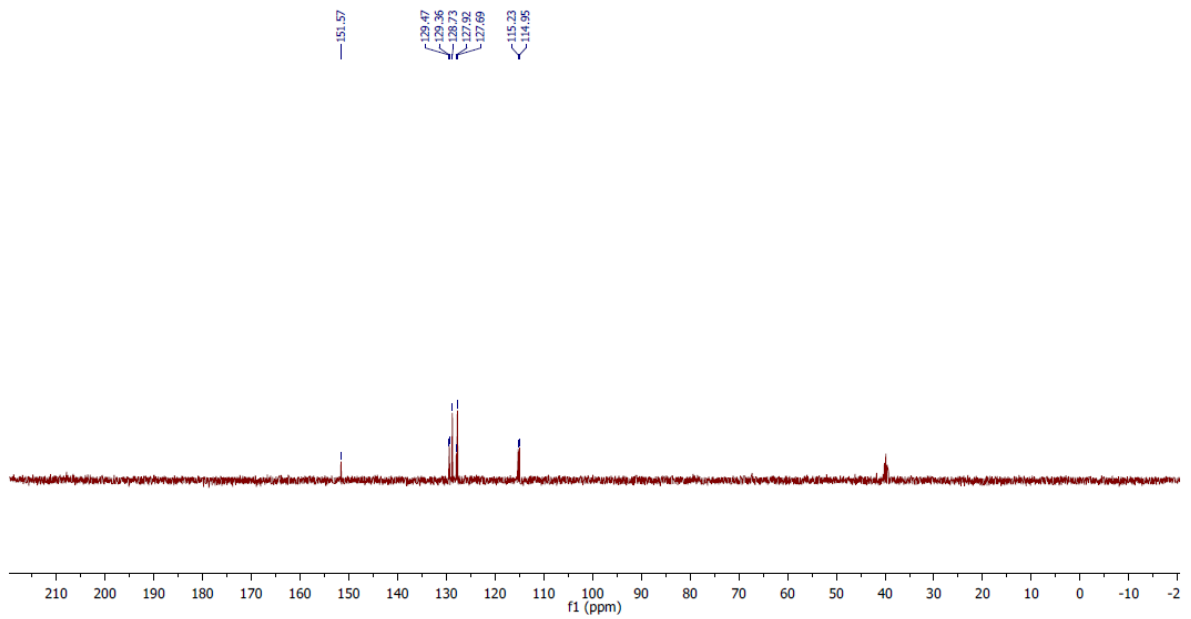

| Parameter         | Value       |
|-------------------|-------------|
| 1 Title           | Compound 9c |
| 2 Solvent         | DMSO        |
| 3 Experiment      | 19F         |
| 4 Number of Scans | 32          |

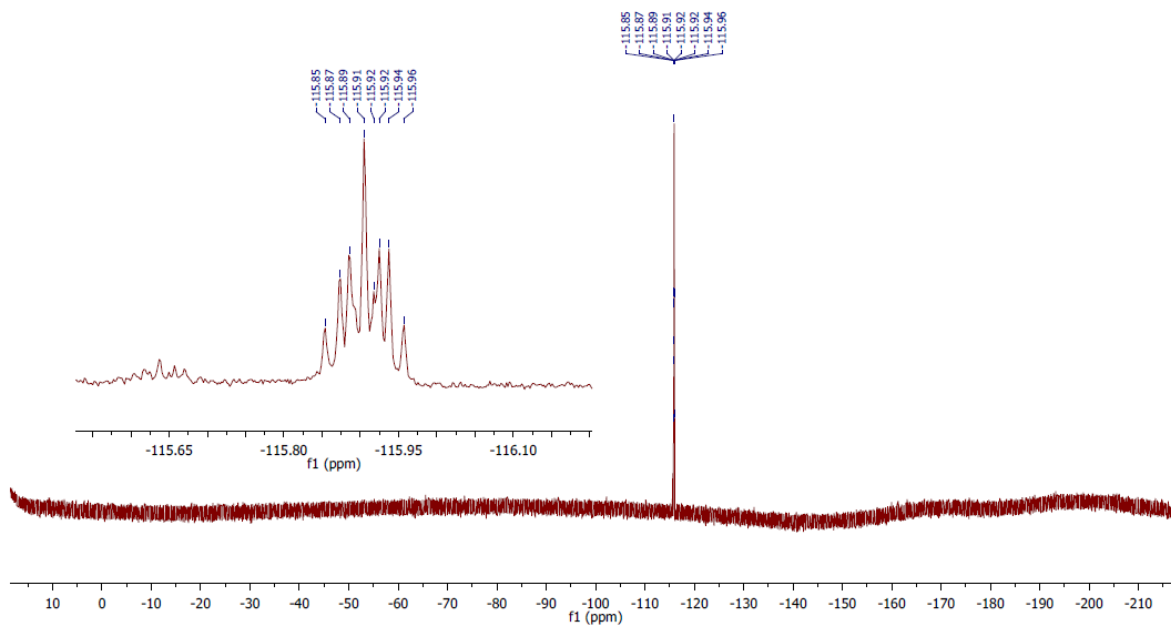

## ESI-TOF-HRMS

### 1-Benzyl-5-iodo-1,2,3,4-tetrahydropyrimidine-2,4-dione (5a)

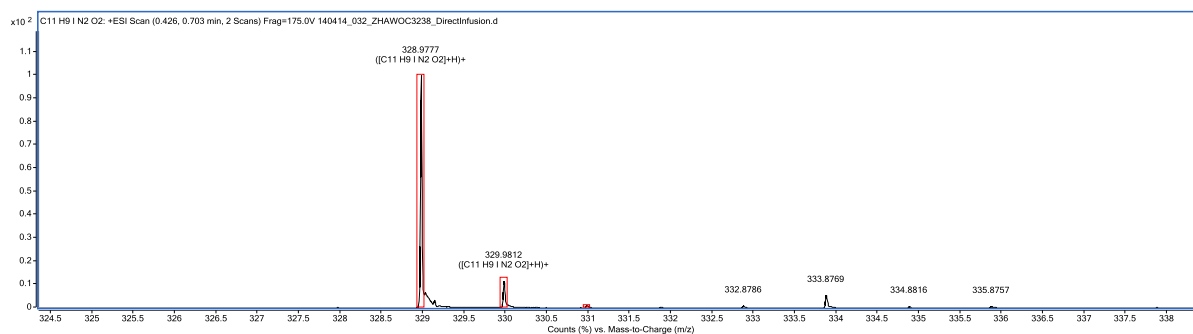

| Best | ID Source | Formula        | m/z      | Species | Mass     | Mass (MFG) | Score | Diff (ppm) |
|------|-----------|----------------|----------|---------|----------|------------|-------|------------|
| TRUE | MFG       | C11 H9 I N2 O2 | 328.9777 | (M+H)+  | 327.9705 | 327.9709   | 98.84 | 1.1        |

### 4-[(5-Iodo-2,4-dioxo-1,2,3,4-tetrahydropyrimidin-1-yl)methyl]benzoic acid (5b)

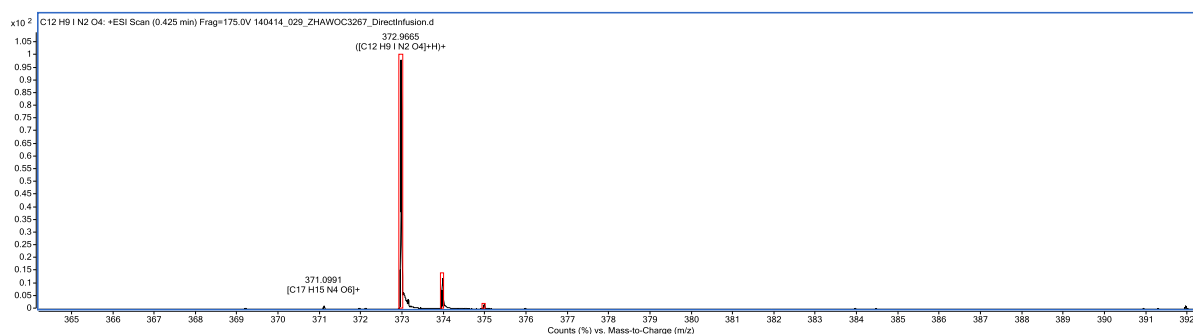

| Best | ID Source | Formula        | m/z      | Species | Mass     | Mass (MFG) | Score | Diff (ppm) |
|------|-----------|----------------|----------|---------|----------|------------|-------|------------|
| TRUE | MFG       | C12 H9 I N2 O4 | 372.9665 | (M+H)+  | 371.9593 | 371.9607   | 93.31 | 3.7        |

### Methyl 4-[3-(aminomethyl)phenoxy]butanoate (7f)

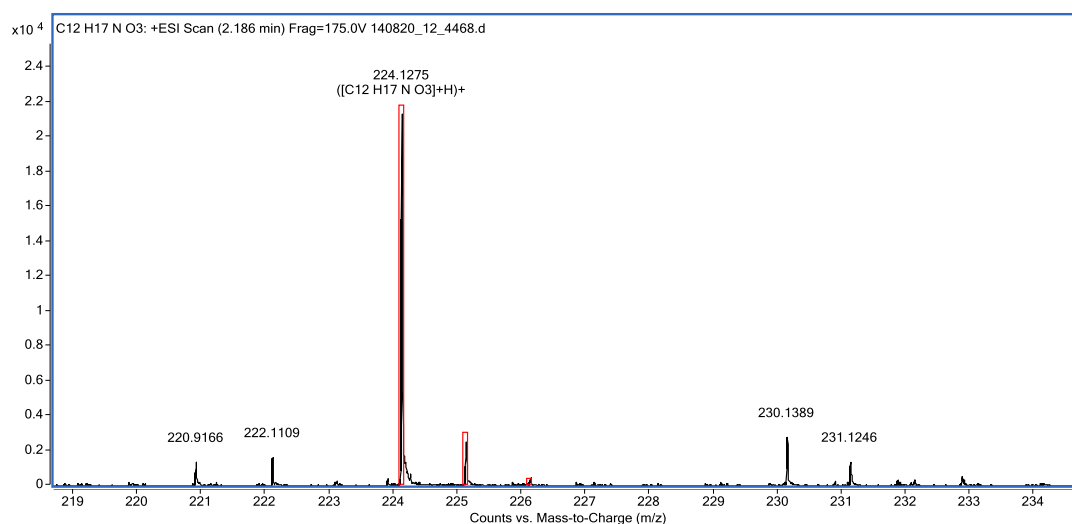

| Best | ID Source | Formula      | m/z      | Species | Mass     | Mass (MFG) | Score | Diff (ppm) |
|------|-----------|--------------|----------|---------|----------|------------|-------|------------|
| TRUE | MFG       | C12 H17 N O3 | 224.1275 | (M+H)+  | 223.1203 | 223.1208   | 96.25 | 2.65       |

### N-Benzylprop-2-ynamide (8a)

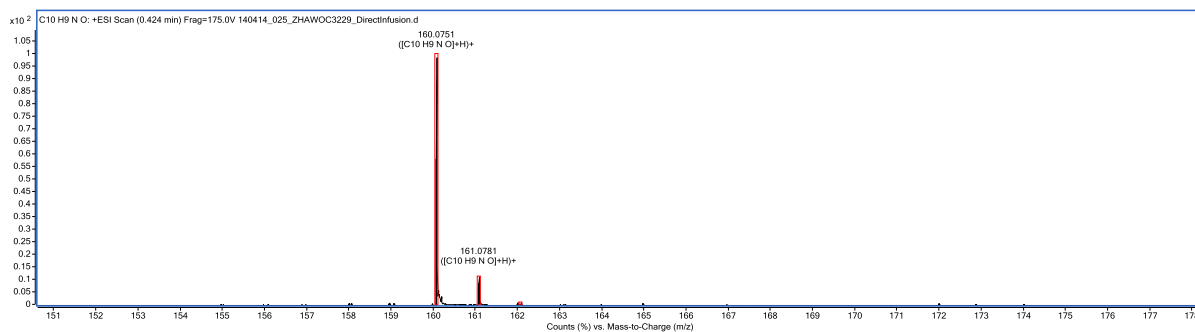

| Best | ID Source | Formula | m/z      | Species | Mass     | Mass (MFG) | Score | Diff (ppm) |
|------|-----------|---------|----------|---------|----------|------------|-------|------------|
| TRUE | MFG       | C10H9NO | 160.0751 | (M+H)+  | 159.0678 | 159.0684   | 97.82 | 3.82       |

### N-[(2-Fluorophenyl)methyl]prop-2-ynamide (8)

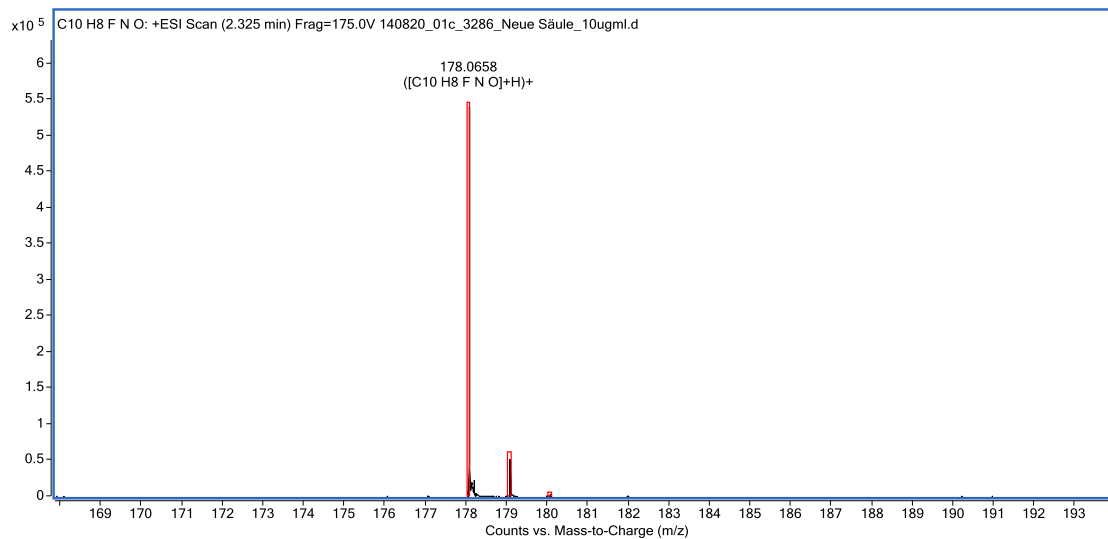

| Best | ID Source | Formula  | m/z      | Species | Mass     | Mass (MFG) | Score | Diff (ppm) |
|------|-----------|----------|----------|---------|----------|------------|-------|------------|
| TRUE | MFG       | C10H8FNO | 178.0658 | (M+H)+  | 177.0586 | 177.0590   | 98.27 | 2.43       |

### ***N*-[(3-Fluorophenyl)methyl]prop-2-ynamide (8c)**

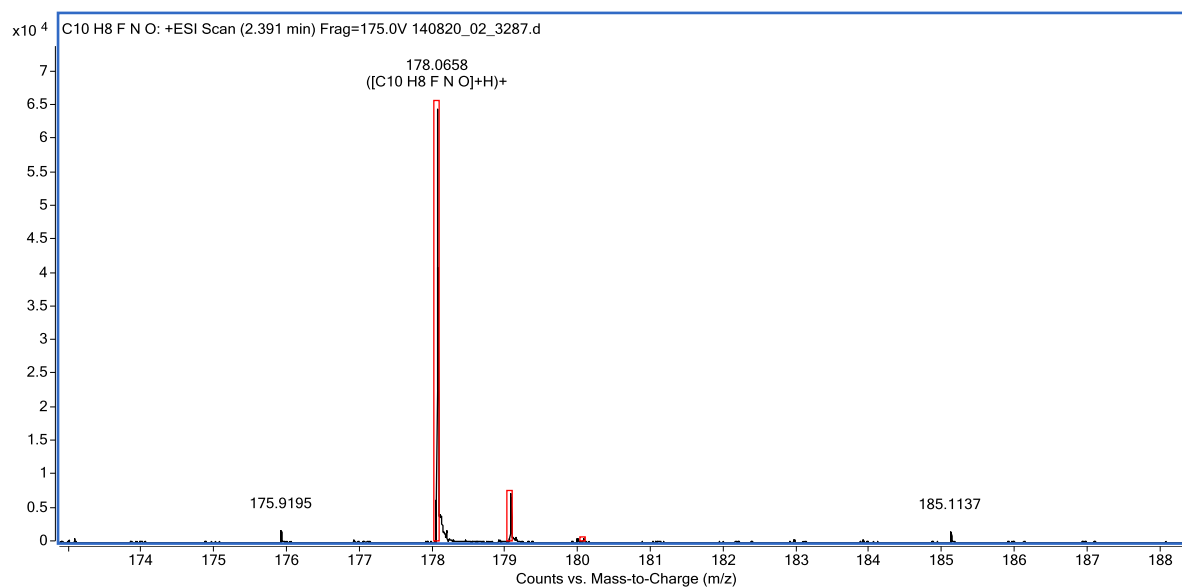

| Best | ID Source | Formula                            | m/z      | Species            | Mass     | Mass (MFG) | Score | Diff (ppm) |
|------|-----------|------------------------------------|----------|--------------------|----------|------------|-------|------------|
| TRUE | MFG       | C <sub>10</sub> H <sub>8</sub> FNO | 178.0658 | (M+H) <sup>+</sup> | 177.0586 | 177.0590   | 97.07 | 2.11       |

### ***N*-[(4-Fluorophenyl)methyl]prop-2-ynamide (8d)**

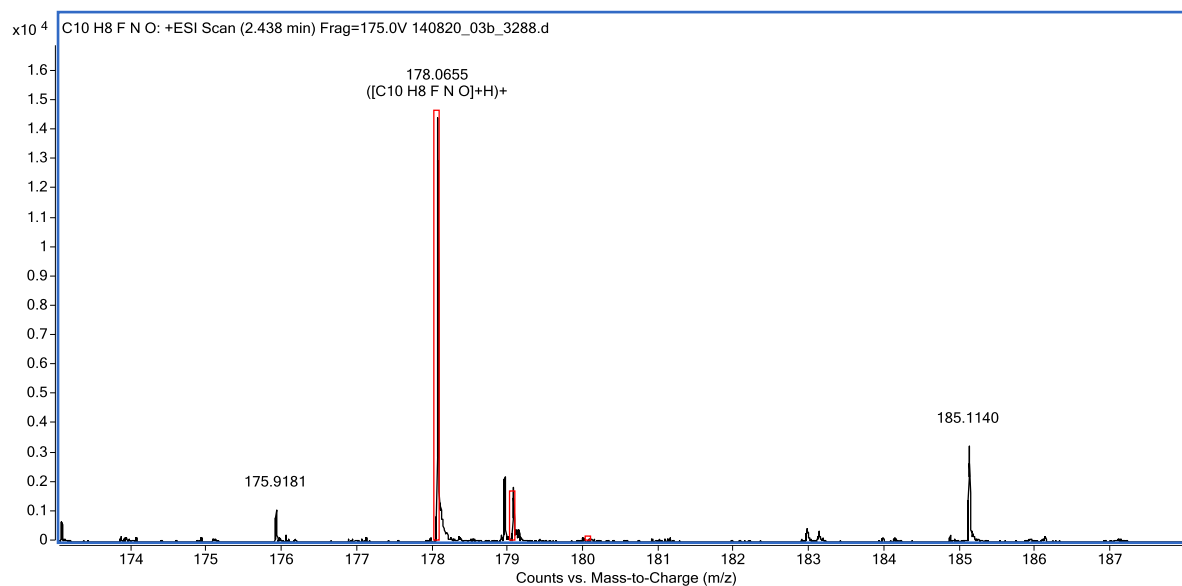

| Best | ID Source | Formula                            | m/z      | Species            | Mass     | Mass (MFG) | Score | Diff (ppm) |
|------|-----------|------------------------------------|----------|--------------------|----------|------------|-------|------------|
| TRUE | MFG       | C <sub>10</sub> H <sub>8</sub> FNO | 178.0655 | (M+H) <sup>+</sup> | 177.0583 | 177.0590   | 96.29 | 3.93       |

### N-[(3-Methoxyphenyl)methyl]prop-2-ynamide (8e)

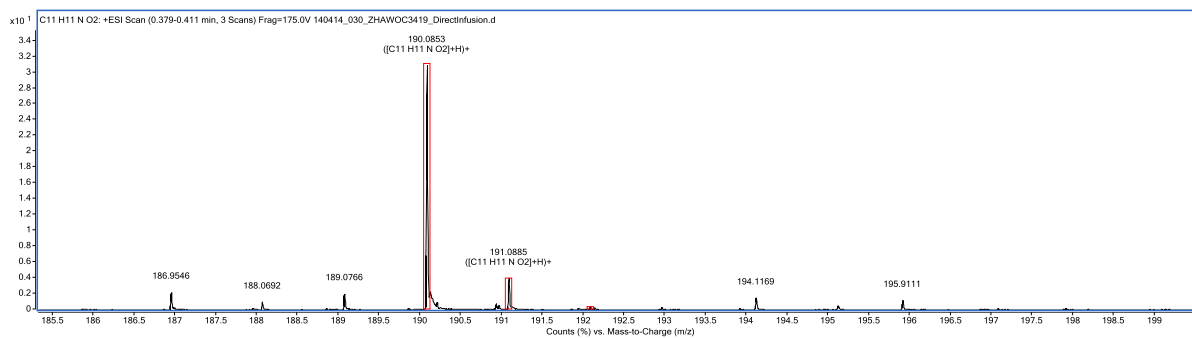

| Best | ID Source | Formula      | m/z      | Species | Mass     | Mass (MFG) | Score | Diff (ppm) |
|------|-----------|--------------|----------|---------|----------|------------|-------|------------|
| TRUE | MFG       | C11 H11 N O2 | 190.0853 | (M+H)+  | 189.0780 | 189.0790   | 95.56 | 5.02       |

### Methyl 4-[3-(prop-2-ynamidomethyl)phenoxy]butanoate (8f)

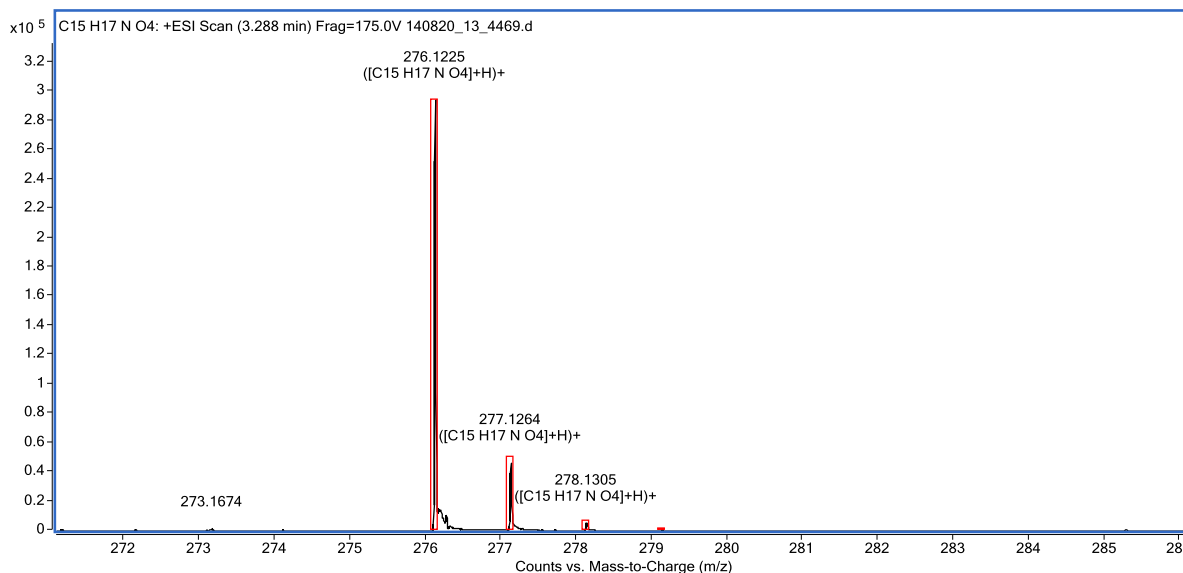

| Best | ID Source | Formula      | m/z      | Species | Mass     | Mass (MFG) | Score | Diff (ppm) |
|------|-----------|--------------|----------|---------|----------|------------|-------|------------|
| TRUE | MFG       | C15 H17 N O4 | 276.1225 | (M+H)+  | 275.1153 | 275.1158   | 98.18 | 1.59       |



#### 4-[3-(Prop-2-ynamidomethyl)phenoxy]butanoic acid (8f)

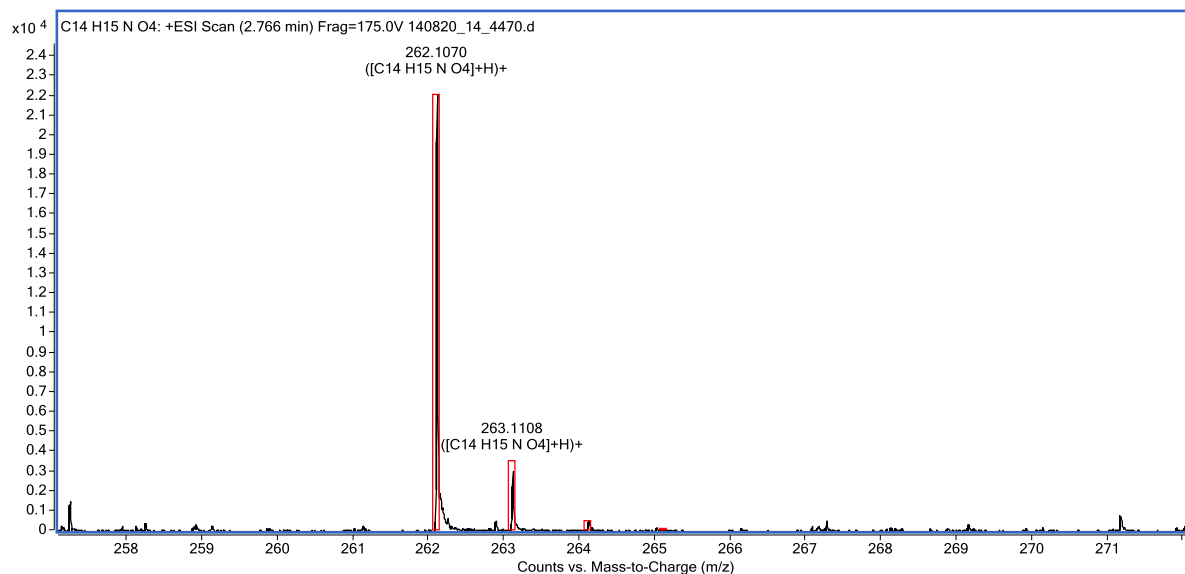

| Best | ID Source | Formula      | m/z      | Species | Mass     | Mass (MFG) | Score | Diff (ppm) |
|------|-----------|--------------|----------|---------|----------|------------|-------|------------|
| TRUE | MFG       | C14 H15 N O4 | 262.1070 | (M+H)+  | 261.0998 | 261.1001   | 97.48 | 1.09       |

#### N-Benzyl-3-(1-benzyl-2,4-dioxo-1,2,3,4-tetrahydropyrimidin-5-yl)prop-2-ynamide (2)

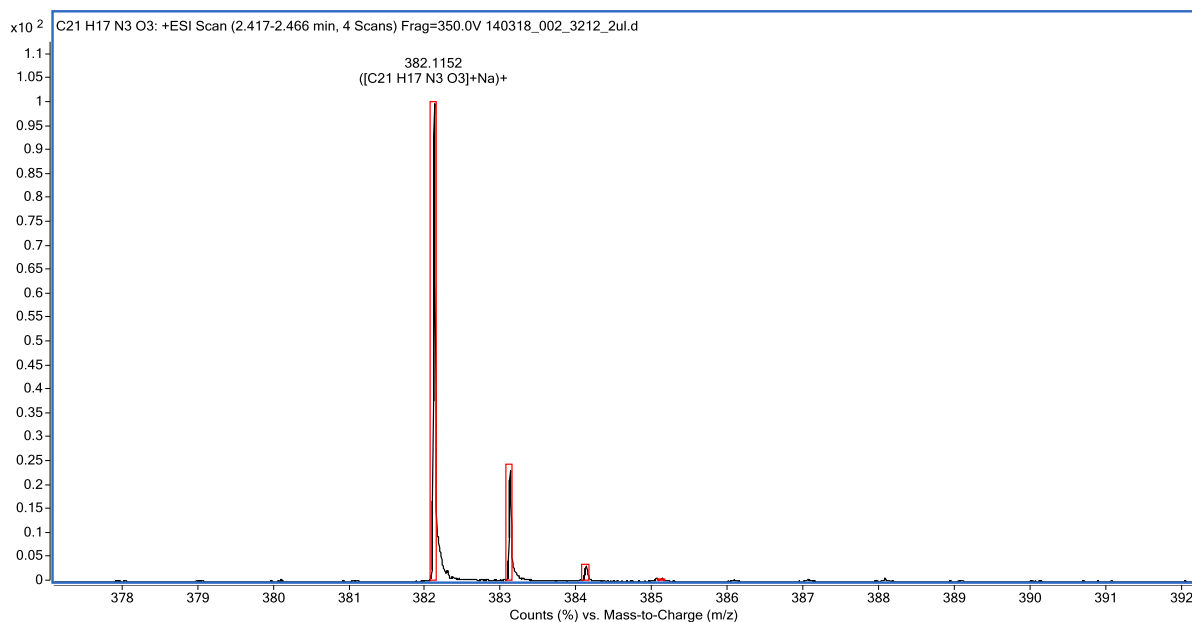

| Best | ID Source | Formula       | m/z      | Species | Mass     | Mass (MFG) | Score | Diff (ppm) |
|------|-----------|---------------|----------|---------|----------|------------|-------|------------|
| TRUE | MFG       | C21 H17 N3 O3 | 382.1152 | (M+Na)+ | 359.1259 | 359.1270   | 96.22 | 3.13       |

**4-([5-(2-((3-methoxyphenyl)methyl)carbamoyl)eth-1-yn-1-yl)-2,4-dioxo-1,2,3,4-tetrahydropyrimidin-1-yl)methyl)benzoic acid (3)**

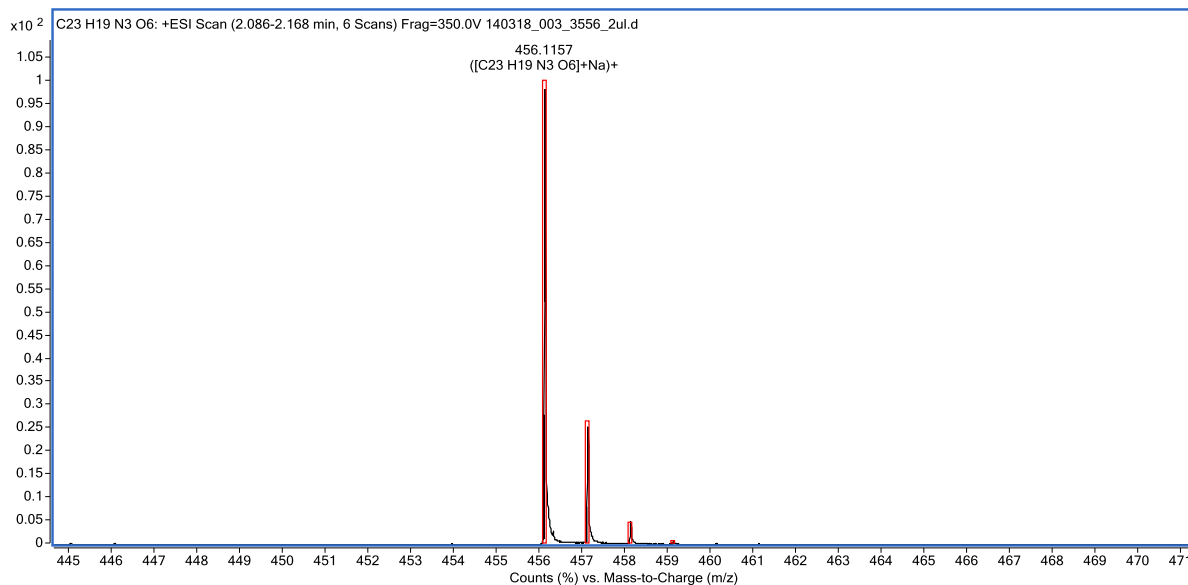

| Best | ID Source | Formula       | m/z      | Species | Mass     | Mass (MFG) | Score | Diff (ppm) |
|------|-----------|---------------|----------|---------|----------|------------|-------|------------|
| TRUE | MFG       | C23 H19 N3 O6 | 456.1157 | (M+Na)+ | 433.1264 | 433.1274   | 97.53 | 2.23       |

**4-([5-[2-([3-(3-Carboxypropoxy)phenyl)methyl]carbamoyl)eth-1-yn-1-yl]-2,4-dioxo-1,2,3,4-tetrahydropyrimidin-1-yl)methyl)benzoic acid (4)**

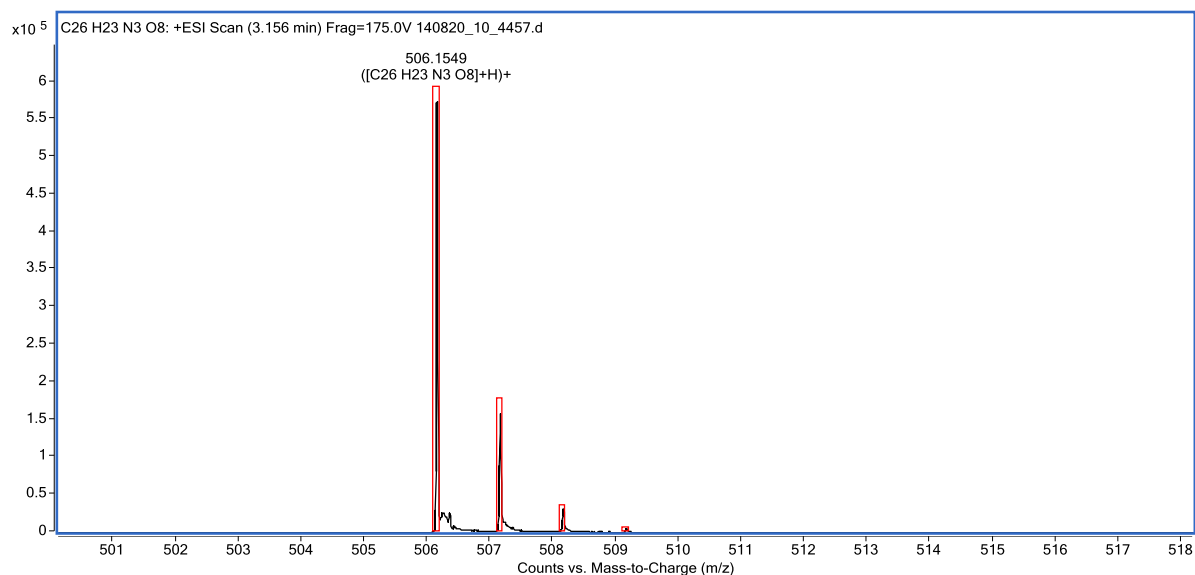

| Best | ID Source | Formula       | m/z      | Species | Mass     | Mass (MFG) | Score | Diff (ppm) |
|------|-----------|---------------|----------|---------|----------|------------|-------|------------|
| TRUE | MFG       | C26 H23 N3 O8 | 506.1549 | (M+H)+  | 505.1475 | 505.1485   | 96.51 | 1.95       |

**3-(1-Benzyl-2,4-dioxo-1,2,3,4-tetrahydropyrimidin-5-yl)-N-[(2-fluorophenyl)methyl]prop-2-ynamide (9a)**

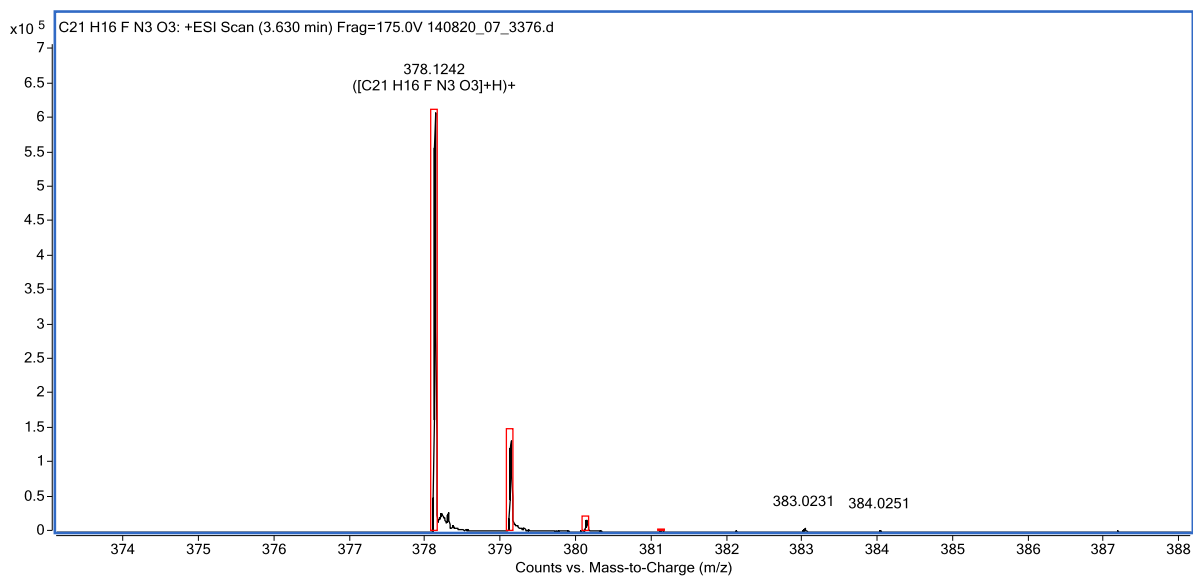

| Best | ID Source | Formula         | m/z      | Species | Mass     | Mass (MFG) | Score | Diff (ppm) |
|------|-----------|-----------------|----------|---------|----------|------------|-------|------------|
| TRUE | MFG       | C21 H16 F N3 O3 | 378.1242 | (M+H)+  | 377.1168 | 377.1176   | 97.39 | 1.92       |

**3-(1-Benzyl-2,4-dioxo-1,2,3,4-tetrahydropyrimidin-5-yl)-N-[(3-fluorophenyl)methyl]prop-2-ynamide (9b)**

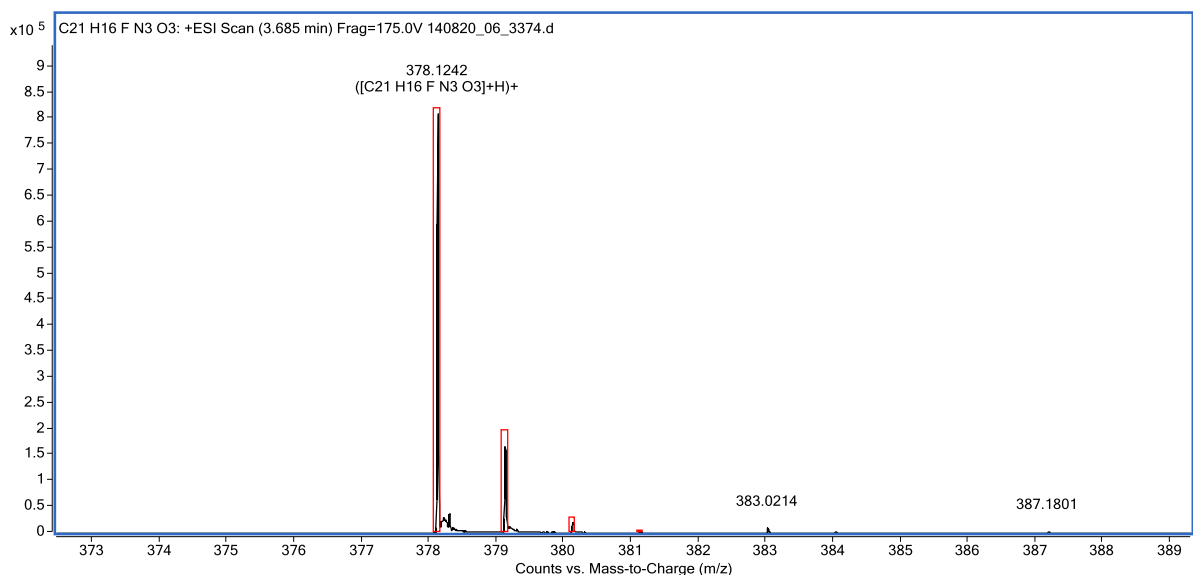

| Best | ID Source | Formula         | m/z      | Species | Mass     | Mass (MFG) | Score | Diff (ppm) |
|------|-----------|-----------------|----------|---------|----------|------------|-------|------------|
| TRUE | MFG       | C21 H16 F N3 O3 | 378.1242 | (M+H)+  | 377.1168 | 377.1176   | 96.18 | 1.92       |

**3-(1-Benzyl-2,4-dioxo-1,2,3,4-tetrahydropyrimidin-5-yl)-N-[(4-fluorophenyl)methyl]prop-2-ynamide (9c)**

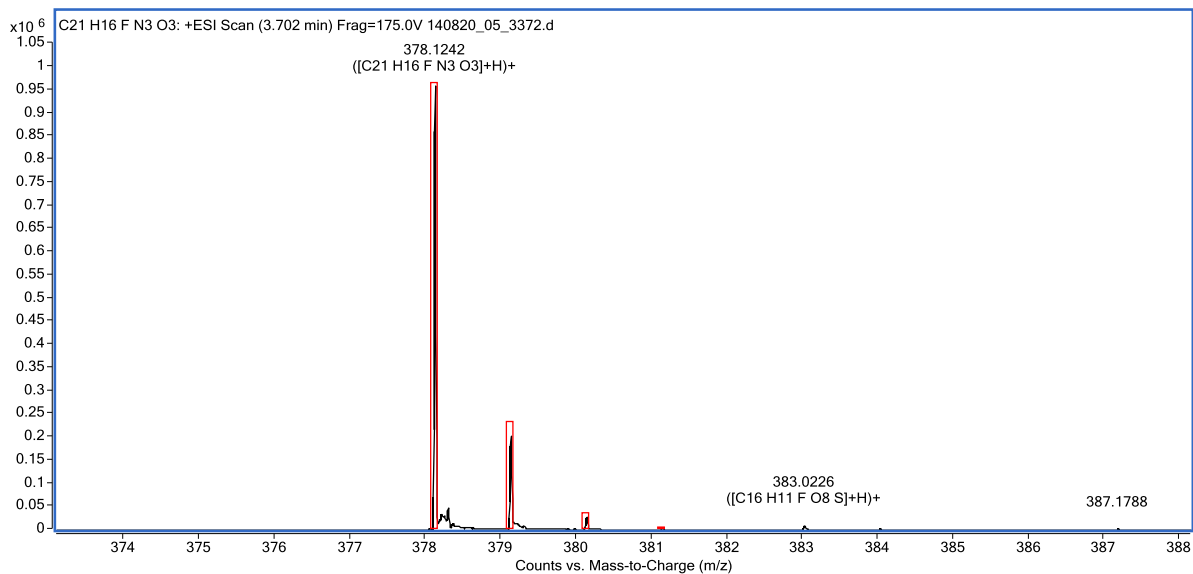

| Best | ID Source | Formula         | m/z      | Species | Mass     | Mass (MFG) | Score | Diff (ppm) |
|------|-----------|-----------------|----------|---------|----------|------------|-------|------------|
| TRUE | MFG       | C21 H16 F N3 O3 | 378.1242 | (M+H)+  | 377.1168 | 377.1176   | 96.45 | 1.95       |

## IR spectra

### 1-Benzyl-5-iodo-1,2,3,4-tetrahydropyrimidine-2,4-dione (5a)

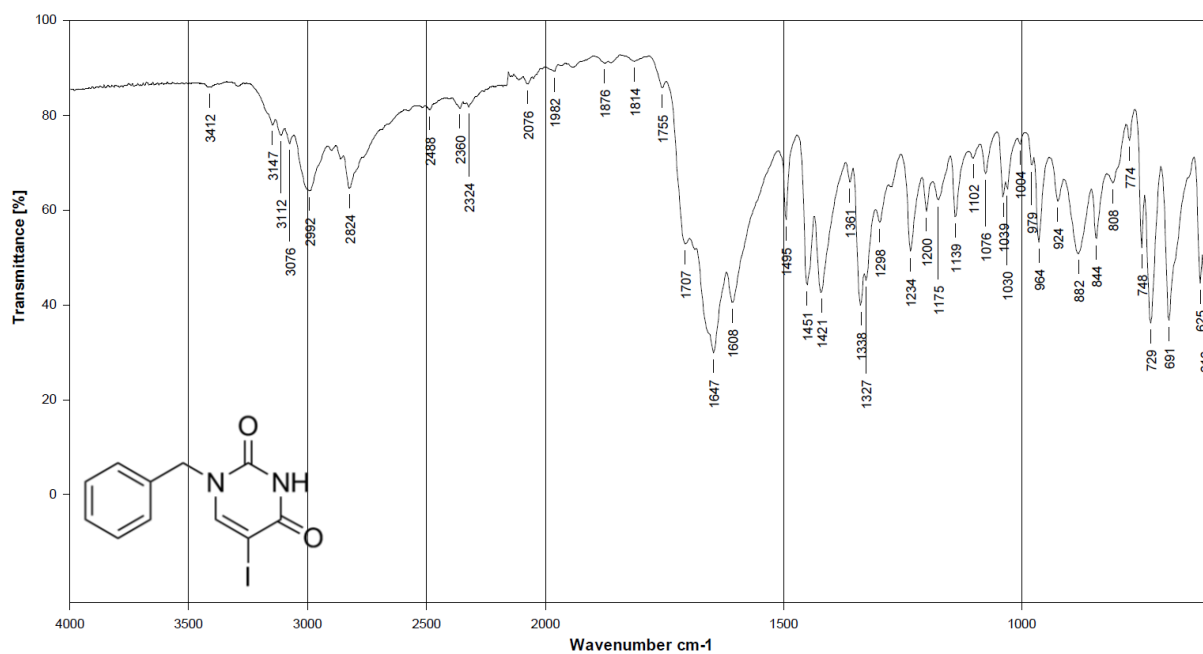

### 4-[(5-Iodo-2,4-dioxo-1,2,3,4-tetrahydropyrimidin-1-yl)methyl]benzoic acid (5b)

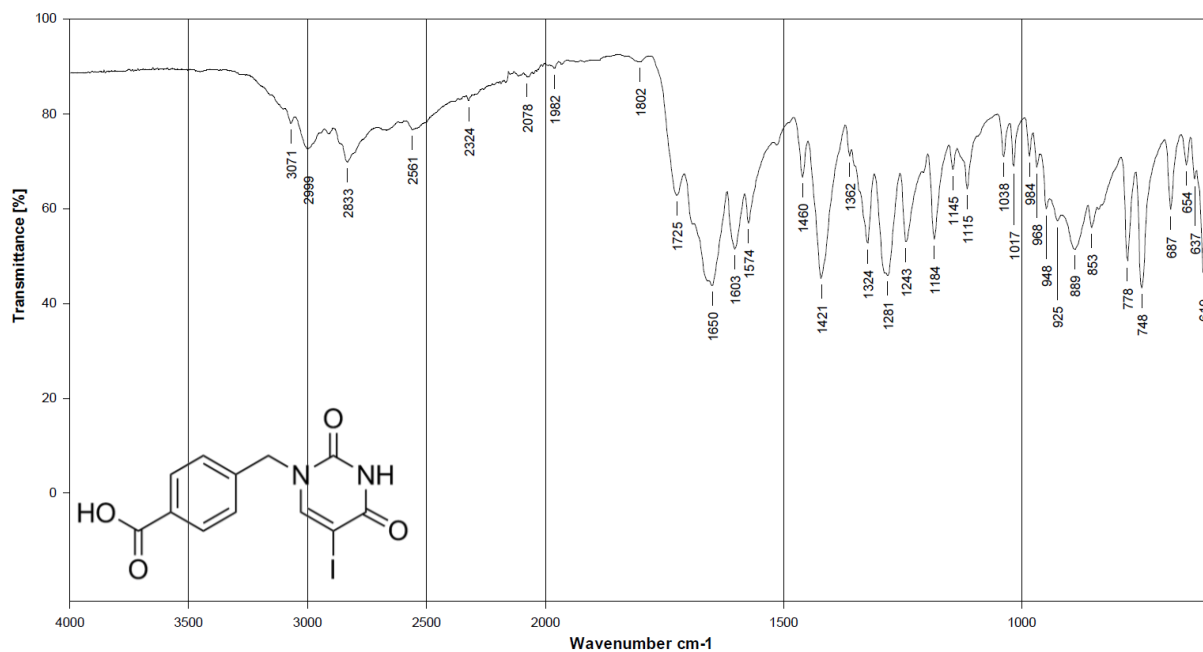

### Methyl 4-(3-cyanophenoxy)butanoate (6)

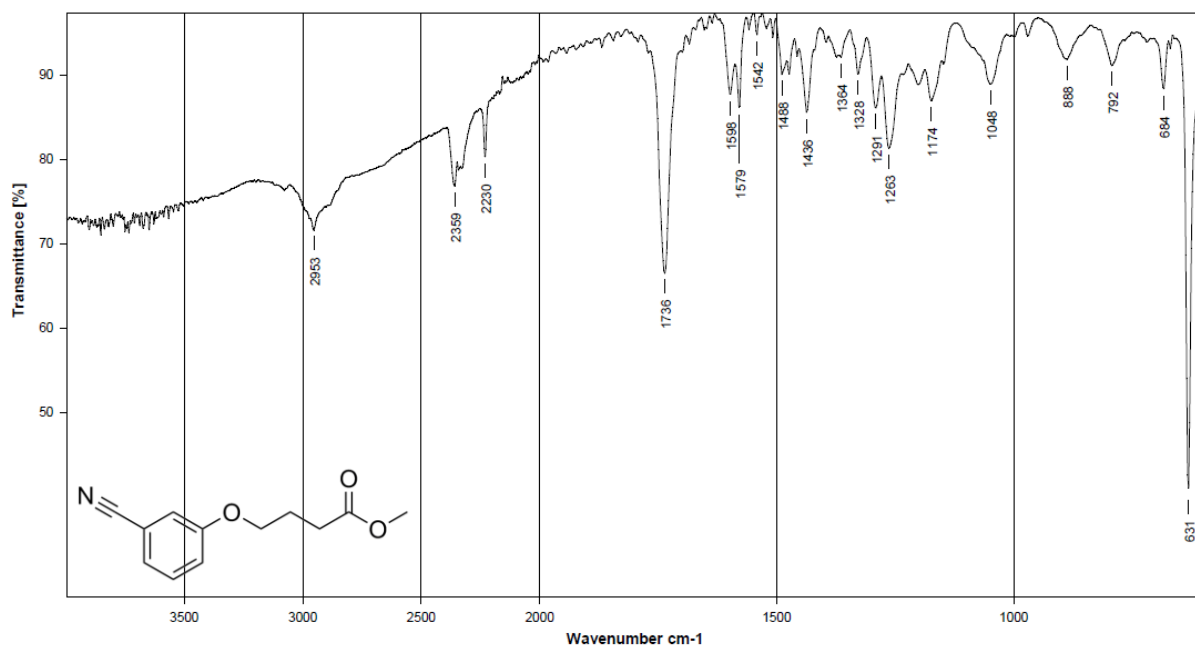

### N-Benzylprop-2-ynamide (8a)

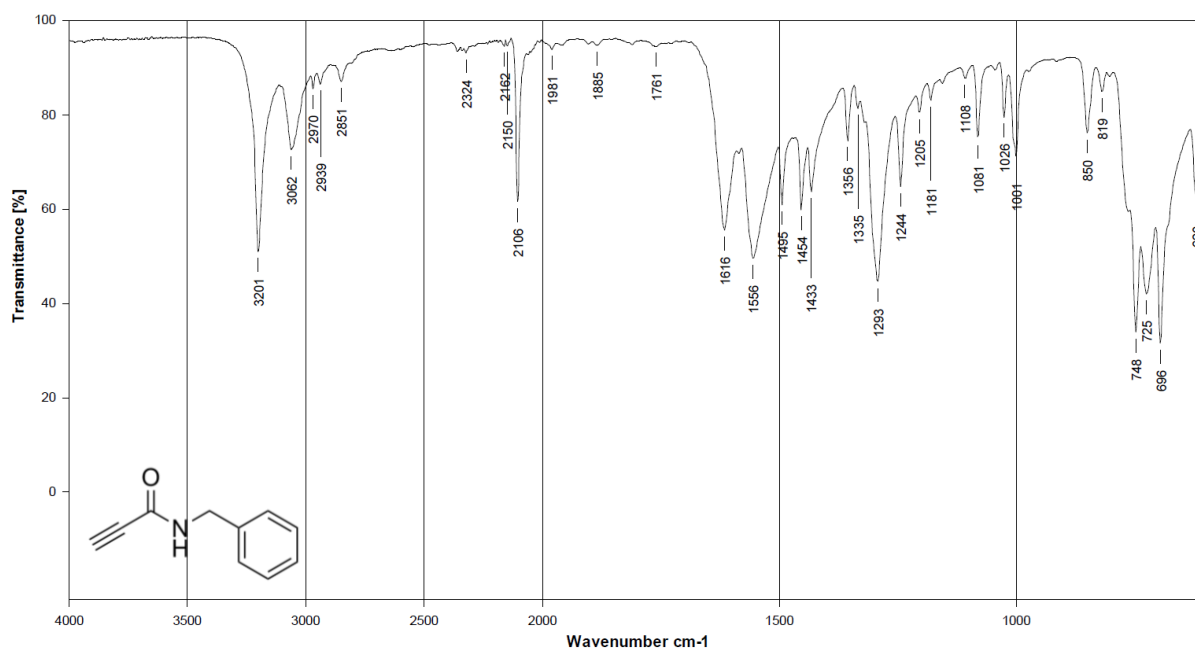

### ***N*-[(2-Fluorophenyl)methyl]prop-2-ynamide (8b)**

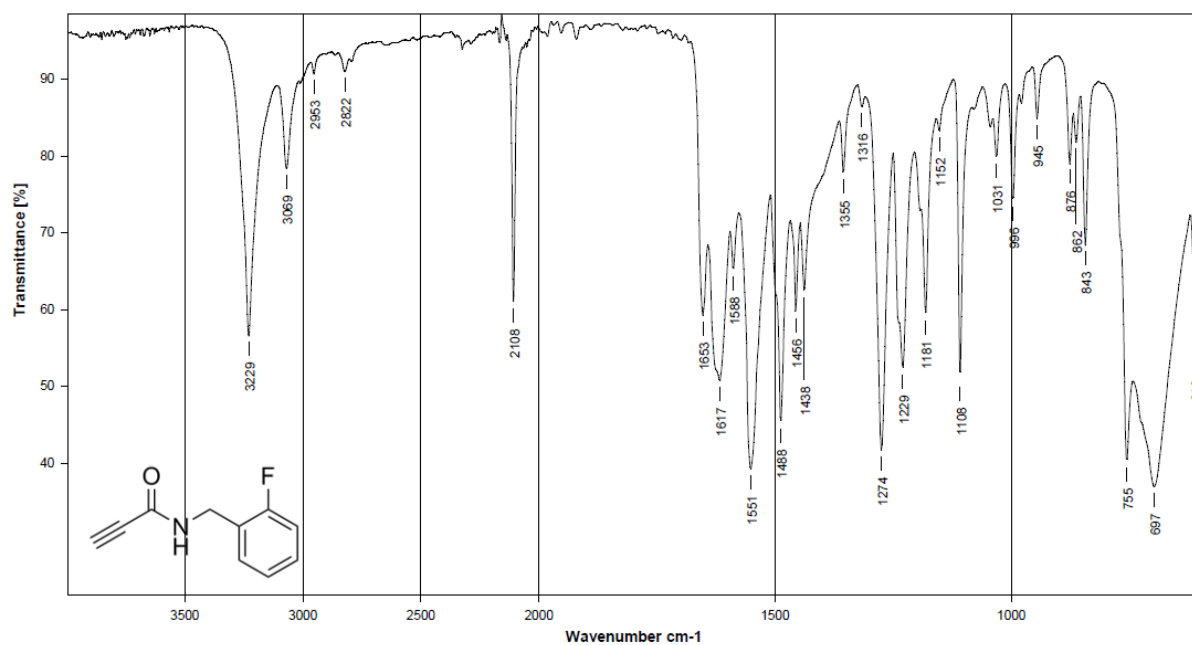

### ***N*-[(3-Fluorophenyl)methyl]prop-2-ynamide (8c)**

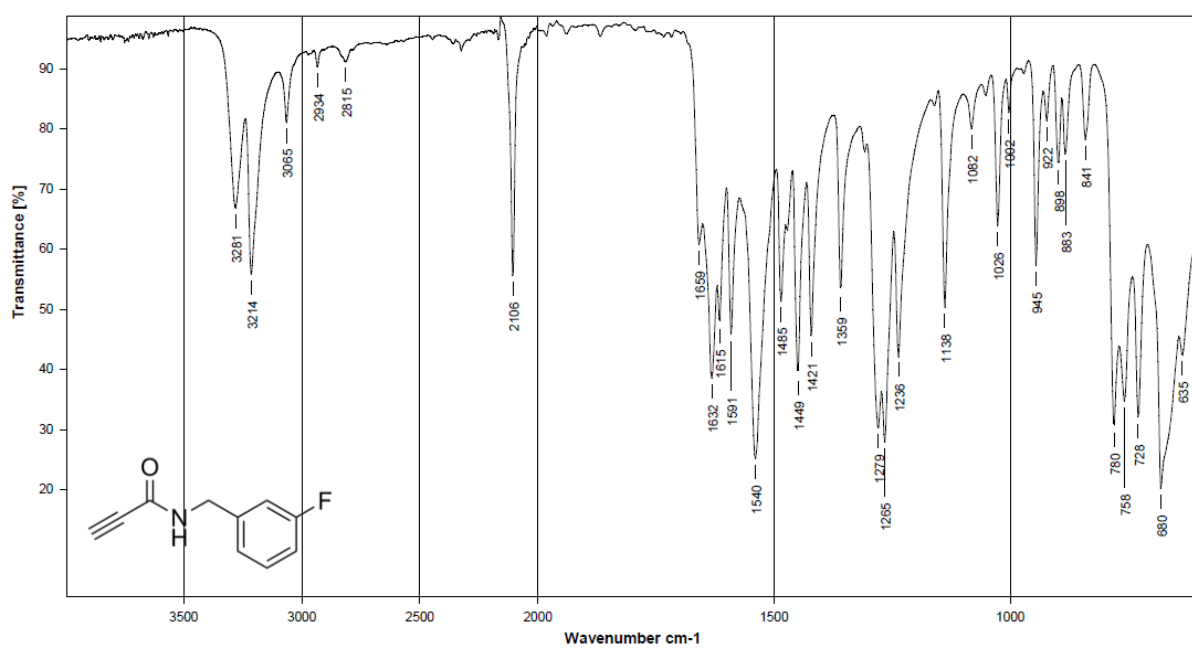

### ***N*-[(4-Fluorophenyl)methyl]prop-2-ynamide (8d)**

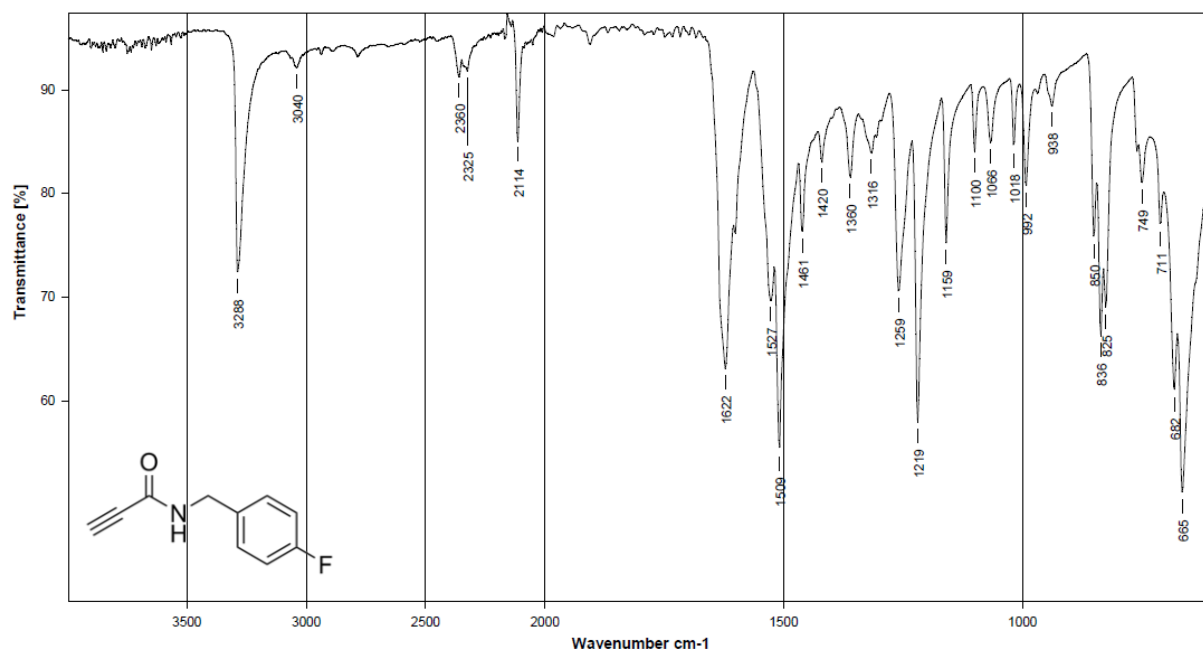

### ***N*-[(3-Methoxyphenyl)methyl]prop-2-ynamide (8e)**

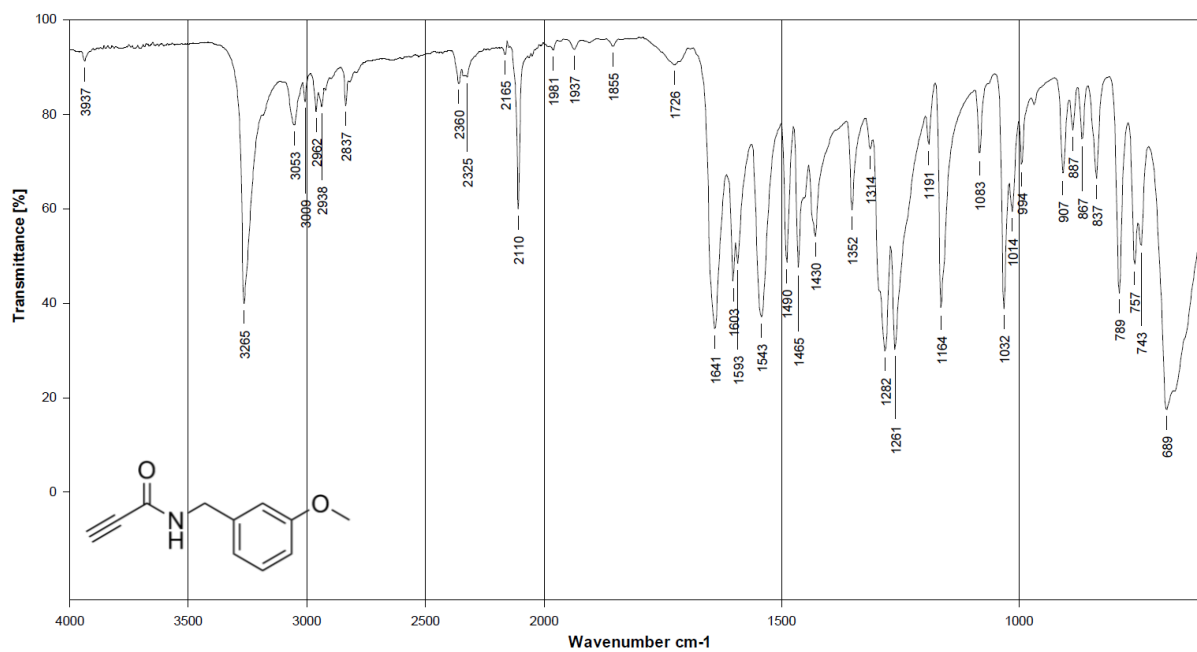



### Methyl 4-[3-(prop-2-ynamidomethyl)phenoxy]butanoate (8f)

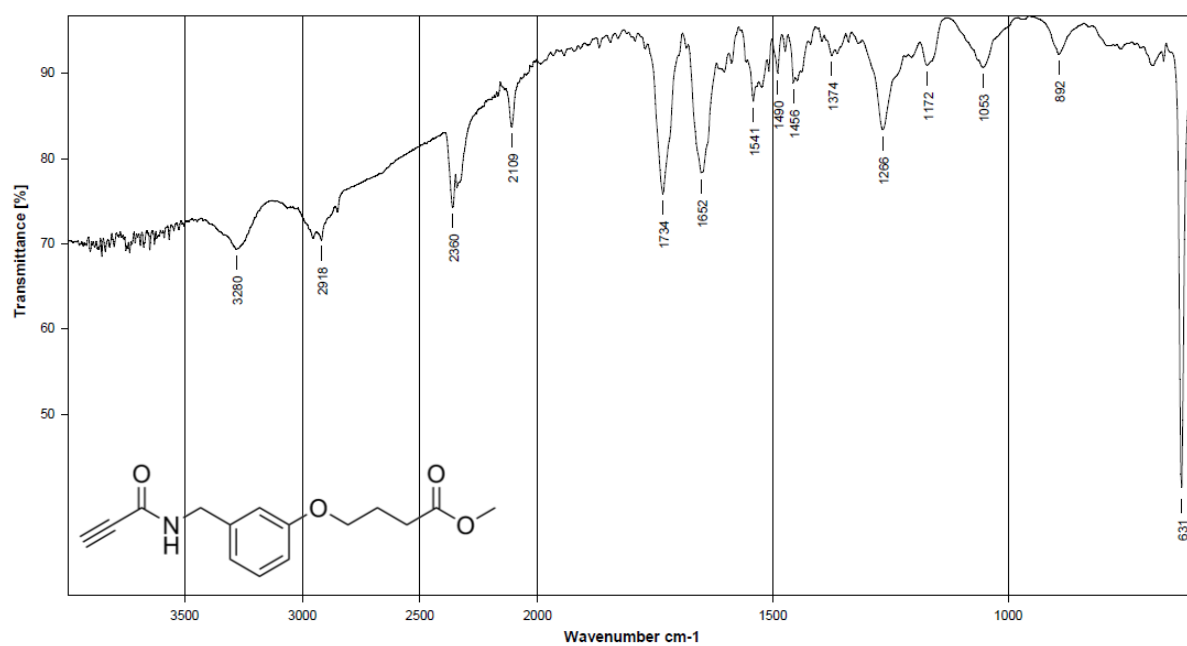

### 4-[3-(Prop-2-ynamidomethyl)phenoxy]butanoic acid (8g)

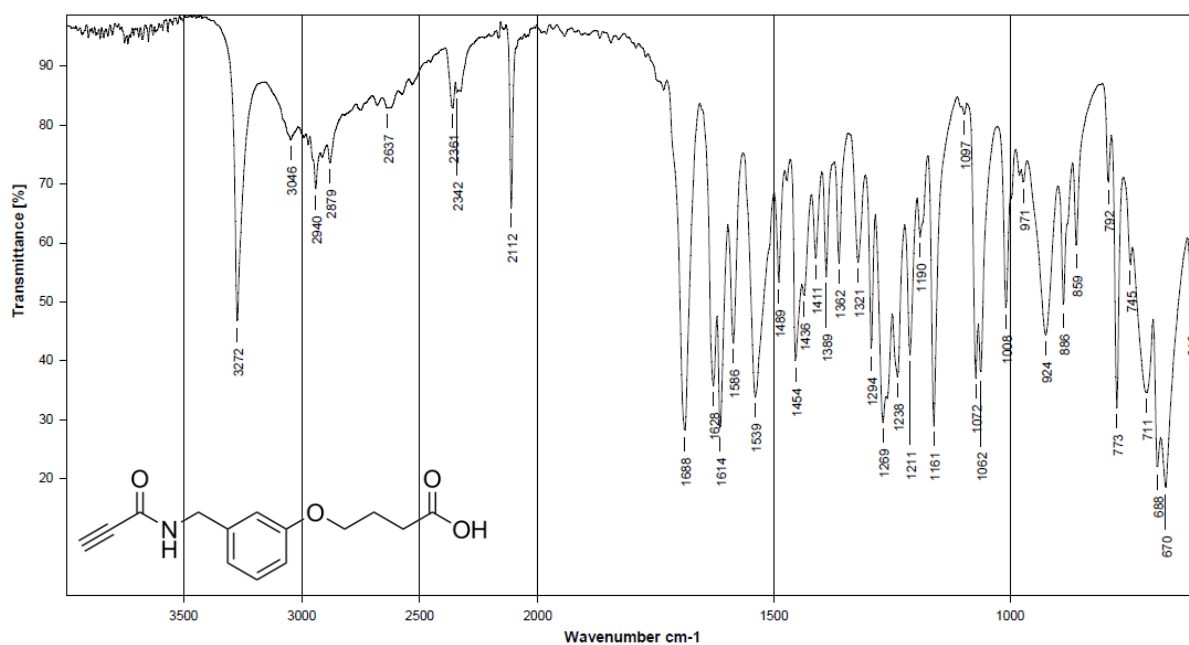

**N-Benzyl-3-(1-benzyl-2,4-dioxo-1,2,3,4-tetrahydropyrimidin-5-yl)prop-2-ynamide (2)**

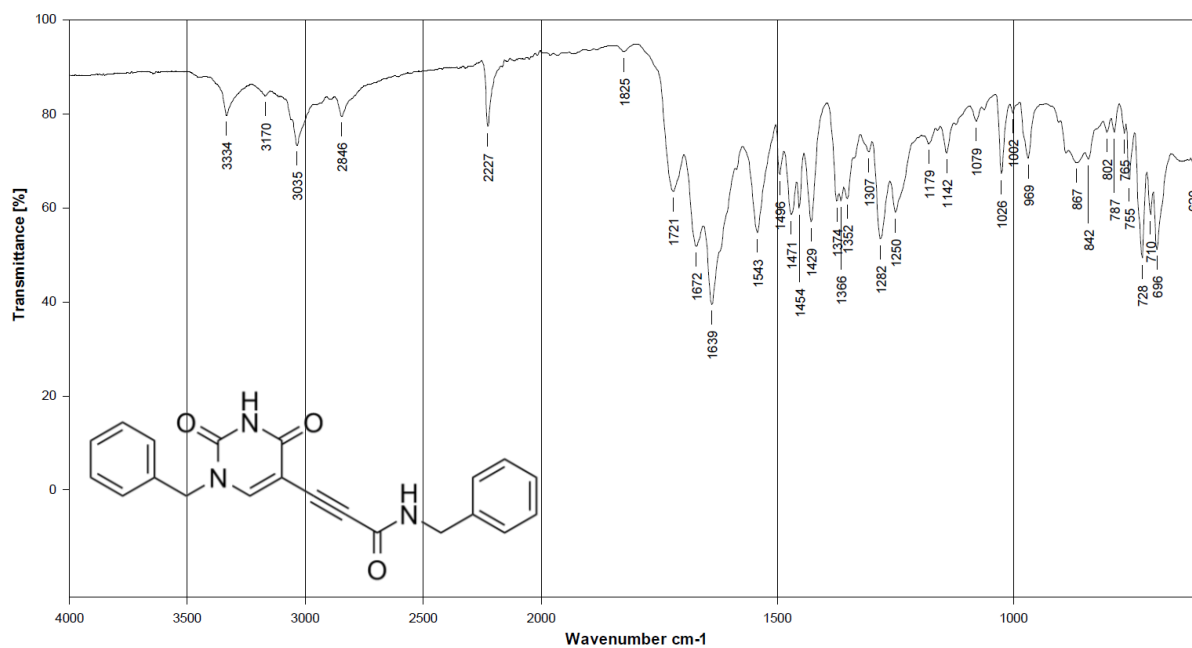

**4-[[5-(2-[(3-methoxyphenyl)methyl]carbamoyl)eth-1-yn-1-yl)-2,4-dioxo-1,2,3,4-tetrahydropyrimidin-1-yl]methyl]benzoic acid (3)**

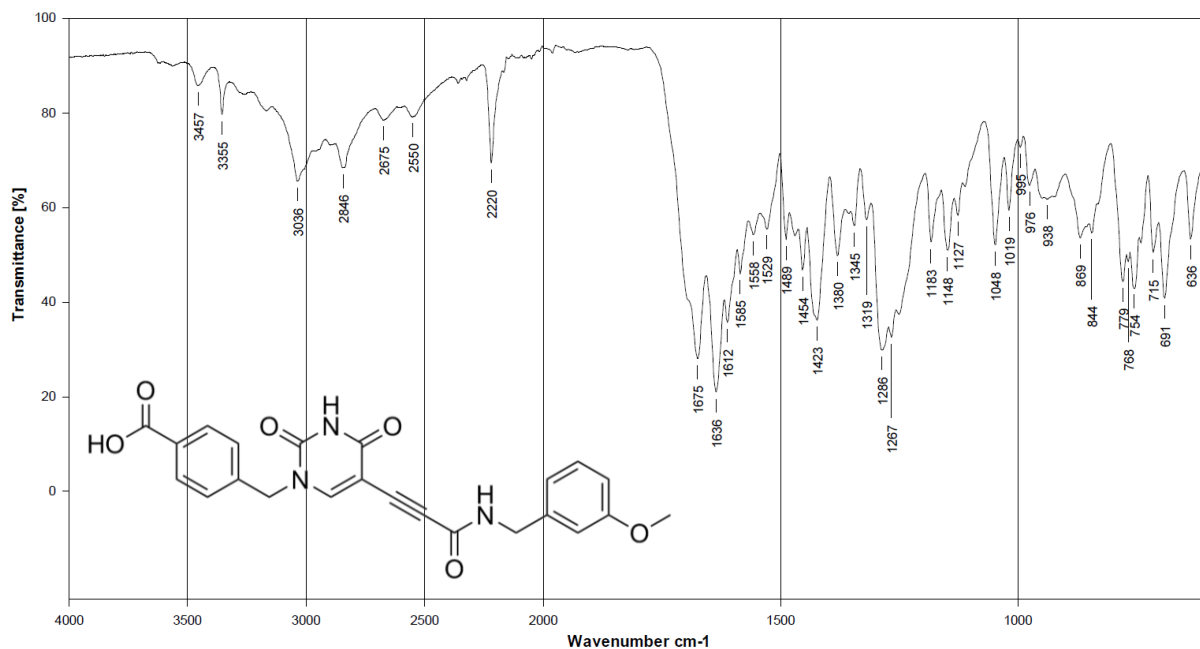

**4-({5-[2-({[3-(3-Carboxypropoxy)phenyl]methyl}carbamoyl)eth-1-yn-1-yl]-2,4-dioxo-1,2,3,4-tetrahydropyrimidin-1-yl}methyl)benzoic acid (4)**

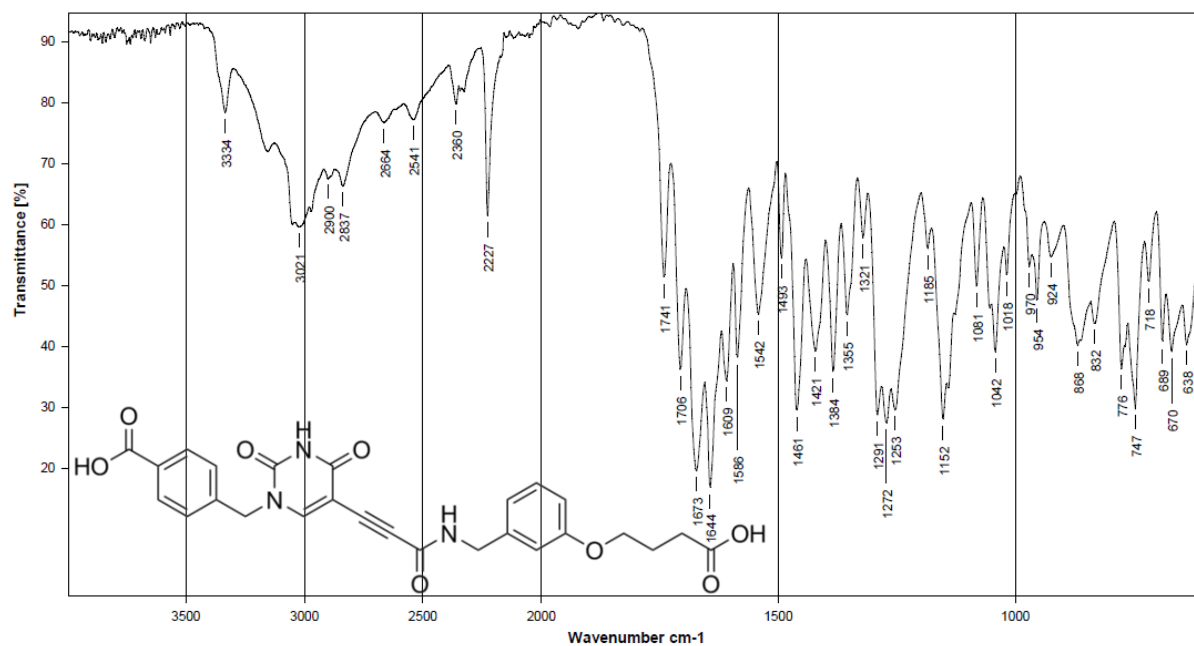

**3-(1-Benzyl-2,4-dioxo-1,2,3,4-tetrahydropyrimidin-5-yl)-N-[(2-fluorophenyl)methyl]prop-2-ynamide (9a)**

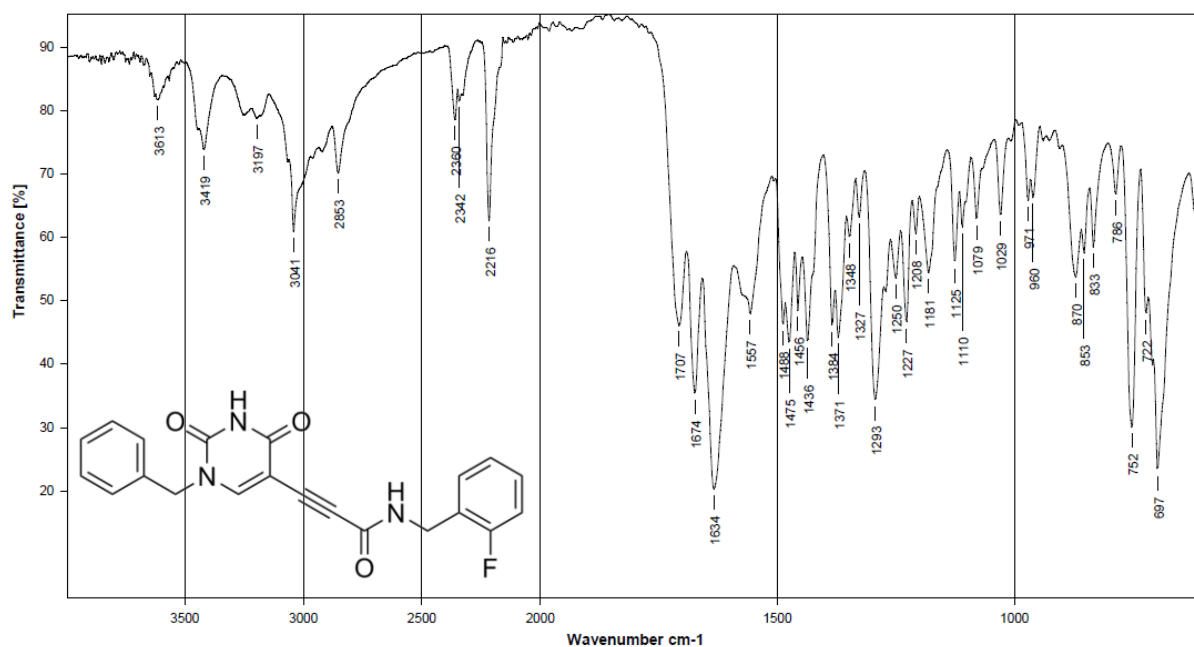

**3-(1-Benzyl-2,4-dioxo-1,2,3,4-tetrahydropyrimidin-5-yl)-N-[(3-fluorophenyl)methyl]prop-2-ynamide (9b)**

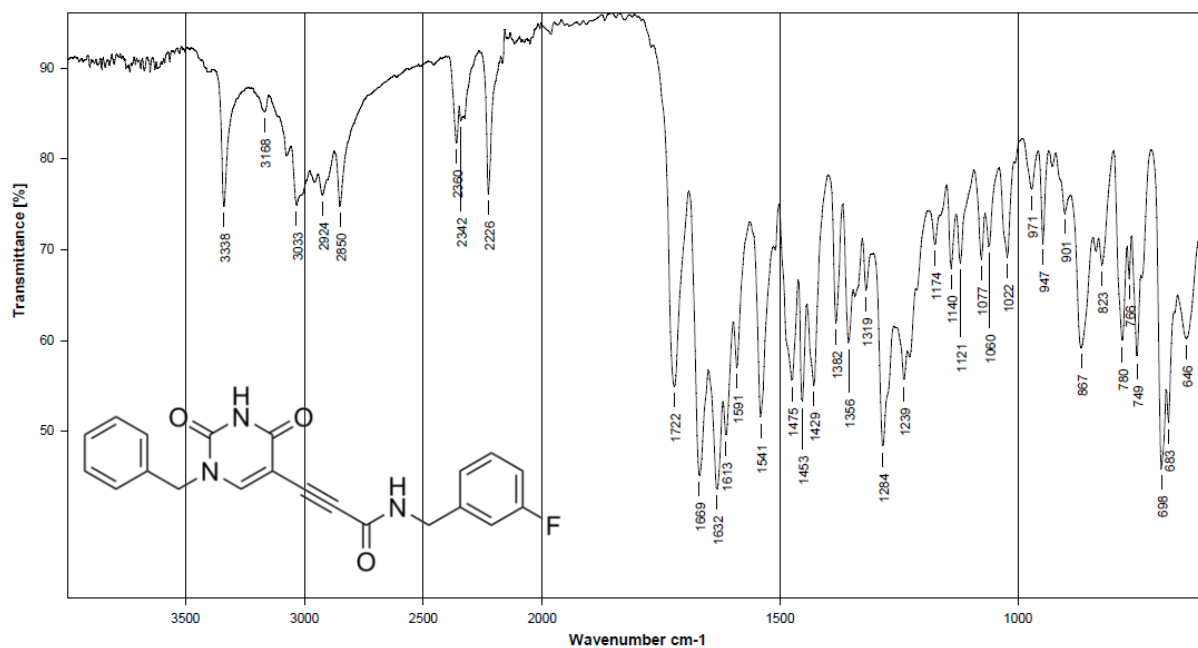

**3-(1-Benzyl-2,4-dioxo-1,2,3,4-tetrahydropyrimidin-5-yl)-N-[(4-fluorophenyl)methyl]prop-2-ynamide (9c)**

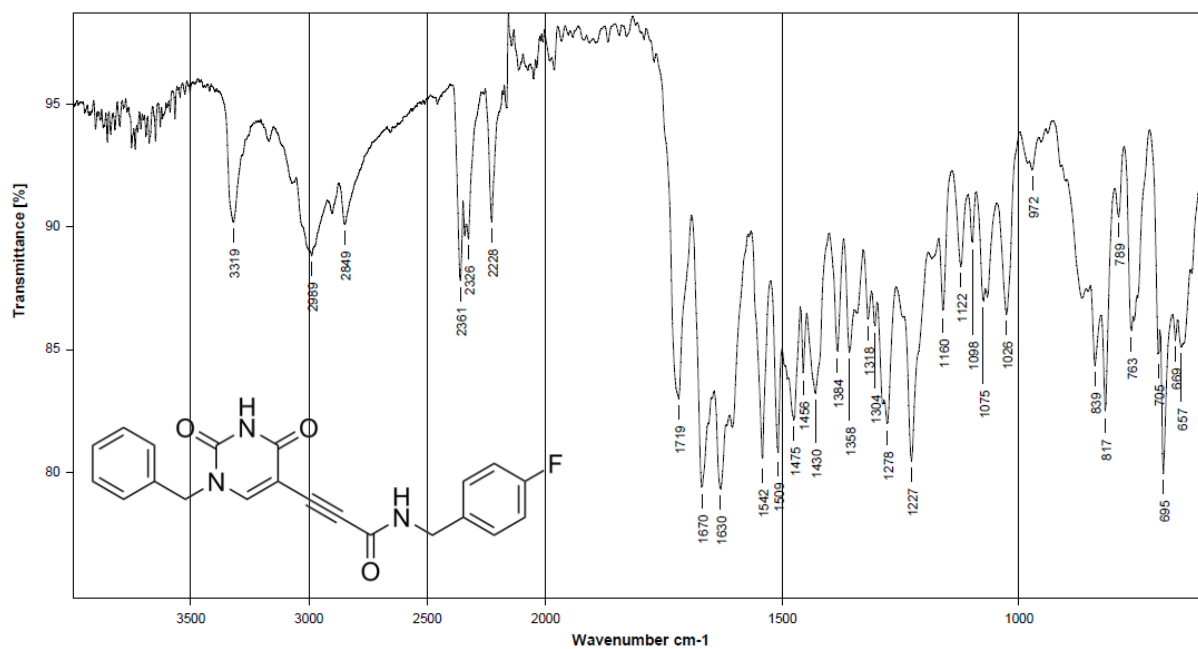

## HPLC – Purity

### N-Benzyl-3-(1-benzyl-2,4-dioxo-1,2,3,4-tetrahydropyrimidin-5-yl)prop-2-ynamide (2)

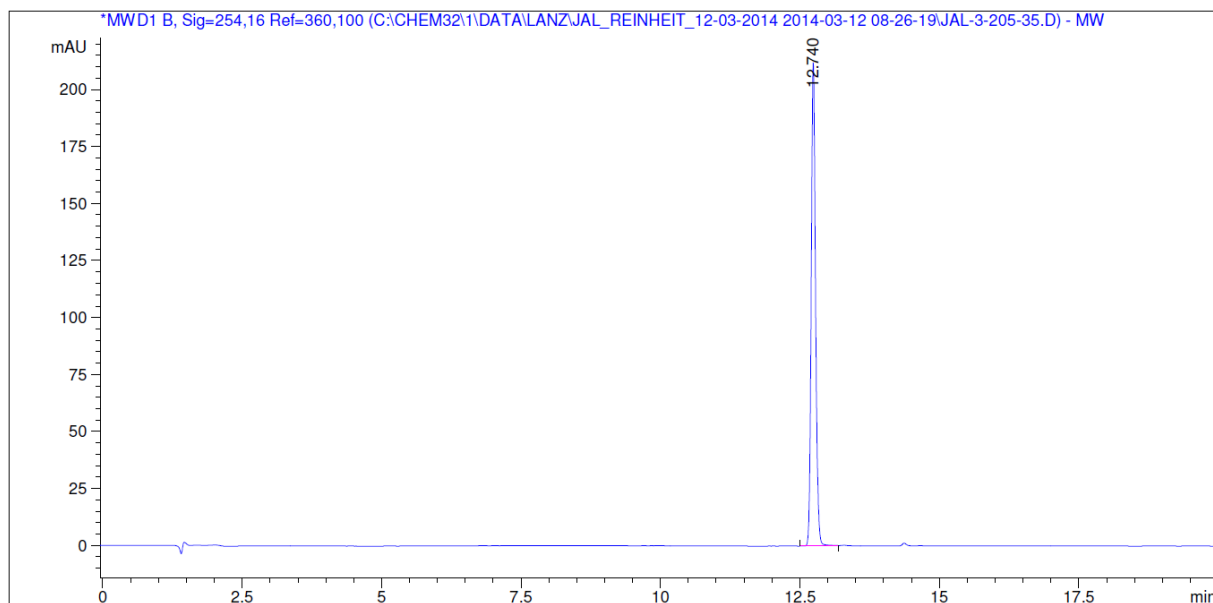

Signal 1: MWD1 B, Sig=254,16 Ref=360,100

Signal has been modified after loading from rawdata file!

| Peak # | RetTime [min] | Type | Width [min] | Area [mAU*s] | Height [mAU] | Area %   |
|--------|---------------|------|-------------|--------------|--------------|----------|
| 1      | 12.740        | BB   | 0.0832      | 1151.00049   | 212.61676    | 100.0000 |

Totals : 1151.00049 212.61676

### 4-[[5-(2-[[3-methoxyphenyl)methyl]carbamoyl]eth-1-yn-1-yl)-2,4-dioxo-1,2,3,4-tetrahydropyrimidin-1-yl]methyl]benzoic acid (3)

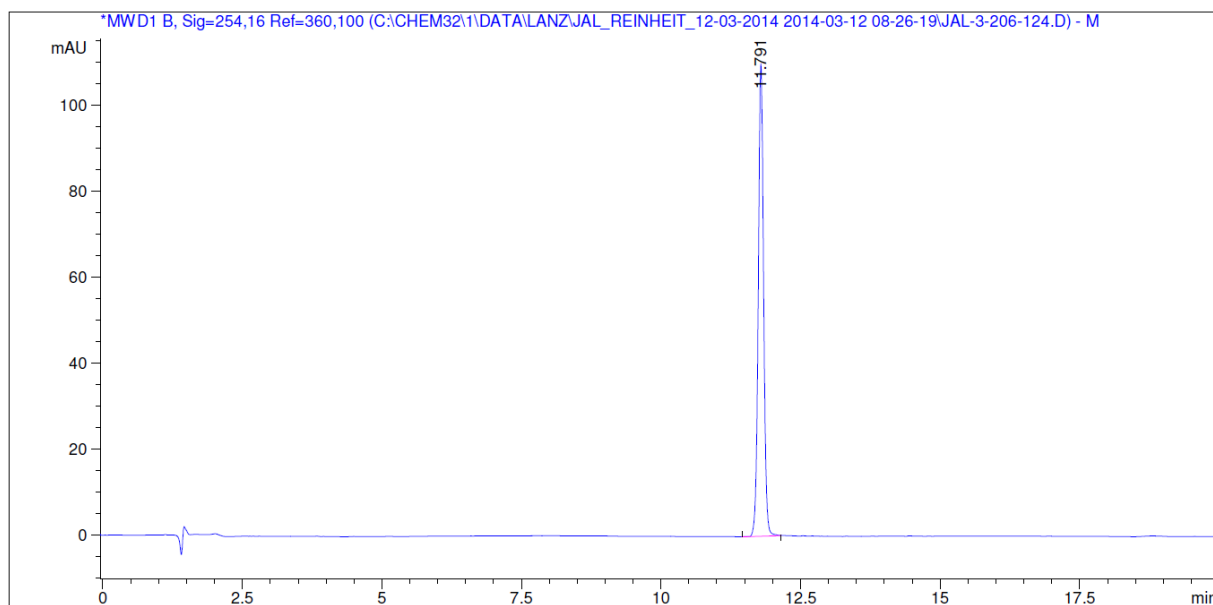

| Peak # | RetTime [min] | Type | Width [min] | Area [mAU*s] | Height [mAU] | Area %   |
|--------|---------------|------|-------------|--------------|--------------|----------|
| 1      | 11.791        | BB   | 0.0985      | 721.39197    | 109.97802    | 100.0000 |

Totals : 721.39197 109.97802

**4-({5-[2-({[3-(3-Carboxypropoxy)phenyl]methyl}carbamoyl)eth-1-yn-1-yl]-2,4-dioxo-1,2,3,4-tetrahydropyrimidin-1-yl}methyl)benzoic acid (4)**

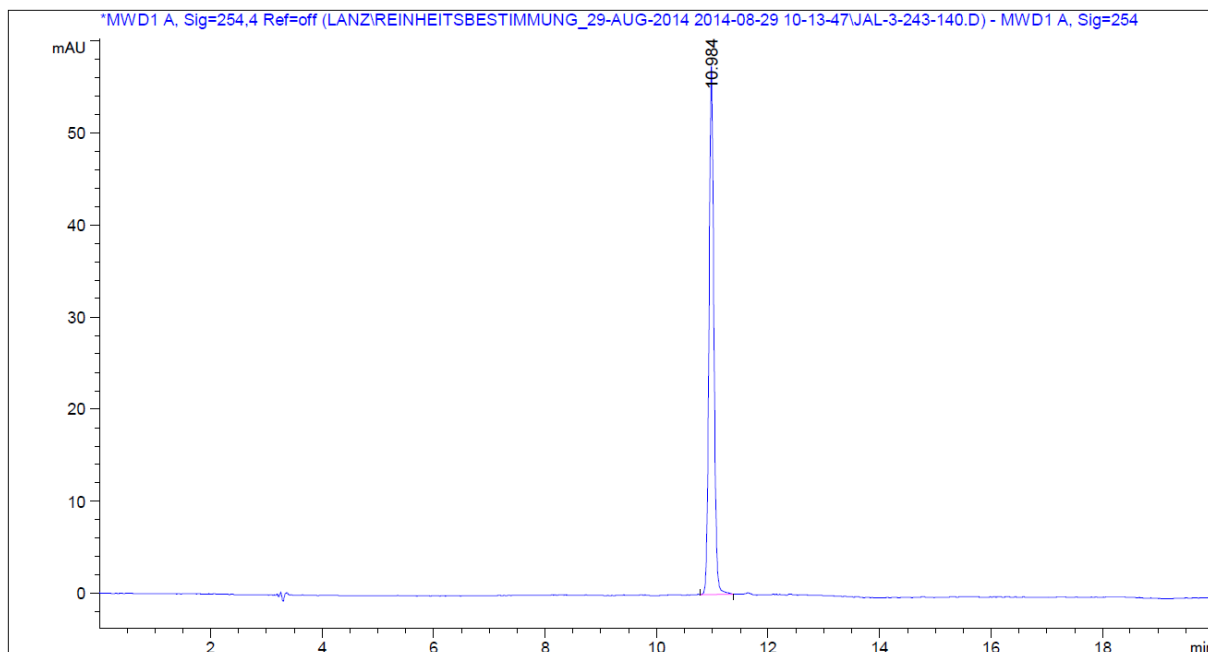

| Peak # | RetTime [min] | Type | Width [min] | Area [mAU*s] | Height [mAU] | Area %   |
|--------|---------------|------|-------------|--------------|--------------|----------|
| 1      | 10.984        | BB   | 0.0924      | 347.10120    | 57.48266     | 100.0000 |

Totals : 347.10120 57.48266

**3-(1-Benzyl-2,4-dioxo-1,2,3,4-tetrahydropyrimidin-5-yl)-N-[(2-fluorophenyl)methyl]prop-2-ynamide (9a)**

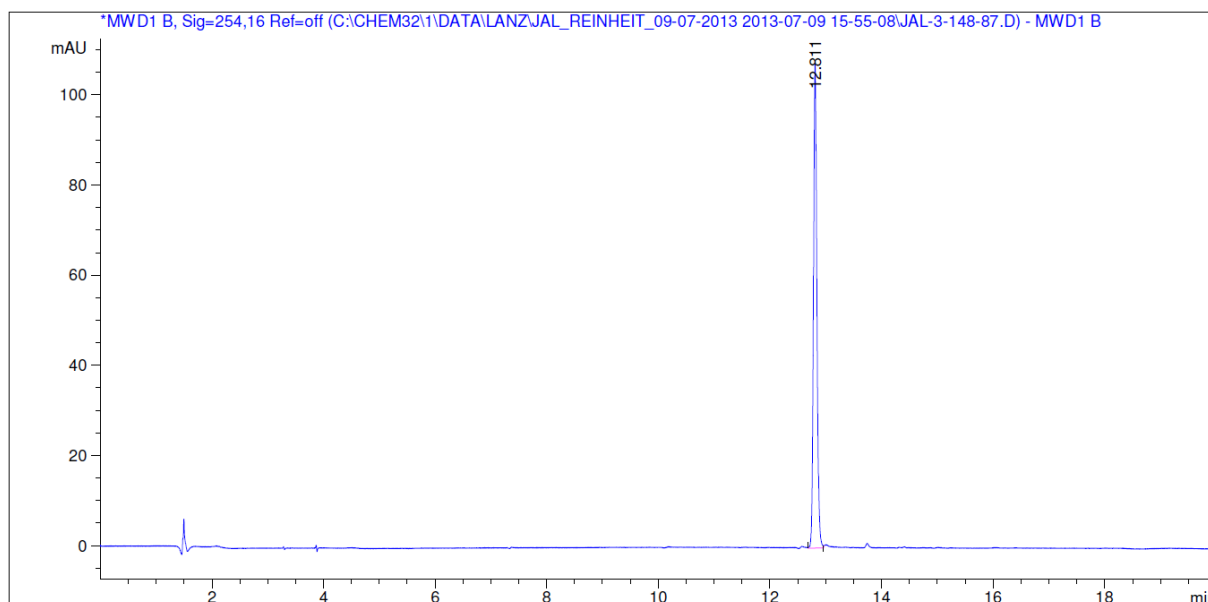

| Peak # | RetTime [min] | Type | Width [min] | Area [mAU*s] | Height [mAU] | Area %   |
|--------|---------------|------|-------------|--------------|--------------|----------|
| 1      | 12.811        | VV   | 0.0647      | 457.53531    | 107.35324    | 100.0000 |

Totals : 457.53531 107.35324

### 3-(1-Benzyl-2,4-dioxo-1,2,3,4-tetrahydropyrimidin-5-yl)-N-[(3-fluorophenyl)methyl]prop-2-ynamide (9b)

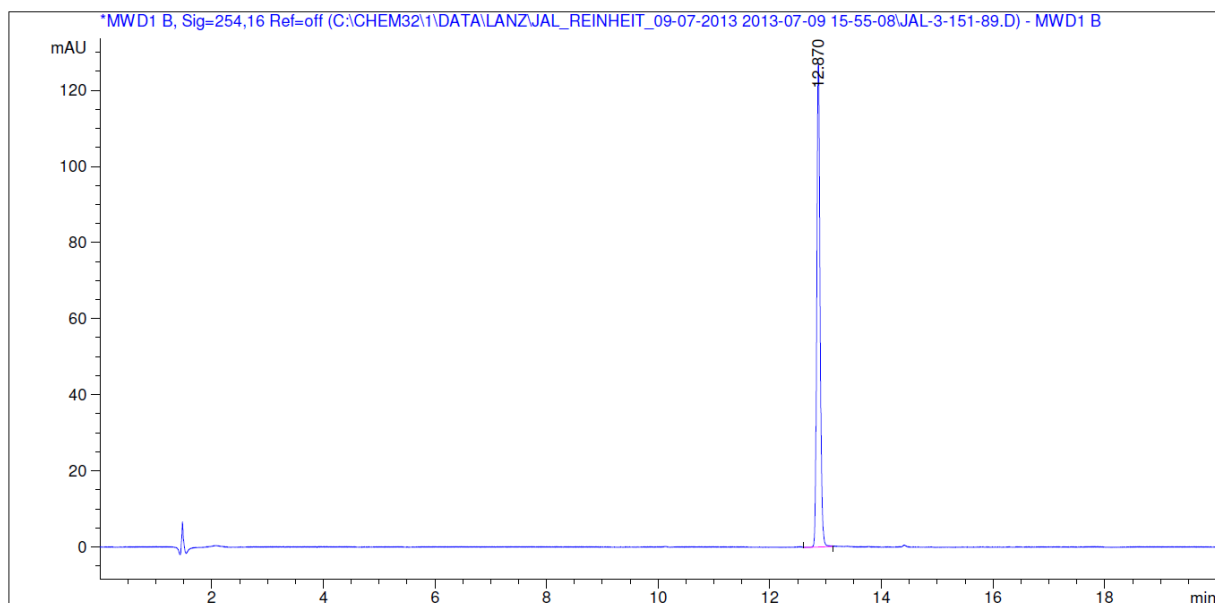

| Peak #   | RetTime [min] | Type | Width [min] | Area [mAU*s] | Height [mAU] | Area %   |
|----------|---------------|------|-------------|--------------|--------------|----------|
| 1        | 12.870        | VB   | 0.0623      | 526.18805    | 126.99585    | 100.0000 |
| Totals : |               |      |             | 526.18805    | 126.99585    |          |

### 3-(1-Benzyl-2,4-dioxo-1,2,3,4-tetrahydropyrimidin-5-yl)-N-[(4-fluorophenyl)methyl]prop-2-ynamide (9c)

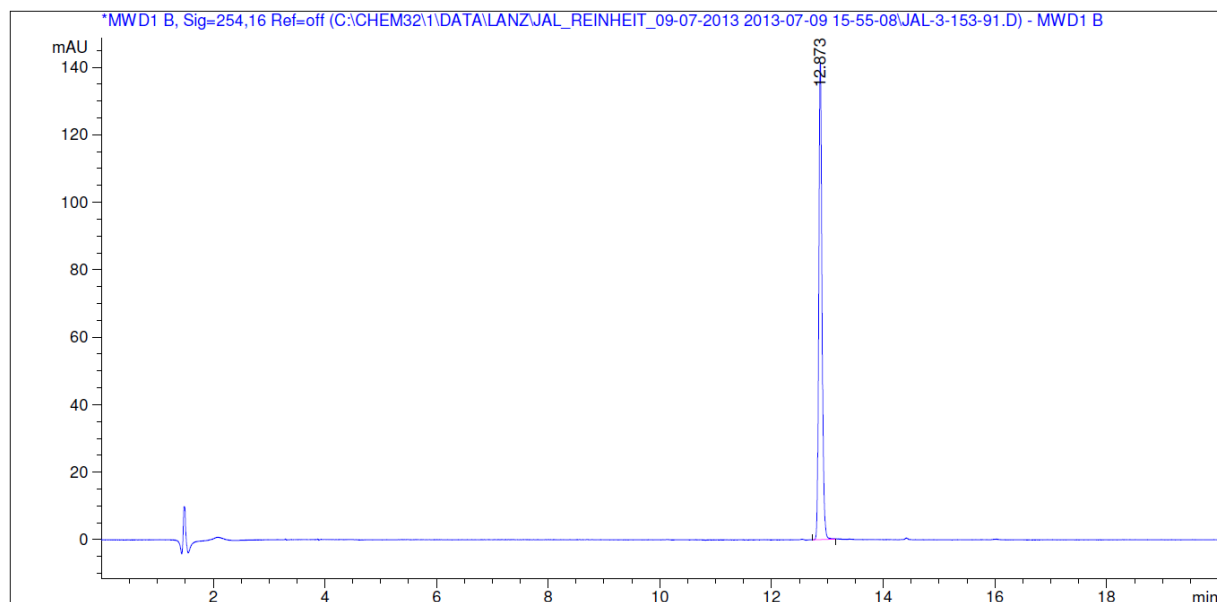

| Peak #   | RetTime [min] | Type | Width [min] | Area [mAU*s] | Height [mAU] | Area %   |
|----------|---------------|------|-------------|--------------|--------------|----------|
| 1        | 12.873        | VB   | 0.0614      | 574.28198    | 141.21097    | 100.0000 |
| Totals : |               |      |             | 574.28198    | 141.21097    |          |

## Elemental analysis

### **N-Benzyl-3-(1-benzyl-2,4-dioxo-1,2,3,4-tetrahydropyrimidin-5-yl)prop-2-ynamide (2)**

Eidgenössische Technische Hochschule Zürich

#### **Laboratorium für Organische Chemie**

Vladimir-Prelog-Weg 3 HCI E304 8093 Zürich Tel: 044/633 43 58

#### **Mikroelementaranalyse**

Name: Lanz Jan Gruppe: OC ZHAW/ICBC  
Labor: RT113 Tel: 058/934 53 59

Substanz: ZHAWOC3212  
Molekularformel: C<sub>21</sub> H<sub>17</sub> N<sub>3</sub> O<sub>3</sub> Mr = 359,38 g/mol

Schmelzpunkt: Zers. >195°C Sublimationspunkt:  
gereinigt: chromat. getrocknet: Vakuum/P205

Bestimmungen: C H N

Eingang: 19.03.14 Ausgang: 19.03.14

#### **M- 157772**

Operator: SM

Berechnete Gewichtsanteile:

[C] 70,18% [H] 4,77% [N] 11,69% [O] 13,36%

Gefundene Gewichtsanteile:

Einwaage: 1,013mg LECO TruSpec Micro  
[C] 70,22% [H] 4,69% [N] 11,66% 19.03.14

### **4-[[5-(2-[[[(3-methoxyphenyl)methyl]carbamoyl]eth-1-yn-1-yl)-2,4-dioxo-1,2,3,4-tetrahydropyrimidin-1-yl]methyl]benzoic acid (3)**

Eidgenössische Technische Hochschule Zürich

#### **Laboratorium für Organische Chemie**

Vladimir-Prelog-Weg 3 HCI E304 8093 Zürich Tel: 044/633 43 58

#### **Mikroelementaranalyse**

Name: Lanz Jan Gruppe: OC ZHAW/ICBC  
Labor: RT113 Tel: 058/934 53 59

Substanz: ZHAWOC3556  
Molekularformel: C<sub>23</sub> H<sub>19</sub> N<sub>3</sub> O<sub>6</sub> Mr = 433,42 g/mol

Schmelzpunkt: 207°C Sublimationspunkt:  
gereinigt: chromat./UK getrocknet: 7d/110°C/Vakuum

Bestimmungen: C H N

Eingang: 09.04.14 Ausgang: 09.04.14

#### **M- 157879**

Operator: PK

Berechnete Gewichtsanteile:

[C] 63,74% [H] 4,42% [N] 9,70% [O] 22,15%

Gefundene Gewichtsanteile:

Einwaage: 1,049mg LECO TruSpec Micro  
[C] 63,73% [H] 4,37% [N] 9,81% 09.04.14



**4-({5-[2-({[3-(3-Carboxypropoxy)phenyl]methyl}carbamoyleth-1-yn-1-yl]-2,4-dioxo-1,2,3,4-tetrahydropyrimidin-1-yl}methyl)benzoic acid (4)**

Eidgenössische Technische Hochschule Zürich

**Laboratorium für Organische Chemie**

Vladimir-Prelog-Weg 3 HCI E304 8093 Zürich

Tel: 044/633 43 58

**Mikroelementaranalyse**

Name: Lanz Jan

Gruppe: OC ZHAW/ICBC

Labor: RT113

Tel: 058/934 53 59

Substanz: ZHAWOC 4457

Molekularformel: C<sub>26</sub> H<sub>23</sub> N<sub>3</sub> O<sub>8</sub>

Mr = 505,48 g/mol

Schmelzpunkt:  
gereinigt: chromat.

Sublimationspunkt:  
getrocknet: 110°C Vac P205

Bestimmungen: C H N

Eingang: 23.07.14

Ausgang: 23.07.14

**M- 158540**

Operator: PK

Berechnete Gewichtsanteile:

[C] 61,78% [H] 4,59% [N] 8,31% [O] 25,32%

Gefundene Gewichtsanteile:

Einwaage: 1,061mg

LECO TruSpec Micro

[C] 61,55% [H] 4,54% [N] 8,24% 23.07.14

**3-(1-Benzyl-2,4-dioxo-1,2,3,4-tetrahydropyrimidin-5-yl)-N-[(2-fluorophenyl)methyl]prop-2-ynamide (9a)**

Eidgenössische Technische Hochschule Zürich

**Laboratorium für Organische Chemie**

Vladimir-Prelog-Weg 3 HCI E304 8093 Zürich

Tel: 044/633 43 58

**Mikroelementaranalyse**

Name: Lanz Jan

Gruppe: OC ZHAW/ICBC

Labor: RT113

Tel: 058/934 53 59

Substanz: ZHAWOC3376

Molekularformel: C<sub>21</sub> H<sub>16</sub> N<sub>3</sub> O<sub>3</sub> F

Mr = 377,37 g/mol

Schmelzpunkt: 190°C zers.  
gereinigt: chromat., UK

Sublimationspunkt:  
getrocknet: HV

Bestimmungen: C H N

Eingang: 29.08.14

Ausgang: 29.08.14

**M- 158714**

Operator: PK

Berechnete Gewichtsanteile:

[C] 66,84% [H] 4,27% [N] 11,13% [O] 12,72% [F] 5,03%

Gefundene Gewichtsanteile:

Einwaage: 0,980mg

LECO TruSpec Micro

[C] 66,67% [H] 4,05% [N] 11,02% 29.08.14

### 3-(1-Benzyl-2,4-dioxo-1,2,3,4-tetrahydropyrimidin-5-yl)-N-[(4-fluorophenyl)methyl]prop-2-ynamide (9c)

Eidgenössische Technische Hochschule Zürich

#### Laboratorium für Organische Chemie

Vladimir-Prelog-Weg 3 HCI E304 8093 Zürich

Tel: 044/633 43 58

#### Mikroelementaranalyse

Name: Lanz Jan  
Labor: RT113

Gruppe: OC ZHAW/ICBC  
Tel: 058/934 53 50

Substanz: ZHAWOC3372

Molekularformel: C<sub>21</sub> H<sub>16</sub> N<sub>3</sub> O<sub>3</sub> F

Mr = 377,37 g/mol

Schmelzpunkt: 195°C zers.  
gereinigt: chromat., UK

Sublimationspunkt:  
getrocknet: 130°C Vac

Bestimmungen: C H N

Eingang: 10.09.14

Ausgang: 10.09.14

#### M- 158751

Operator: PK

Berechnete Gewichtsanteile:

[C] 66,84% [H] 4,27% [N] 11,13% [O] 12,72% [F] 5,03%

Gefundene Gewichtsanteile:

Einwaage: 1,010mg

LECO TruSpec Micro

[C] 66,59% [H] 4,05%

[N] 11,17%

10.09.14

## References

- [1] *Molecular Operating Environment (MOE)*, Chemical Computing Group Inc., 1010 Sherbooke St. West, Suite #910, Montreal, QC, Canada, H3A 2R7, **2013**.
- [2] A. R. Johnson, A. G. Pavlovsky, D. F. Ortwine, F. Prior, C.-F. Man, D. A. Bornemeier, C. A. Banotai, W. T. Mueller, P. McConnell, C. Yan, V. Baragi, C. Lesch, W. H. Roark, M. Wilson, K. Datta, R. Guzman, H.-K. Han, R. D. Dyer, *J. Biol. Chem.* **2007**, *282*, 27781–27791.
- [3] H. M. Berman, J. Westbrook, Z. Feng, G. Gilliland, T. N. Bhat, H. Weissig, I. N. Shindaylov, P. E. Bourne, *Nucl. Acids Res.* **2000**, *28*, 235–242.
- [4] E. F. Pettersen, T. D. Goddard, C. C. Huang, G. S. Couch, D. M. Greenblatt, E. C. Meng, T. E. Ferrin, *J. Comput. Chem.* **2004**, *25*, 1605–1612.
- [5] N. G. Kundu, S. K. Dasgupta, *J. Chem. Soc., Perkin Trans 1* **1993**, 2657–2663.
- [6] G. M. Coppola, R. E. Damon, *Synth. Commun.* **1993**, *23*, 2003–2010.
